# Supplementary material for: A tetrazole-ene photoactivatable fluorophore with improved brightness and stability in protic solution
Source: Royal Society of Chemistry journal article supplement (doi:10.1039/d2cc03482d), 2022-01-01

Supplementary Information for

**Tetrazole-ene Photoactivatable Fluorophore with Improved Brightness and Stability in Protic Solution**

*Yi-Kang Zhang, Meng Li, Lan Ruan and Peng An\**

School of Chemical Science and Technology & Key Laboratory of Medicinal Chemistry for Natural Resource, Ministry of Education, Yunnan University, Kunming 650091, P. R. China.

**Table of Contents**

**Supplementary Figures and Tables**

|                                                                                                                                                       |     |
|-------------------------------------------------------------------------------------------------------------------------------------------------------|-----|
| Figures S1 UV-Vis spectra of pyrazolines in acetonitrile .....                                                                                        | S2  |
| Table S1. Details of signal crystal structure of <b>Tet-9</b> . .....                                                                                 | S3  |
| Table S2. Photophysical properties of <b>2-Pyr</b> and <b>3-Pyr</b> . .....                                                                           | S4  |
| Figure S2. Schematic illustration fluorescence quench process of <b>3-Pyr</b> by excited-state intramolecular proton transfer (ESIPT) .....           | S4  |
| Figure S3. Photostability of turn-on fluorophores under UV light .....                                                                                | S5  |
| Figure S4. Stability of turn-on fluorophores in the room temperature .....                                                                            | S7  |
| Figure S5. Time course spectra of the ligand attached photoactivatable fluorophore .....                                                              | S8  |
| Figure S6. Water solubility test of <b>Tet-12</b> and <b>Pyr-12</b> .....                                                                             | S9  |
| Figure S7. Fluorescence intensity comparison of <b>Pyr-1</b> and <b>Pyr-12</b> in different solvents .....                                            | S10 |
| Figure S8. Fluorescence intensity of <b>Pyr-1</b> and <b>Pyr-12</b> in different viscosity.....                                                       | S10 |
| Figure S9. Cell toxicity study of compounds <b>Tet-12</b> and <b>Pyr-12</b> .....                                                                     | S11 |
| Figure S10. Confocal micrographs comparison of mitochondria-targeting probes <b>TPP-Tet-1</b> and <b>TPP-Tet-12</b> at 500 nM concentration .....     | S11 |
| Figure S11. Confocal micrographs comparison of mitochondria-targeting probes <b>TPP-Tet-1</b> and <b>TPP-Tet-12</b> at 100 nM concentration.....      | S11 |
| Figure S12. Confocal micrographs comparison of mitochondria-targeting probes <b>TPP-Tet-1</b> and <b>TPP-Tet-12</b> at 10 $\mu$ M concentration ..... | S12 |
| Figure S13. Confocal micrographs comparison of ER-targeting probes <b>Cl-Tet-1</b> and <b>Cl-Tet-12</b> at 500 nM concentration. ....                 | S12 |
| Figure S14. Time-coursed confocal micrographs of ER-targeting probe <b>Cl-Tet-12</b> . ....                                                           | S13 |
| Figure S15. Confocal micrographs comparison of Lysosome-targeting probes <b>Mor-Tet-1</b> and <b>Mor-Tet-12</b> at 500 nM concentration.....          | S13 |
| Figure S16. Time-coursed confocal micrographs of Lysosome-targeting probe <b>Mor-Tet-12</b> .....                                                     | S14 |
| Figure S17. Confocal micrographs comparison of Lysosome-targeting probes <b>Mor-Tet-1</b> and <b>Mor-Tet-12</b> at 500 nM concentration.....          | S14 |
| Figure S18. Confocal micrographs based in vivo stability study.....                                                                                   | S15 |
| Figure S19. Zoomed confocal micrographs of Lysosome-targeting probes in different concentrations .....                                                | S15 |
| <b>Supplemental Methods</b> .....                                                                                                                     | S16 |
| <b>General Information</b> .....                                                                                                                      | S17 |
| <b>Experimental Synthesis Procedures and Characterization Data</b> .....                                                                              | S17 |
| <b>References</b> .....                                                                                                                               | S26 |
| <b><sup>1</sup>H and <sup>13</sup>C NMR Spectra</b> .....                                                                                             | S27 |

(a)

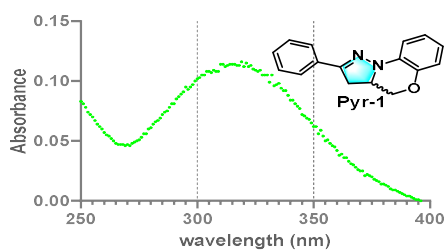

(b)

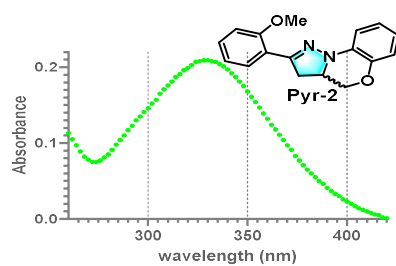

(c)

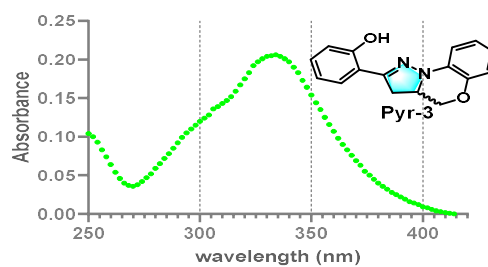

(d)

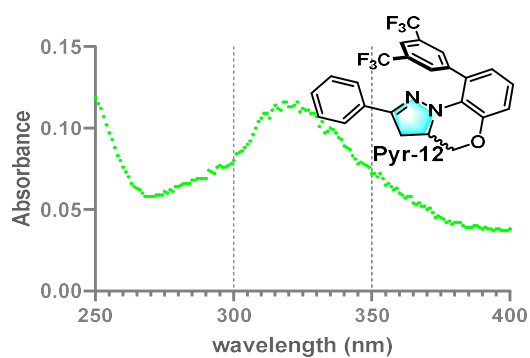

**Figure S1** UV-Vis spectra of pyrazolines (a) **pyr-1**, (b) **pyr-2** (c) **pyr-3** and (d) **pyr-12** in acetonitrile with 10  $\mu$ M concentration.

**Table S1.** Details of the Crystal Structure of **Tet-9**.

|                                                  |                                                   |
|--------------------------------------------------|---------------------------------------------------|
| CCDC No.                                         | 2165940                                           |
| empirical formula                                | C <sub>22</sub> H <sub>17</sub> FN <sub>4</sub> O |
| formula wt                                       | 372.39                                            |
| crystal system                                   | Monoclinic                                        |
| space group                                      | P2(1)/c                                           |
| T (K)                                            | 298(2)                                            |
| <i>a</i> (Å)                                     | 5.5665(3)                                         |
| <i>b</i> (Å)                                     | 23.9215(16)                                       |
| <i>c</i> (Å)                                     | 13.9094(9)                                        |
| $\alpha$ (°)                                     | 90                                                |
| $\beta$ (°)                                      | 91.355(3)                                         |
| $\gamma$ (°)                                     | 90                                                |
| <i>V</i> (Å <sup>3</sup> )                       | 1851.6(2)                                         |
| <i>Z</i>                                         | 4                                                 |
| $\rho_{\text{calcd}}$ (mg/m <sup>3</sup> )       | 1.336                                             |
| $\mu$ (mm <sup>-1</sup> )                        | 0.092                                             |
| $\theta$ range (°)                               | 2.246–25.142                                      |
| <i>F</i> (000)                                   | 776                                               |
| collected reflcns                                | 17537                                             |
| unique reflcns no.                               | 3314                                              |
| <i>R</i> [ <i>I</i> > 2 $\sigma$ ( <i>I</i> )]   | 0.0777                                            |
| <i>R</i> (ref)                                   | 0.1634                                            |
| <i>wR2</i> [ <i>I</i> > 2 $\sigma$ ( <i>I</i> )] | 0.1981                                            |
| <i>wR2</i> (ref)                                 | 0.2642                                            |

**Table S2** Photophysical properties of **2-pyr** and **3-pyr** in solution<sup>a</sup>.

| samples      | $\lambda_{\text{max}}$ (nm) | $\epsilon_{\text{max}}$ ( $\text{M}^{-1}\text{cm}^{-1}$ ) | $\lambda_{\text{em}}$ (nm) <sup>b</sup> | Stokes shift ( $\text{cm}^{-1}$ ) | $\Phi_f$ (%) <sup>c</sup> | Quenching efficiency (%) <sup>d</sup> |
|--------------|-----------------------------|-----------------------------------------------------------|-----------------------------------------|-----------------------------------|---------------------------|---------------------------------------|
| <b>3-pyr</b> | 328                         | 20,900                                                    | 484                                     | 9980                              | 0.23                      | -                                     |
| <b>2-pyr</b> | 334                         | 20,600                                                    | 484                                     | 9290                              | 0.01                      | 0.95                                  |

<sup>a</sup> Measured in Acetonitrile ( $10 \mu\text{M}$ ). <sup>b</sup>  $\lambda_{\text{ex}} = 350 \text{ nm}$ . <sup>c</sup> Quinine sulfate ( $\Phi_f = 0.54$  in  $0.1 \text{ M H}_2\text{SO}_4$ ) as a reference. <sup>d</sup> Quenching efficiency =  $1 - \frac{\text{Maximum Intensity of Hydroxy-pyrazolone}}{\text{Maximum Intensity of Methoxy-pyrazolone}}$

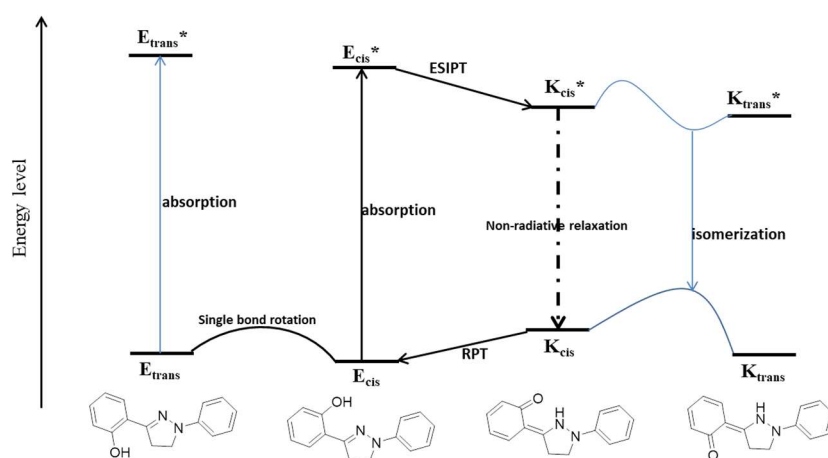

**Figure S2.** Schematic illustration fluorescence quench mechanism of pyrazoline by excited-state intramolecular proton transfer (ESIPT).

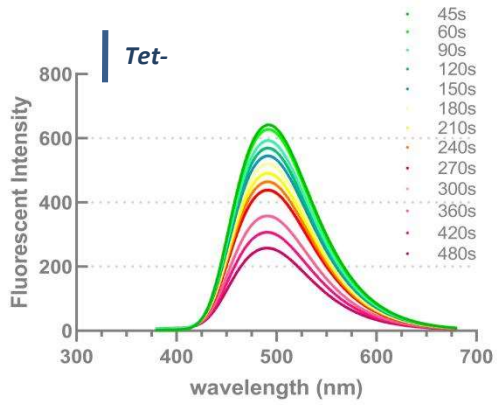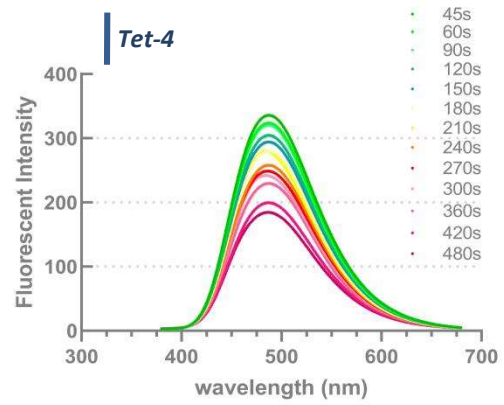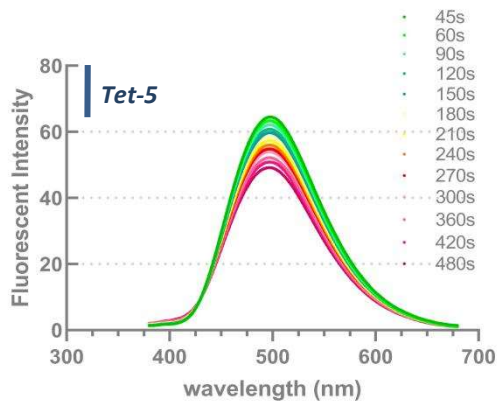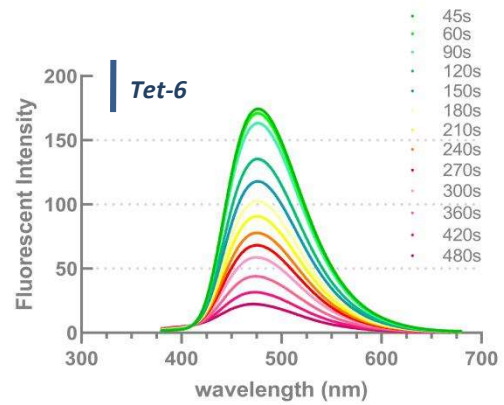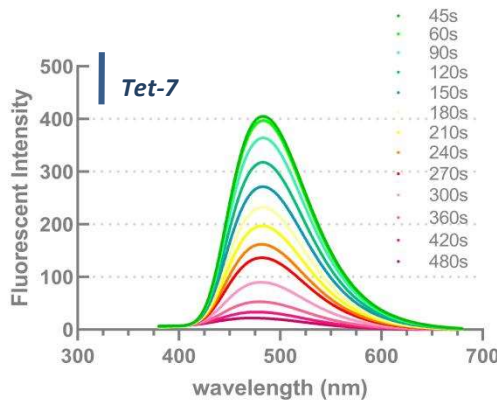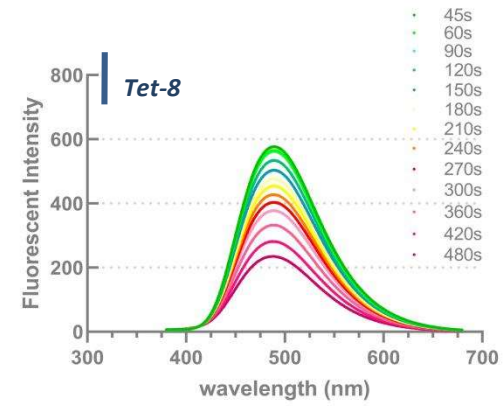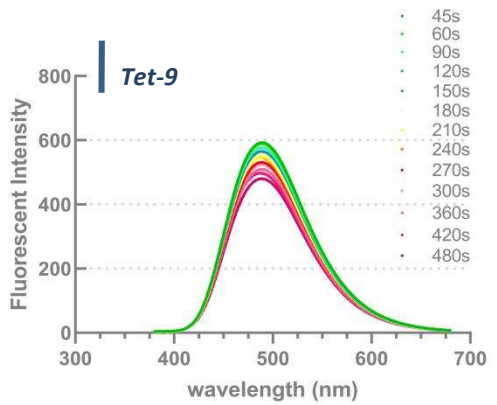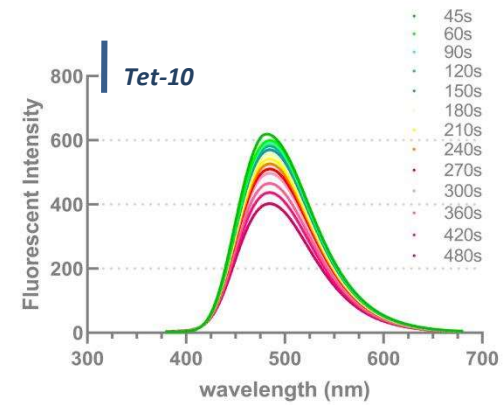

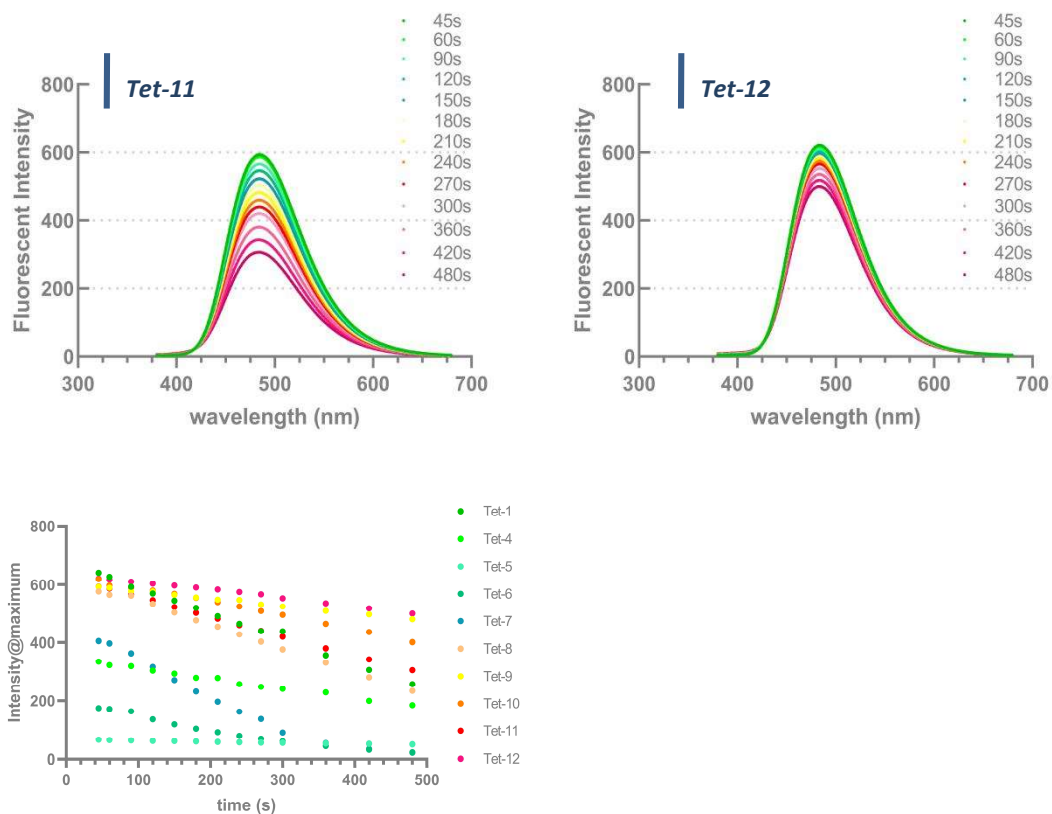

**Figure S3** Photostability of pyrazole fluorophores generated from ten tetrazoles: **Tet-1**, **Tet-4–Tet-12**. The samples were made 10  $\mu\text{M}$  solution in ACN and keep irradiation using 310 nm UV light and monitored by fluorimeter (the pyrazoline fluorophores were generally formed after 45 s irradiation).

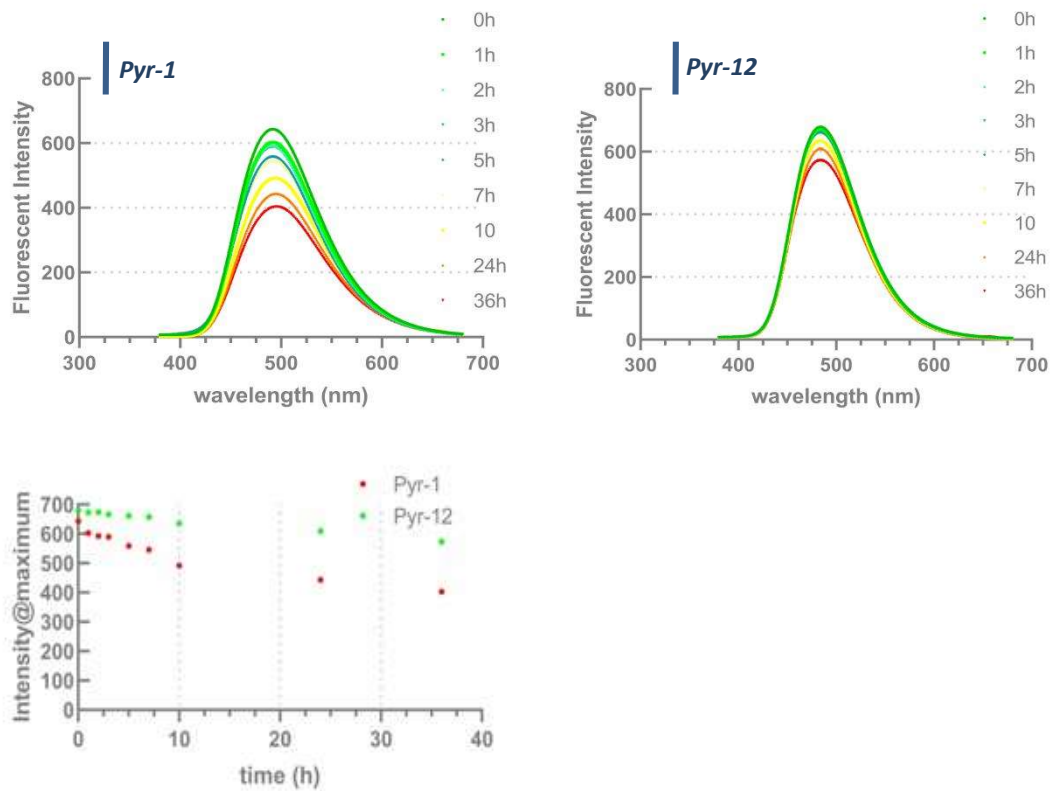

**Figure S4** Stability of fluorophores **Pyr-1** and **Pyr-12** at ambient temperature. The samples were made 10  $\mu$ M solution in ACN at room temperature and monitored by fluorimeter.

(a)

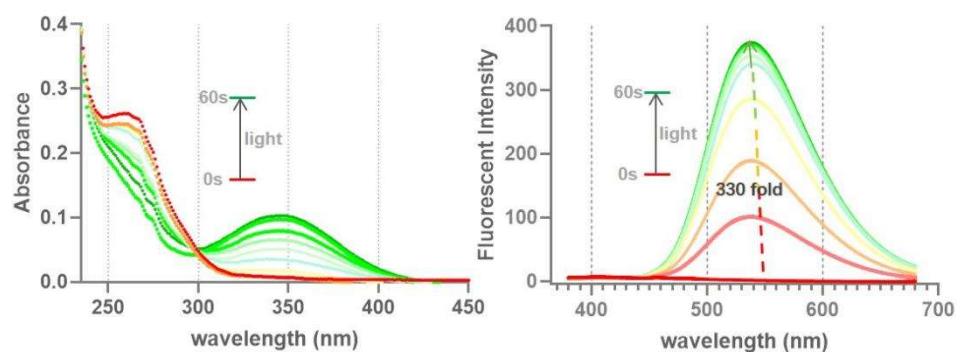

(b)

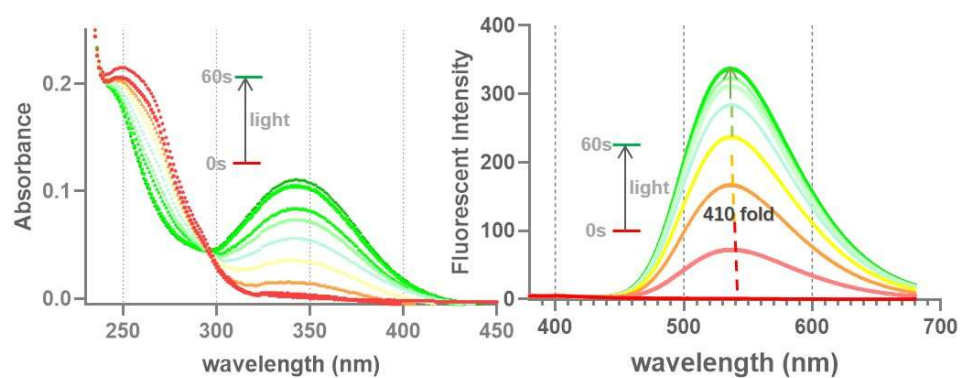

(c)

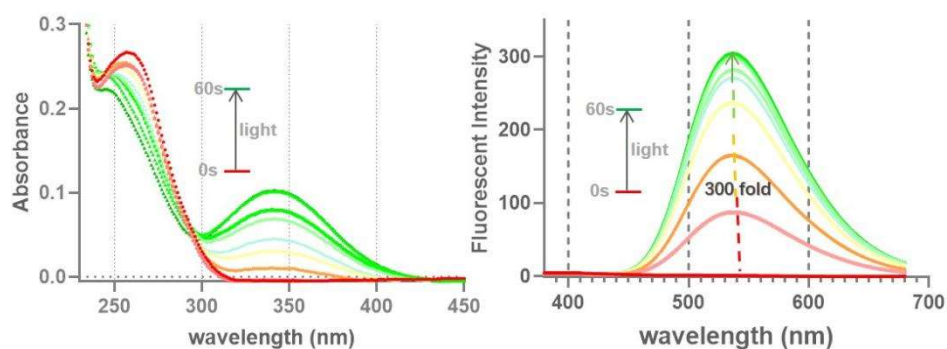

**Figure S5** Time course of the photoactivatable fluorophore **TPP-Tet-12** (a), **Cl-Tet-12** (b), and **Mor-Tet-12** (c) as monitored by UV-vis absorption and fluorescence emission during light irradiation using a 310 nm light with 10  $\mu$ M in PBS/ACN (1:1)



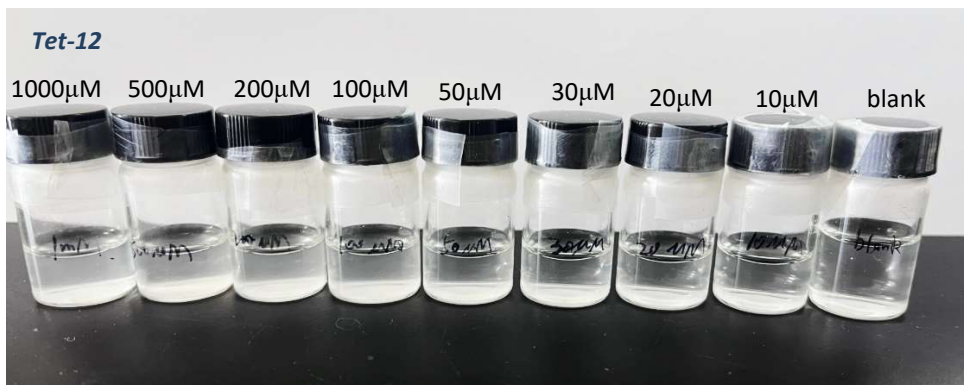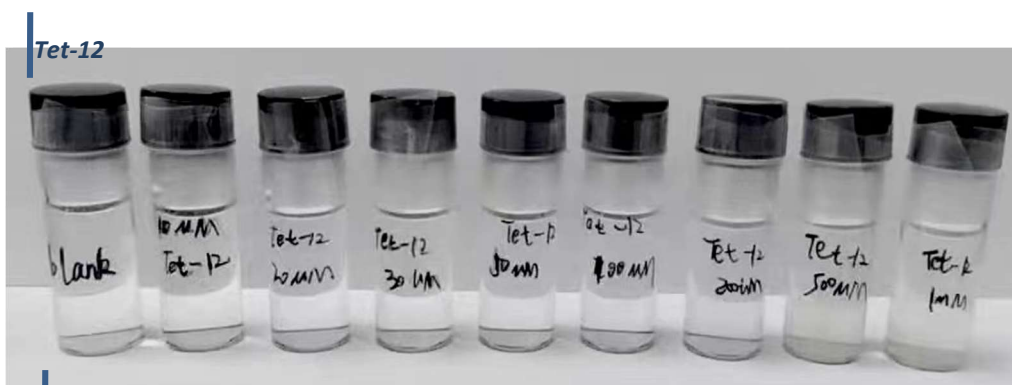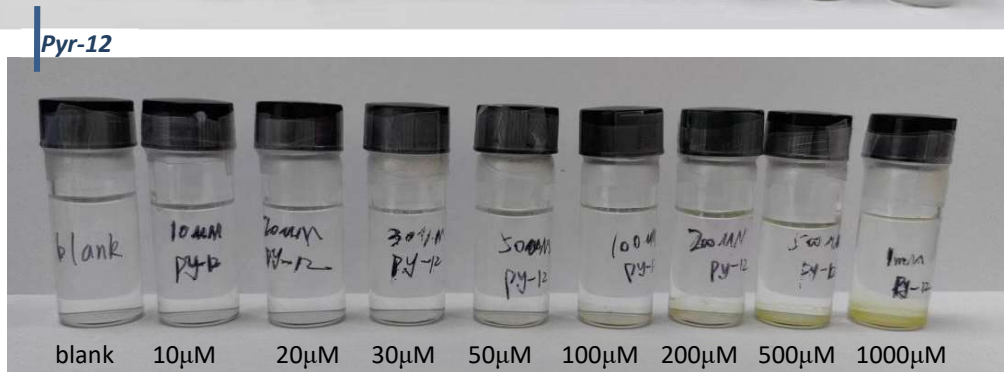

**Figure S6** Solubility test of **Tet-12** and **Pyr-12** in pure PBS buffer at different concentration at room temperature.

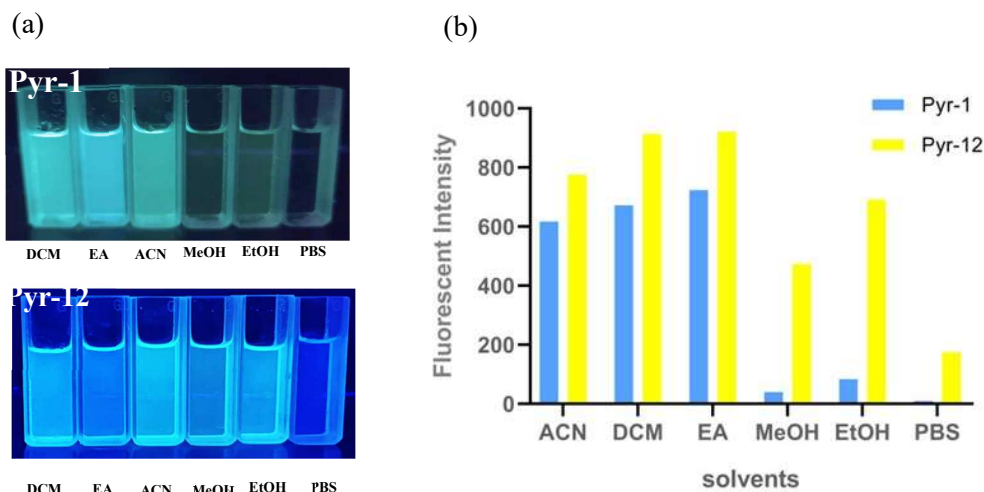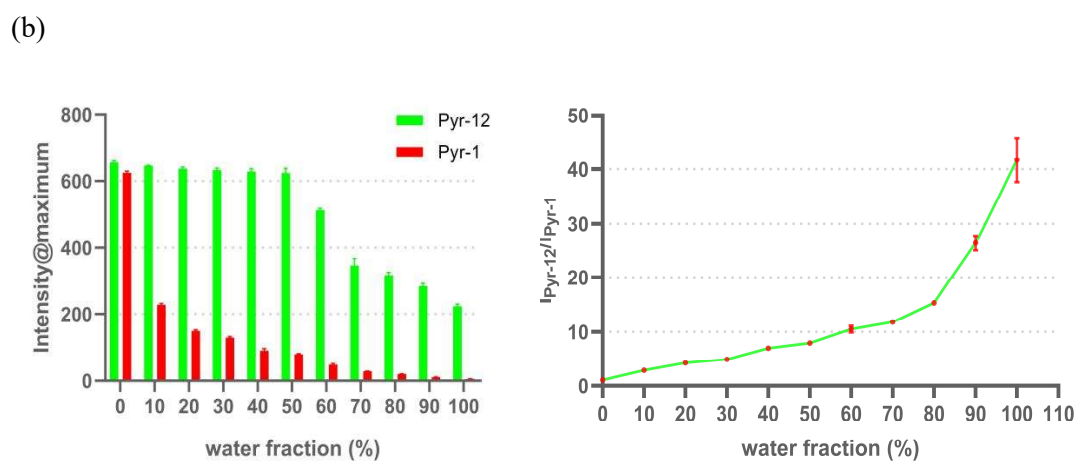

**Figure S7** Fluorescence of **Pyr-1** and **Pyr-12** in different solvents at 10  $\mu$ M concentration. (a) Fluorescence intensity comparison at maximum wavelength of **Pyr-1** and **Pyr-12** in six different solvents. (b) Fluorescence intensity comparison at maximum wavelength of **Pyr-1** and **Pyr-12** in PBS-ACN mixed solvents (the fraction of PBS from 0 to 100%) and the corresponding fluorescent intensity ratio of **Pyr-1** and **Pyr-12** at maximum wavelength.

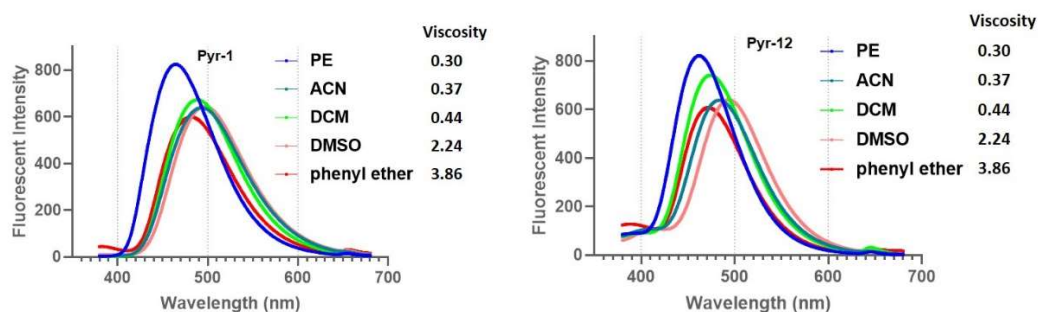

**Figure S8** Fluorescence of **Pyr-1** and **Pyr-12** in five solvents with different viscosity. The samples were made 10  $\mu$ M at room temperature and monitored by fluorimeter.

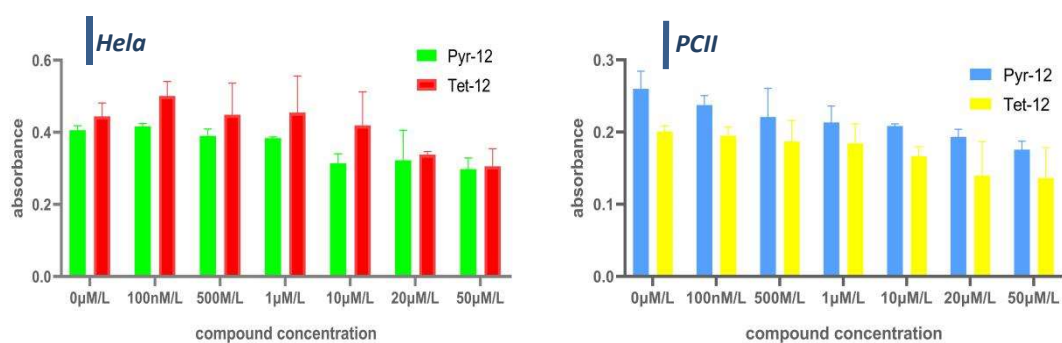

**Figure S9** Cell viability of HeLa and PCII cells treated with **Pyr-12** and **Tet-12**.

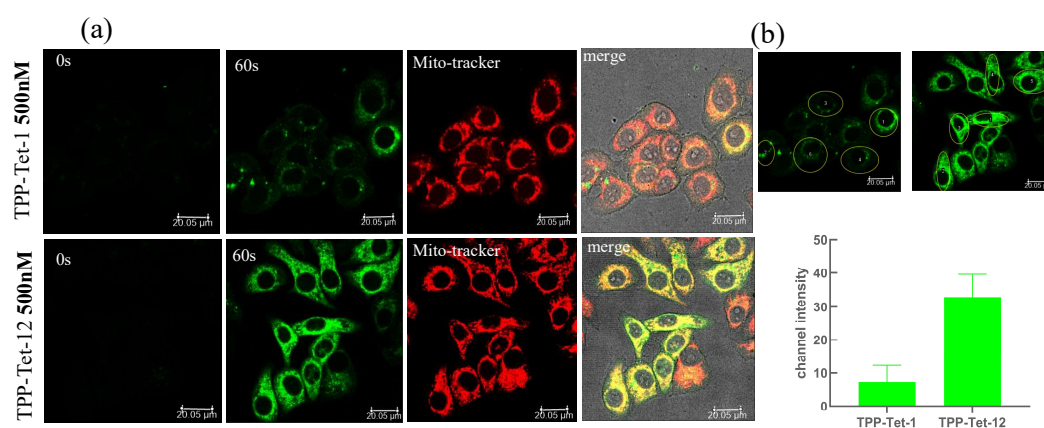

**Figure S10** (a) Confocal micrographs of mitochondria-targeting probes **TPP-Tet-1** and **TPP-Tet-12** treated HeLa cells before and after 60s photoillumination with 310 nm light lamp. 500 nM photoactivatable fluorophores **TPP-Tet-1** and **TPP-Tet-12** were treated in cell culture. (b) Fluorescence intensity comparison of **TPP-Tet-1** and **TPP-Tet-12**. Fluorescence Histogram represent the mean intensities of 5 cytoskeleton areas (circled on the fluorescent micrographs).

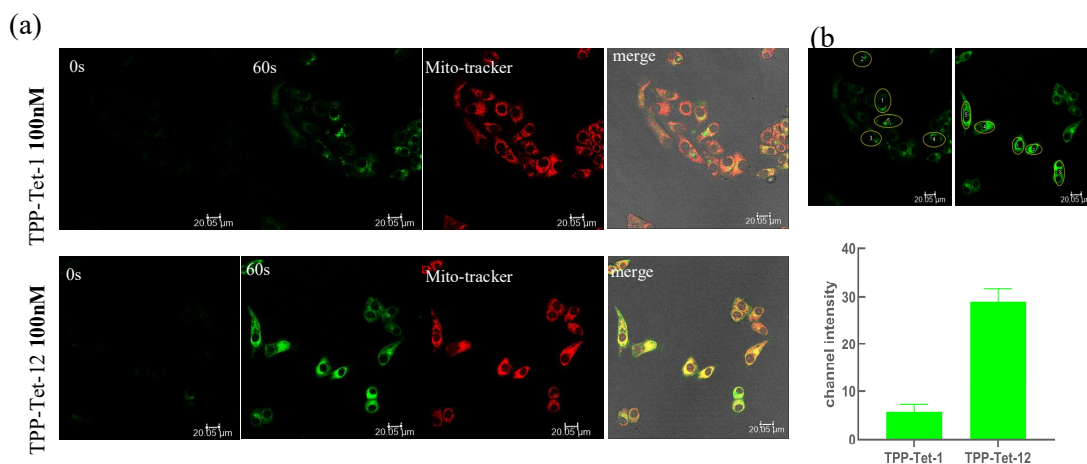

**Figure S11** (a) Confocal micrographs of mitochondria-targeting probes **TPP-Tet-1** and **TPP-Tet-12** treated Hela cells before and after 60s photoillumination with 310 nm light lamp. 100 nM photoactivatable fluorophores **TPP-Tet-1** and **TPP-Tet-12** were treated in cell culture. 500 nM photoactivatable fluorophores **TPP-Tet-1** and **TPP-Tet-12** were treated in cell culture. (b) Fluorescence intensity comparison of **TPP-Tet-1** and **TPP-Tet-12**. Fluorescence Histogram represent the mean intensities of 5 cytoskeleton areas (circled on the fluorescent micrographs).

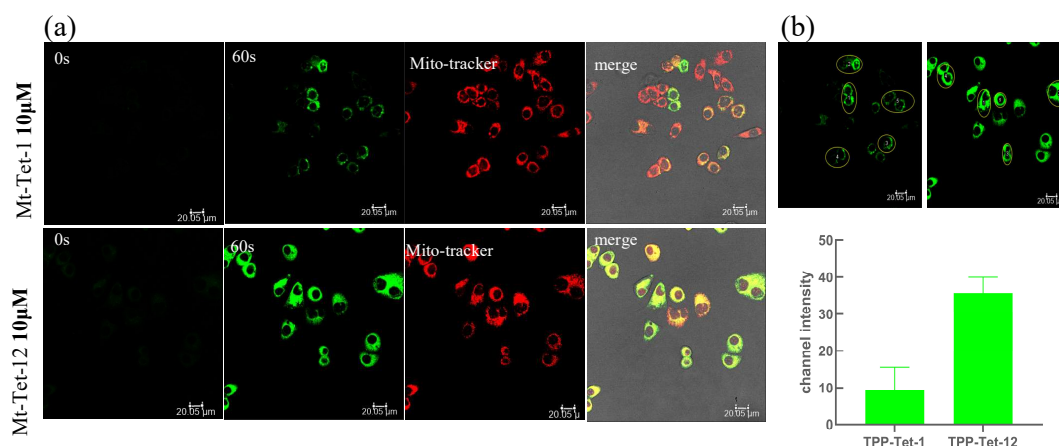

**Figure S12** (a) Confocal micrographs of mitochondria-targeting probes **TPP-Tet-1** and **TPP-Tet-12** treated Hela cells before and after 60s photoillumination with 310 nm light lamp. 10 μM photoactivatable fluorophores **TPP-Tet-1** and **TPP-Tet-12** were treated in cell culture. (b) Fluorescence intensity comparison of **TPP-Tet-1** and **TPP-Tet-12**. Fluorescence Histogram represent the mean intensities of 5 cytoskeleton areas (circled on the fluorescent micrographs).

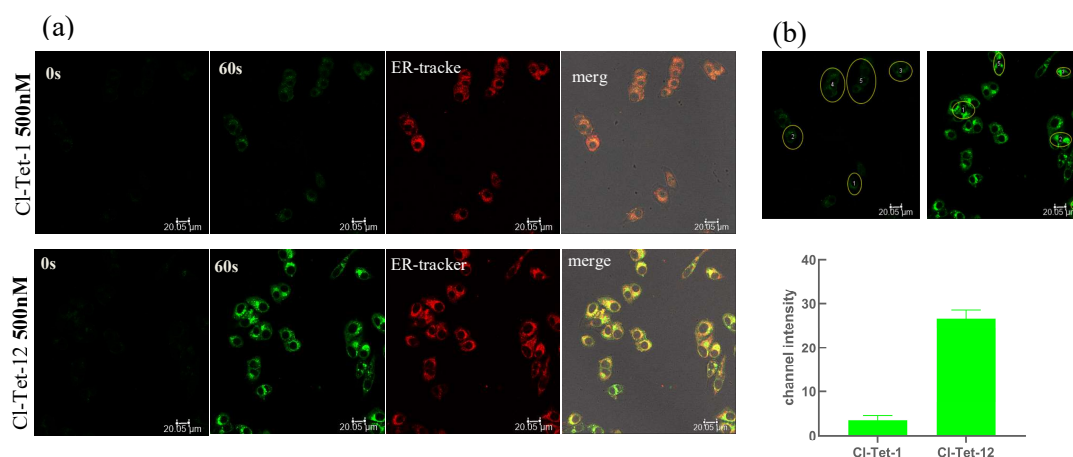

**Figure S13** (a) Confocal micrographs of ER-targeting probes **CI-Tet-1** and **CI-Tet-12** treated Hela cells before and after 60s photoillumination with 310 nm light lamp. 500 nM photoactivatable fluorophores **CI-Tet-1** and **CI-Tet-12** were treated in cell culture. (b)

Fluorescence intensity comparison of **CI-Tet-1** and **CI-Tet-12**. Fluorescence Histogram represent the mean intensities of 5 cytoskeleton areas (circled on the fluorescent micrographs).

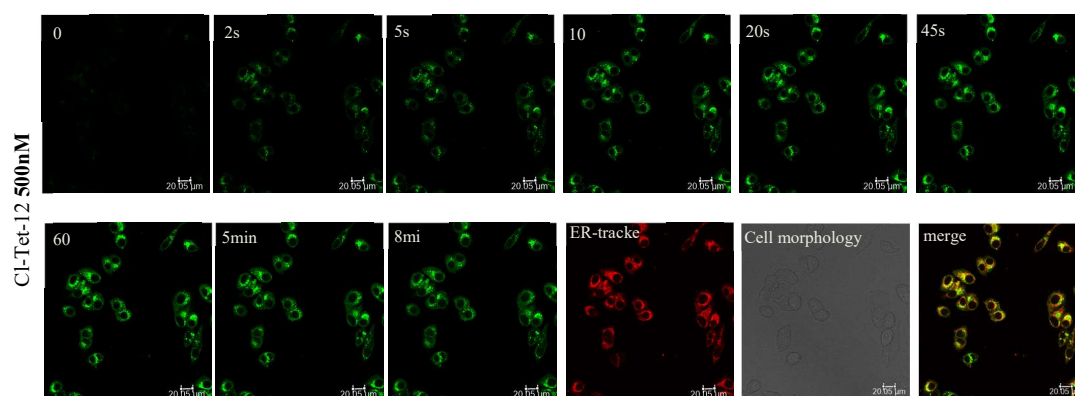

**Figure S14** Time-coursed confocal micrographs of ER-targeting probe **CI-Tet-12** treated HeLa cells after photoillumination with 310 nm light. Ex = 405. Scale bar = 20  $\mu$ m. The cell culture was treated 500 nM concentration of probe. ER-Tracker Red was used as marker for endoplasmic reticulum.

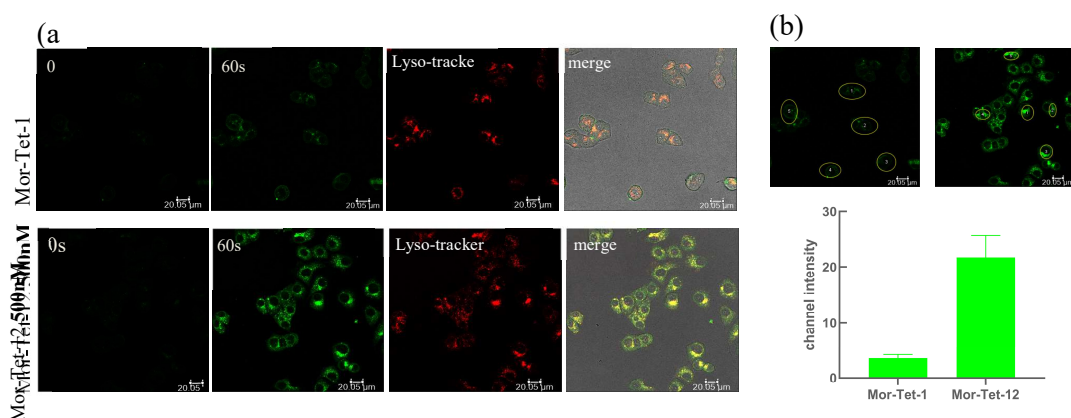

**Figure S15** (a) Confocal micrographs of Lysosome-targeting probes **Mor-Tet-1** and **Mor-Tet-12** treated HeLa cells before and after 60s photoillumination with 310 nm light lamp. 500 nM photoactivatable fluorophores **Mor-Tet-1** and **Mor-Tet-12** were treated in cell culture. (b) Fluorescence intensity comparison of **Mor-Tet-1** and **Mor-Tet-12**. Fluorescence Histogram represent the mean intensities of 5 cytoskeleton areas (circled on the fluorescent micrographs).



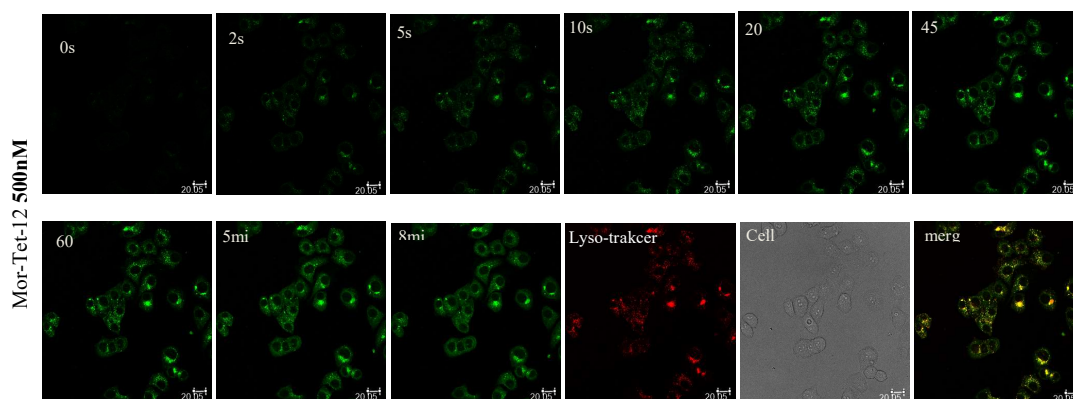

**Figure S16** Time-coursed confocal micrographs of Lysosome-targeting probe **Mor-Tet-12** treated HeLa cells after photoillumination with 310 nm light. Ex = 405. Scale bar = 20 μm. The cell culture was treated 500 nM concentration of probe. Lyso-Tracker Red was used as marker for lysosome.

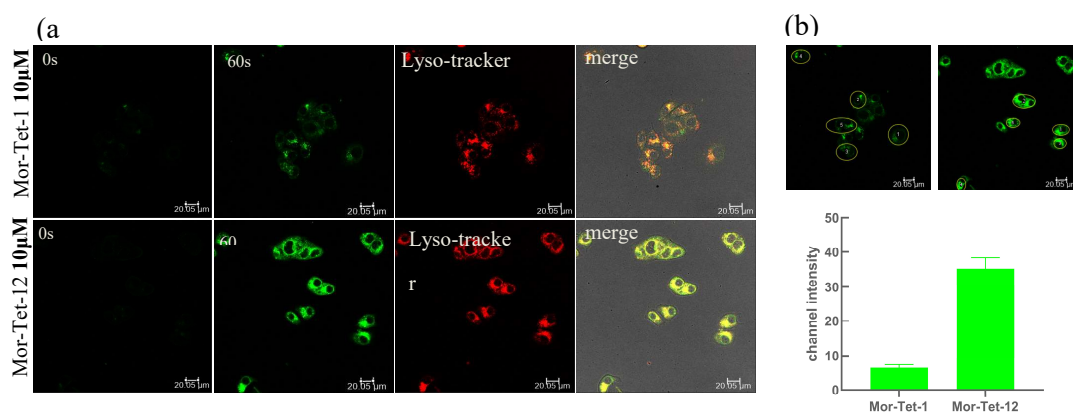

**Figure S17** (a) Confocal micrographs of Lysosome-targeting probes **Mor-Tet-1** and **Mor-Tet-12** treated HeLa cells before and after 60s photoillumination with 310 nm light lamp. 10 μM photoactivatable fluorophores **Mor-Tet-1** and **Mor-Tet-12** were treated in cell culture. (b) Fluorescence intensity comparison of **Mor-Tet-1** and **Mor-Tet-12**. Fluorescence Histogram represent the mean intensities of 5 cytoskeleton areas (circled on the fluorescent micrographs).

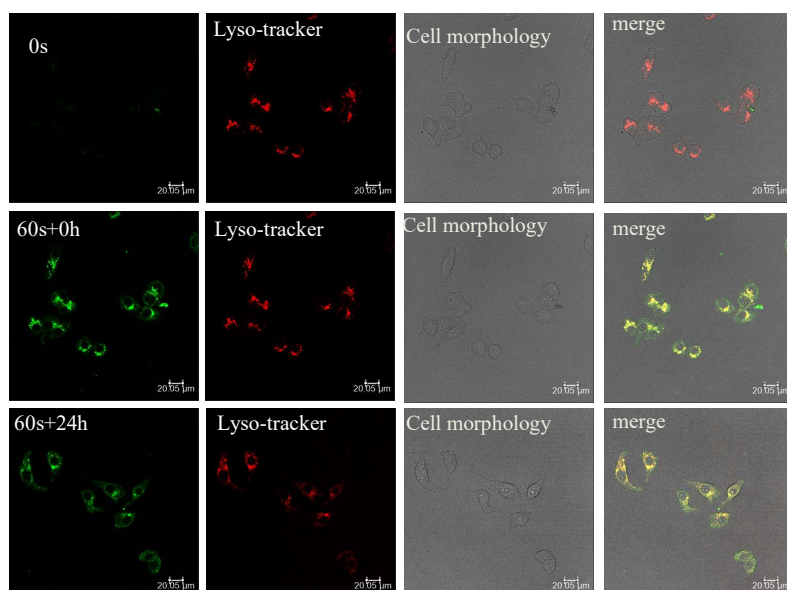

**Figure S18** Confocal micrographs of Lysosome-targeting probes **Mor-Tet-12** (500 nmol/L) treated HeLa cells before and after 60s photoillumination with 310 nm light lamp. After photoillumination, HeLa cells were incubated for 24 hours and live cell images were acquired on a confocal microscope.

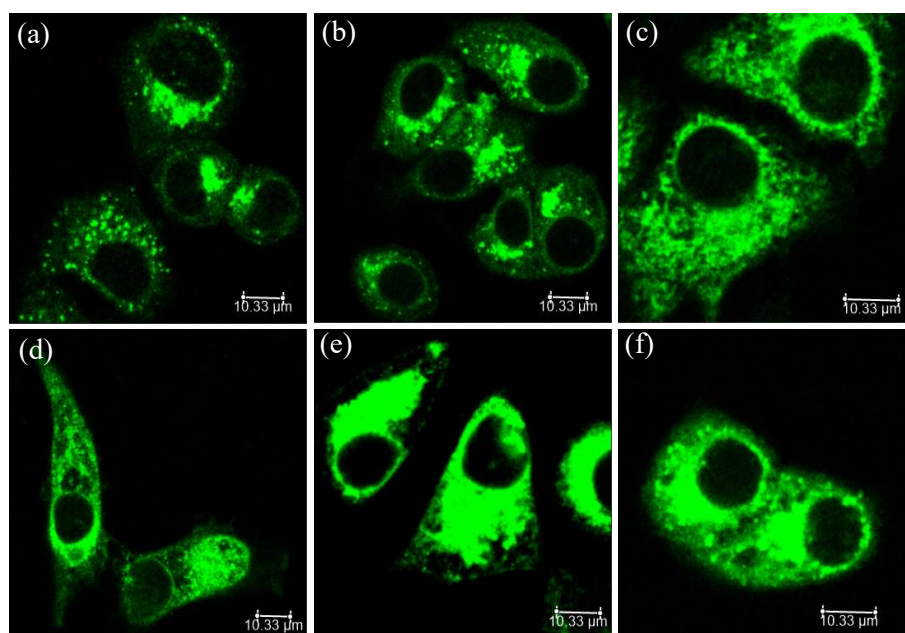

**Figure S19** Confocal micrographs of Lysosome-targeting probes **Mor-Tet-12**, **TPP-Tet-12** and **Cl-Tet-12** treated HeLa cells before and after 60s photoillumination with 310 nm light lamp. (a) Area of confocal micrograph of **Mor-Tet-12** (500 nmol/L). (b) Area of confocal micrograph of **Cl-Tet-12** (500 nmol/L). (c) Area of confocal micrograph of **TPP-Tet-12** (500 nmol/L). (d) Area of confocal micrograph of **TPP-Tet-12** (100 nmol/L). (e) Area of confocal

micrograph of **TPP-Tet-12** (10  $\mu\text{mol/L}$ ). (f) Area of confocal micrograph of **Mor-Tet-12** (10  $\mu\text{mol/L}$ ).

### Supplemental Methods

Fluorescent quantum yield:

Fluorescent quantum yield determination: Quantum yields measurements were determined using Quinine sulfate (fluorescence quantum yield of 0.54 in  $\text{H}_2\text{SO}_4$  0.1  $\text{M}^{[1]}$ ) as a standard.

The fluorescence quantum yield,  $\Phi_{f, \text{sample}}$  were calculated according to equation as following:

$$\Phi_{f, \text{sample}} = (\text{OD}_{\text{standard}} / \text{OD}_{\text{sample}}) (\text{I}_{\text{sample}} / \text{I}_{\text{standard}}) (\text{d}_{\text{standard}}^2 / \text{d}_{\text{sample}}^2) \Phi_{f, \text{standard}}$$

$\Phi_{f, \text{sample}}$  = fluorescent quantum yield;

I: = Integrated emission intensity;

OD: optical density at the excitation wavelength;

d: refractive index of solvents,  $\text{d}_{\text{CH}_3\text{CN}}=1.34$ ;  $\text{d}_{\text{water}}=1.33$ .

Cell Culture:

Hela cells were allowed to grow to about 70-80% confluency in DMEM medium supplemented with 10% FBS and 1% Penicillin-Streptomycin on 35-mm culture dishes pre-installed with a glass cover-slip at the bottom. All probes were prepared as 10 mmol/L stock solutions in DMSO. The stock solutions were diluted with media when used in cell culture. For mitochondria, **TPP-Tet-1** and **TPP-Tet-12** were individually incubated at 100 nM, 500 nM, 10  $\mu\text{M}$ , **MitoTracker® Red CMXRos** was prepared as 200  $\mu\text{M/L}$  stock solution in DMSO. Then it was incubated at 50 nM as Mito-tracker. **CI-Tet-1** and **CI-Tet-12** were individually incubated at 500 nM, **ER-Tracker Red** was prepared as 1  $\mu\text{M/L}$  stock solution. Then it was incubated at 50 nM as ER-tracker. **Mor-Tet-1** and **Mor-Tet-12** were individually incubated at 500 nM, 10  $\mu\text{M}$ , **LysoTracker™ Red DND-99** was prepared as 10  $\mu\text{M/L}$  stock solution in DMSO. Then it was incubated at 50 nM as Lyso-tracker. All the tetrazole probes were cultured for three hours and the standard tracker were cultured for 1 hours. Finally, the cells were washed with prewarmed PBS for three times. For the sample was then placed underneath the confocal microscope for photoactivation followed by 310 nm UV lamp. The imaging acquisitions were carried out using a Leica TCS SP8 STED confocal microscope equipped with a continuous laser and fluorescence lifetime (FLIM) detector. Excitation and emission wavelengths are shown below: green channel:  $\lambda_{\text{ex}} = 405 \text{ nm}$ ,  $\lambda_{\text{em}} = 450\text{--}570 \text{ nm}$ , red channel  $\lambda_{\text{ex}} = 570 \text{ nm}$ ,  $\lambda_{\text{em}} = 583\text{--}673 \text{ nm}$ . The data quantifications were carried out using the Leica application Suite X, NIH Image J program. **MitoTracker® Red CMXRos** (C1035), **ER-Tracker Red** (C1041), **LysoTracker™ Red DND-99** (C1046) were purchased from beyotime.

Cell viability:



Hela cells were allowed to grow to about 70-80% confluency in DMEM medium supplemented with 10% FBS and 1% Penicillin-Streptomycin on the bottom of a 96-well plate. **Tet-12** and **Pyr-12** were prepared as 10mmol/L stock solution in DMSO. Then they were diluted with media and incubated at varied concentrations: 100 nmol/L, 500 nmol/L, 1  $\mu$ M/L, 10  $\mu$ M/L, 20  $\mu$ M/L, 50  $\mu$ M/L. Keep about 100uL of medium in each well. All samples were cultured for 24 hours. After 24 hours, 10 uL MTT solution (5mg/ml) was added to sample. After four hours, 100 uL Formazan solution was added to solute formazan crystal. When the formazan crystal was all soluted, the UV absorption of the samples was measured at 570 nm by microplate photometer (Thermo Scientific Multiskan FC). Mtt solution and formazan solution were purchased from beyotime (C009S).

### General Information

Solvents and chemicals were purchased from commercial sources and used directly without further purification. Petroleum ether (PE) used had a boiling range of 60–90 °C. Reactions were monitored by TLC on silica gel GF 254 plates. Column chromatography was generally performed through silica gel (200–300 mesh). <sup>1</sup>H NMR spectra were recorded with Bruker-600 and Bruker-400 MHz spectrometers. Chemical shifts were reported in ppm using TMS or deuterated solvents as internal standards (TMS, 0.00; CDCl<sub>3</sub>, 7.26; CD<sub>3</sub>OD, DMSO-*d*<sub>6</sub>, 2.50). Multiplicity was reported as follows: s = singlet, d = doublet, t = triplet, q = quartet, m = multiplet, brs = broad. <sup>13</sup>C NMR spectra were recorded at 150 MHz and 103 MHz, and chemical shifts were reported in ppm using deuterated solvents as internal standards (CDCl<sub>3</sub>, 77.0; DMSO-*d*<sub>6</sub>, 39.5). UV-Vis absorption spectra were recorded using 1-cm quartz cuvette on a Shimadzu-UV-2600. Fluorescence spectra were recorded using 1-cm quartz cuvette on a Gangdong F-320 spectrofluorometer at 25 °C. High resolution mass spectrometry was performed on a Thermo LTQ-Orbitrap XL mass spectrometer equipped with collision cells for collision induced dissociation. Single crystal was measured by X-ray single crystal diffractometer (D8 VENTURE).

### Experimental Synthesis Procedures and Characterization Data

Scheme S1

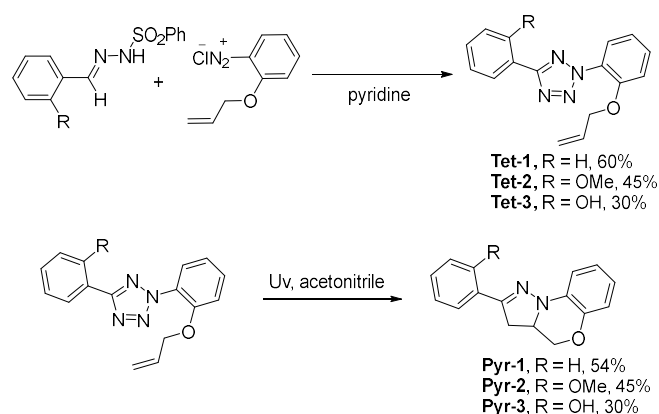

**2-(2-(allyloxy)phenyl)-5-phenyl-2H-tetrazole (Tet-1):** Compound **Tet-1** was synthesized as a brown solid with 60% yield. The data and procedure was identical as previous reported<sup>[2]</sup>

**2-(2-(Allyloxy)phenyl)-5-(2-methoxyphenyl)-2H-tetrazole (Tet-2):** The allyloxy diazonium salt was prepared in the same synthetic procedure as **Tet-1** using 2-(allyloxy) aniline as starting material. In the same way as **Tet-1**, the **Tet-2** was synthesized as colorless solid in 45% yield: <sup>1</sup>H NMR (600 MHz, CDCl<sub>3</sub>) δ 8.07 (dd, *J* = 9.0 Hz, 2.0 Hz, 1H), 7.63 (dd, *J* = 9.0 Hz, 2.0 Hz, 1H), 7.51–7.46 (m, 2H), 7.13–7.10 (m, 3H), 7.08 (d, *J* = 12.0 Hz, 1H), 5.99–5.92 (m, 1H), 5.36 (dd, *J* = 18.0 Hz, 3.0 Hz, 1H), 5.22 (dd, *J* = 12.0 Hz, 3.0 Hz, 1H), 4.63 (d, *J* = 3.0 Hz, 2H), 3.96 (s, 3H); <sup>13</sup>C NMR (150 MHz, CDCl<sub>3</sub>) δ 162.94, 157.59, 152.56, 132.07, 131.63, 131.51, 130.82, 128.47, 127.05, 120.81, 120.65, 117.53, 114.19, 111.82, 111.79, 69.59, 55.96; HRMS calcd for C<sub>17</sub>H<sub>17</sub>N<sub>4</sub>O<sub>2</sub> 309.1346 [M+H<sup>+</sup>], found 309.1345.

**2-(2-(2-(Allyloxy)phenyl)-2H-tetrazol-5-yl)phenol (Tet-3):** **Tet-3** was synthesized as a colorless solid with 30% yield using the same synthetic procedure as **Tet-1**: <sup>1</sup>H NMR (600 MHz, CDCl<sub>3</sub>) δ 9.74 (s, 1H), 8.17 (d, *J* = 9.0 Hz, 1H), 7.63 (dd, *J* = 9.0 Hz, 2.0 Hz, 1H), 7.52 (t, *J* = 6.0 Hz, 1H), 7.38 (t, *J* = 6.0 Hz, 1H), 7.15–7.11 (m, 3H), 7.02 (t, *J* = 6.0 Hz, 1H), 5.97–5.91 (m, 1H), 5.33 (dd, *J* = 18.0 Hz, 3.0 Hz, 1H), 5.23 (d, *J* = 6.0 Hz, 1H), 4.63 (d, *J* = 3.0 Hz, 2H); <sup>13</sup>C NMR (150 MHz, CDCl<sub>3</sub>) δ 163.82, 156.51, 152.44, 132.28, 132.23, 131.92, 127.59, 126.85, 126.29, 121.03, 120.12, 118.07, 117.61, 114.31, 111.26, 69.76; HRMS calcd for C<sub>16</sub>H<sub>15</sub>N<sub>4</sub>O<sub>2</sub> 295.1190 [M+H<sup>+</sup>], found 295.1189.

**2-phenyl-3a,4-dihydro-3H-benzo[b]pyrazolo[1,5-d][1,4]oxazine (Pyr-1):** To a solution of **Tet-1** (150 mg, 0.54 mmol) in acetonitrile (40 mL) in a quartz botter, the reaction mixture was irradiated with 310 nm UV light by using the UV-lamp. Upon the tetrazole was completely converted to pyrazoline product (checked by TLC), the mixture was concentrated and purified by silica gel flash chromatography using ethyl acetate/ Petroleum ether as eluent to give the title product as a brown solid (74mg, 54%). The data and procedure was identical as previous reported<sup>[2]</sup>

**2-(2-Methoxyphenyl)-3a,4-dihydro-3H-benzo[b]pyrazolo[1,5-d][1,4]oxazine (Pyr-2):**

**Pyr-2** was synthesized as a light yellow solid with 92% yield using the same synthetic procedure as **Pyr-1**: <sup>1</sup>H NMR (600 MHz, CDCl<sub>3</sub>) δ 7.83 (dd, *J* = 9.0 Hz, 3.0 Hz, 1H), 7.57 (dd, *J* = 9.0 Hz, 3.0 Hz, 1H), 7.25 (td, *J* = 9.0 Hz, 3.0 Hz, 1H), 6.96–6.84 (m, 3H), 6.86–6.82 (m, 2H), 4.06–4.02 (m, 1H), 3.75 (s, 3H), 3.48–3.38 (m, 2H), 3.12 (dd, *J* = 12.0 Hz, 6.0 Hz, 1H); <sup>13</sup>C NMR (150 MHz, CDCl<sub>3</sub>) δ 157.40, 149.43, 144.74, 131.50, 130.24, 128.82, 121.56, 121.51, 121.19, 120.71, 120.62, 116.87, 111.24, 64.89, 56.23, 55.19, 38.51; HRMS calcd for C<sub>17</sub>H<sub>17</sub>N<sub>2</sub>O<sub>2</sub> 281.1285 [M+H<sup>+</sup>], found 281.1284.

**2-(3a,4-Dihydro-3H-benzo[b]pyrazolo[1,5-d][1,4]oxazin-2-yl)phenol (Pyr-3):** **Pyr-3** was synthesized as a light yellow solid with 90% yield using the same synthetic procedure as **Pyr-1**: <sup>1</sup>H NMR (600 MHz, CDCl<sub>3</sub>) δ 10.65 (s, 1H), 7.44 (d, *J* = 9.0 Hz, 1H), 7.24 (t, *J* = 9.0 Hz, 1H), 7.14 (dd, *J* = 9.0 Hz, 3.0 Hz, 1H), 7.00–6.97 (m, 2H), 6.93–6.92 (m, 2H), 6.88 (td, *J*

= 9.0 Hz, 3.0 Hz, 1H), 4.14–4.07 (m, 2H), 4.45 (dd,  $J = 12.0$  Hz, 9.0 Hz, 1H), 3.37 (t,  $J = 9.0$  Hz, 2H), 3.34 (dd,  $J = 12.0$  Hz, 3.0 Hz, 1H);  $^{13}\text{C}$  NMR (150 MHz,  $\text{CDCl}_3$ )  $\delta$  157.31, 151.87, 144.94, 130.79, 130.70, 127.47, 122.68, 121.90, 120.80, 119.26, 117.28, 116.65, 115.73, 64.70, 54.80, 35.91; HRMS calcd for  $\text{C}_{16}\text{H}_{15}\text{N}_2\text{O}_2$  267.1128  $[\text{M}+\text{H}^+]$ , found 267.1125.

### Scheme S2

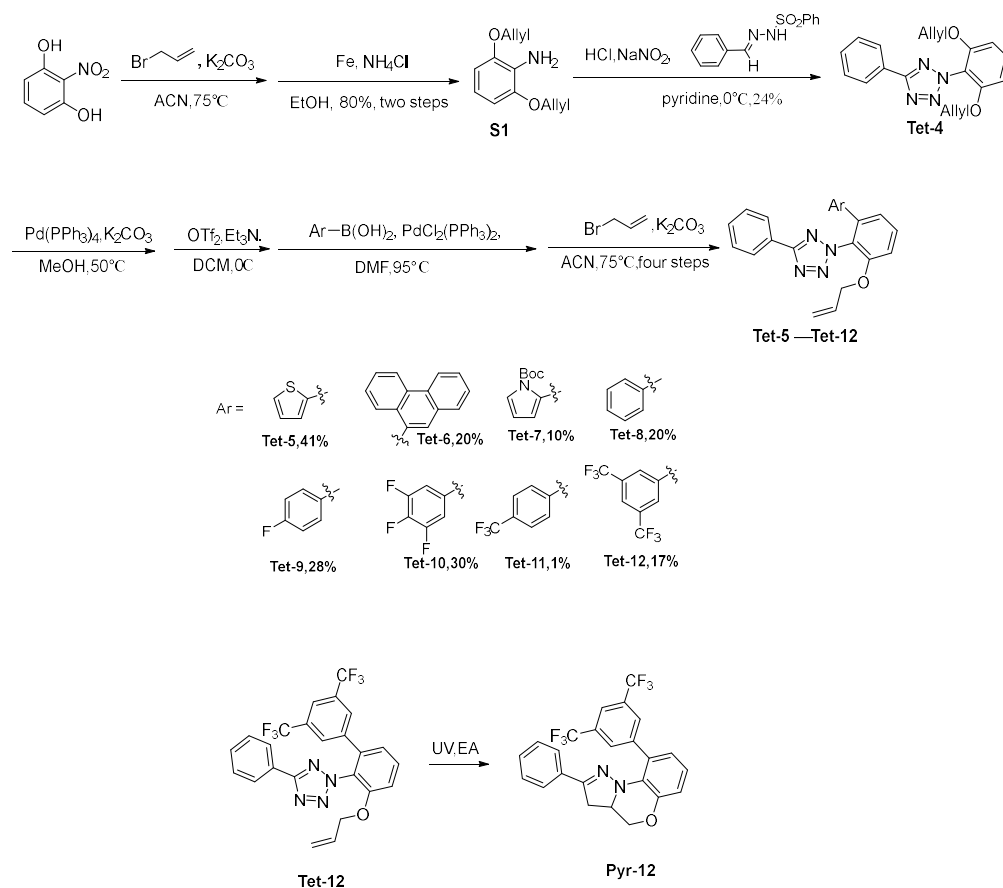

**2,6-(diallyloxy)aniline (S1): preparation of 2,6-(diallyloxy)nitrobenzene:** to a solution of nitro-1,3-benzenediol (8.01 g, 0.052 mol) in acetonitrile was added 3-bromopropene (10 ml, 0.104 mol) and  $\text{K}_2\text{CO}_3$  (22.02 g, 0.156 mol), and the mixture was stirred at 75 °C for 5 hours. The mixture was filtered and the solvent was removed. The crude nitrobenzene product was used in the next step. **Preparation of 2,6-(diallyloxy)aniline:** to a solution of above synthesized nitrobenzene in ethanol was added iron powder reduced (10.92 g, 0.195 mol). Ammonium chloride was dissolved in water (20ml) and the  $\text{NH}_4\text{Cl}$  aqueous solution (40 mg/ml) was added to the nitrobenzene suspension. The mixture was stirred at 90 °C for 8 hours. Then the mixture was filtered and extracted with ethyl acetate (100 ml  $\times$  3) and water. Solvent was evaporated under reduced pressure to obtain product (8.21 g, 80%) as black oil. The crude product was used in the next step. The data was identical as previous reported<sup>[3]</sup>

**5-phenyl-2-(2,6-diallyloxyphenyl)-2H-tetrazole (Tet-4): Preparation of diazonium salt:** to a mixed solution of 2,6-(diallyloxy)aniline (8 g, 0.04 mol) in ethanol/water (2:1, 120 ml) cooled with ice-water bath was added sequentially 100mL concentrated HCl and 20 ml sodium nitrite

(3.26 g, 0.048 mol) solution in water were added dropwise and the mixture was stirred for about 10min at ice-water bath. Preparation of tetrazole: to a solution of aboved synthesized sulfohydrazone (in **Tet-1**) (11.44g, 0.04mol) in pyridine (150ml) cooled with an ice-salt bath was slowly added the freshly prepared diazonium salt, and the mixture was stirred while temperature was allowed to gradually increase to room temperature. After about 8 hours, the reaction mixture was washed with 1 N HCl (150 ml) and extracted with ethyl acetate (150 ml  $\times$  3) and water. The organic phase was dried over anhydrous Na<sub>2</sub>SO<sub>4</sub> and purified by silica gel flash chromatography using ethyl acetate/ Petroleum ether as eluent to give the title product (3.125 g, 24%), as a dark yellow solid: <sup>1</sup>H NMR (400 MHz, CDCl<sub>3</sub>)  $\delta$  8.26 (dd,  $J$  = 8.2 Hz, 1.7 Hz, 2H), 7.53–7.47 (m, 3H), 7.41 (t,  $J$  = 8.5 Hz, 1H), 6.67 (d,  $J$  = 8.6 Hz, 2H), 5.88–5.79 (m, 2H), 5.19 (dd,  $J$  = 17.3 Hz, 1.6Hz, 2H), 5.14 (dd,  $J$  = 10.7 Hz, 1.5 Hz, 2H), 4.53 (dt,  $J$  = 5.0 Hz, 1.7 Hz, 4H); <sup>13</sup>C NMR(101 MHz, CDCl<sub>3</sub>)  $\delta$  164.84, 155.47, 132.31, 132.03, 130.22, 128.87, 127.67, 127.04, 117.65, 116.29, 105.73, 69.08; HRMS calcd for C<sub>19</sub>H<sub>19</sub>N<sub>4</sub>O<sub>2</sub> 335.1508 [M+H<sup>+</sup>], found 335.1503.

**5-phenyl-2-(2-allyloxy-6-(thiophen-2-yl))phenyl-2H-tetrazole (Tet-5):** Preparation of 2-(5-phenyl-2H-tetrazol-2-yl)benzene-1,3-diol: to a solution of compound **Tet-4** (400 mg, 1.2 mmol) in methanol was added Pd(PPh<sub>3</sub>)<sub>4</sub> (14 mg, 0.012 mmol) and K<sub>2</sub>CO<sub>3</sub>(500 mg, 3.6 mmol). The mixture was done carefully gas exchange to argon and stirred at 50 °C for 3 hours. Then the reaction was filtered to obtain the crude product as brown solid. The crude product was used in the next step.

Preparation of 3-hydroxy-2-(5-phenyl-2H-tetrazol-2-yl)phenyl trifluoromethanesulfonate: to a solution of aboved crude product (1.2 mmol) in DCM cooled with ice-water bath was added triethylamine (398  $\mu$ L, 2.88 mmol). Then trifluoromethanesulfonic anhydride (243  $\mu$ L, 1.44 mmol) was added to the mixture. The reaction was stirred for about 2 hours at ice-water bath. Then the mixture was extracted with DCM (60 ml  $\times$  3) and water. After the solvent was removed, the crude product was brown oil, the crude product was used in next step.

Preparation of 2-(5-phenyl-2H-tetrazol-2-yl)-3-(thiophen-2-yl)phenol: to a solution of aboved crude product (1.2 mmol) in DMF was added phenylboronic acid (1.8 mmol, 230mg) and PdCl<sub>2</sub>(PPh<sub>3</sub>)<sub>2</sub> (0.05 mmol, 42 mg). K<sub>2</sub>CO<sub>3</sub> (3.6 mmol, 497 mg) was added in the solvent too. The mixture was done carefully gas exchange to argon and stirred at 95 °C for 6 hours. After about 6 hours, the mixture was extracted with ethyl acetate (40 ml  $\times$  3) and NH<sub>4</sub>Cl aqueous solution (40 mg/ml). After the solvent was removed, the crude product was brown oil and used in the next step.

Preparation of 5-phenyl-2-(2-allyloxyphenyl-6-phenyl)phenyl-2H-tetrazole: to a solution of aboved crude product (1.2 mmol) in acetonitrile was added 3-bromopropene (2.4 mmol, 173  $\mu$ L) and K<sub>2</sub>CO<sub>3</sub> (3.6 mmol, 497 mg). The mixture was stirred at 75°C for 3 hours. After about 3 hours the mixture was purified by silica gel flash chromatography using ethyl acetate/ Petroleum ether as eluent to give the title product (187 mg, 41%): <sup>1</sup>H NMR (400 MHz, CDCl<sub>3</sub>)  $\delta$  8.22 (dd,  $J$  = 7.9 Hz, 2.2 Hz, 2H), 7.55–7.48 (br, 4H), 7.32 (d,  $J$  = 7.9 Hz, 1H), 7.20 (d,  $J$  = 5.1 Hz, 1H), 7.04 (d,  $J$  = 8.4 Hz, 1H), 6.85 (t,  $J$  = 3.7 Hz, 1H), 6.73 (dd,  $J$  = 3.7 Hz, 1.3 Hz, 1H), 5.87–5.78 (m, 1H), 5.18 (dd,  $J$  = 15.7 Hz, 1.6 Hz, 1H), 5.15 (dd,  $J$  = 9.1 Hz, 1.5Hz, 1H),

4.56 (d, 4.9 Hz, 2H);  $^{13}\text{C}$  NMR (101 MHz,  $\text{CDCl}_3$ )  $\delta$  165.03, 155.08, 137.65, 134.32, 132.15, 131.83, 130.39, 128.91, 127.59, 127.42, 127.09, 126.85, 124.08, 122.07, 117.75, 112.47, 69.57; HRMS calcd for  $\text{C}_{20}\text{H}_{16}\text{N}_4\text{OSNa}$  383.0943  $[\text{M}+\text{Na}^+]$ , found 383.0940.

**5-phenyl-2-(2-allyloxy-6-(9-Phenanthrene-yl))phenyl-2H-tetrazole(Tet-6):** Tetrazole **Tet-6** was synthesized as a brown solid with 20% yield using the same synthetic procedure as tetrazole **Tet-5**:  $^1\text{H}$  NMR (400 MHz,  $\text{CDCl}_3$ )  $\delta$  8.58 (d,  $J = 8.2$  Hz, 1H), 8.54 (d  $J = 8.2$  Hz, 1H), 7.86 (dd,  $J = 7.4$  Hz, 2.3 Hz), 7.78 (d,  $J = 8.0$  Hz, 1H), 7.75 (d,  $J = 7.5$  Hz, 1H), 7.64 (s, 1H), 7.61–7.47 (m, 5H), 7.30 (d,  $J = 2.6$  Hz, 2H), 7.29 (s, 1H), 7.17 (t,  $J = 6.6$  Hz, 2H), 5.91–5.81 (m, 1H), 5.22 (d,  $J = 17.3$  Hz, 1H), 5.15 (d,  $J = 10.6$  Hz, 1H), 4.60 (d,  $J = 4.9$  Hz, 2H);  $^{13}\text{C}$  NMR (101 MHz,  $\text{CDCl}_3$ )  $\delta$  164.17, 154.47, 140.28, 132.72, 131.97, 131.64, 130.80, 130.67, 130.56, 130.20, 130.02, 128.83, 128.65, 128.38, 127.75, 127.29, 127.00, 126.96, 126.84, 126.81, 126.62, 126.52, 126.37, 123.86, 122.67, 122.47, 117.78, 112.79, 69.63; HRMS calcd for  $\text{C}_{30}\text{H}_{23}\text{N}_4\text{O}$  455.1872  $[\text{M}+\text{H}^+]$ , found 455.1866.

**5-phenyl-2-(2-allyloxy-6-(N-Boc-H-pyrrol-2-yl))phenyl-2H-tetrazole(Tet-7):** Tetrazole **Tet-7** was synthesized as a brown solid with 10% yield using the same synthetic procedure as tetrazole **Tet-5**:  $^1\text{H}$  NMR (400 MHz,  $\text{CDCl}_3$ )  $\delta$  8.12 (dd,  $J = 7.9$  Hz, 2.1 Hz, 2H), 7.52–7.44 (m, 4H), 7.18 (q,  $J = 1.7$  Hz, 1H), 7.11 (d,  $J = 1.6$  Hz, 1H), 7.09 (d,  $J = 2.2$  Hz, 1H), 6.05 (q,  $J = 1.7$  Hz, 1H), 6.00 (t,  $J = 3.2$  Hz, 1H), 5.90–5.81 (m, 1H), 5.22 (dd,  $J = 17.3$  Hz, 1.6 Hz, 1H), 5.16 (dd,  $J = 10.7$  Hz, 1.5 Hz, 1H), 4.58 (d,  $J = 5.0$  Hz, 2H), 1.36 (s, 9H);  $^{13}\text{C}$  NMR (101 MHz,  $\text{CDCl}_3$ )  $\delta$  164.35, 153.79, 148.76, 134.98, 132.05, 130.82, 130.13, 128.80, 127.56, 127.32, 126.97, 126.39, 123.69, 122.30, 117.68, 115.41, 113.10, 110.37, 83.69, 69.68, 27.57; HRMS calcd for  $\text{C}_{25}\text{H}_{25}\text{N}_5\text{O}_3\text{Na}$  466.1855  $[\text{M}+\text{Na}^+]$ , found 466.1846.

**5-phenyl-2-(2-allyloxy-6-phenyl)phenyl-2H-tetrazole(Tet-8):** Tetrazole **Tet-8** was synthesized as a brown solid with 20% yield using the same synthetic procedure as tetrazole **Tet-5**:  $^1\text{H}$  NMR (400 MHz,  $\text{CDCl}_3$ )  $\delta$  8.13 (dd,  $J = 7.9$  Hz, 2.0 Hz, 2H), 7.52 (t,  $J = 8.0$  Hz), 7.40–7.46 (m, 3H), 7.18 (s, 5H), 7.12 (dd,  $J = 7.8$  Hz, 1.28 Hz, 2H), 7.05 (dd,  $J = 8.6$  Hz, 1.36 Hz, 1H), 5.77–5.86 (m, 1H), 5.18 (dd,  $J = 17.2$  Hz, 1.52 Hz, 2H), 5.13 (dd,  $J = 12.0$  Hz, 1.52 Hz, 2H), 4.54 (d,  $J = 4.92$  Hz, 2H);  $^{13}\text{C}$  NMR (101 MHz,  $\text{CDCl}_3$ )  $\delta$  164.59, 154.48, 141.59, 136.94, 131.98, 130.29, 128.87, 128.34, 127.99, 127.46, 127.01, 124.94, 122.61, 117.67, 112.44, 69.56; HRMS calcd for  $\text{C}_{20}\text{H}_{16}\text{N}_4\text{OSNa}$  377.1378  $[\text{M}+\text{Na}^+]$ , found 377.1370.

**5-phenyl-2-(2-allyloxy-6-(4-fluorophenyl))phenyl-2H-tetrazole(Tet-9):** Tetrazole **Tet-9** was synthesized as a brown solid with 28% yield using the same synthetic procedure as tetrazole **Tet-5**:  $^1\text{H}$  NMR (400 MHz,  $\text{CDCl}_3$ )  $\delta$  8.16–8.11 (dd,  $J = 7.9$  Hz, 3.4 Hz, 2H), 7.55 (t,  $J = 8.2$  Hz, 1H), 7.48–7.45 (m, 2H), 7.18–7.12 (m, 2H), 7.10 (t,  $J = 7.8$  Hz, 2H), 6.89 (t,  $J = 8.7$  Hz, 2H), 5.89–5.79 (m, 1H), 5.20 (dd,  $J = 17.3$  Hz, 1.6 Hz, 1H), 5.16 (dd,  $J = 10.7$  Hz, 1.5 Hz, 1H), 4.57 (d,  $J = 4.9$  Hz, 2H);  $^{13}\text{C}$  NMR (101 MHz,  $\text{CDCl}_3$ )  $\delta$  164.69, 163.74, 161.27, 154.54, 140.58, 132.90, 132.01, 131.88, 130.35, 130.15, 130.06, 128.89, 127.31, 126.99, 124.96, 122.49, 117.75, 115.48, 115.27, 112.57, 69.59; HRMS calcd for  $\text{C}_{22}\text{H}_{18}\text{FN}_4\text{O}$  373.1465  $[\text{M}+\text{H}^+]$ , found 373.1460.

**5-phenyl-2-(2-allyloxy-6-(3,4,5-trifluorophenyl))phenyl-2H-tetrazole(Tet-10):** Tetrazole **Tet-10** was synthesized as a brown solid with 30% yield using the same synthetic procedure

as tetrazole **Tet-5**:  $^1\text{H}$  NMR (400 MHz,  $\text{CDCl}_3$ )  $\delta$  8.15 (dd,  $J = 7.9$  Hz, 3.3 Hz, 2H), 7.59 (t,  $J = 8.3$  Hz, 1H), 7.51–7.48 (m, 3H), 7.14 (d,  $J = 8.5$  Hz, 1H), 7.07 (dd,  $J = 7.9$  Hz, 1.4 Hz, 1H), 6.85 (t,  $J = 6.4$  Hz, 2H), 5.89–5.80 (m, 1H), 5.23–5.16 (m, 2H), 4.59 (d,  $J = 5.0$  Hz, 2H);  $^{13}\text{C}$  NMR (101 MHz,  $\text{CDCl}_3$ )  $\delta$  164.98, 154.67, 152.15, 152.10, 152.05, 152.01, 149.65, 149.61, 149.55, 149.51, 141.04, 140.89, 140.74, 138.50, 138.37, 138.22, 132.83, 132.78, 132.33, 131.65, 130.53, 128.95, 127.03, 124.72, 122.04, 117.96, 113.51, 113.04, 112.97, 112.88, 112.81, 69.67; HRMS calcd for  $\text{C}_{22}\text{H}_{16}\text{F}_3\text{N}_4\text{O}$  409.1276 [ $\text{M}+\text{H}^+$ ], found 409.1266.

**5-phenyl-2-(2-allyloxy-6-(4-(trifluoromethyl)phenyl))phenyl-2H-tetrazole(Tet-11):**

Tetrazole **Tet-11** was synthesized as a brown solid with 13% yield using the same synthetic procedure as tetrazole **Tet-5**:  $^1\text{H}$  NMR (400 MHz,  $\text{CDCl}_3$ )  $\delta$  8.12 (dd,  $J = 7.7$  Hz, 3.4 Hz, 2H), 7.61 (t,  $J = 8.3$  Hz, 1H), 7.49–7.46 (m, 5H), 7.33 (s, 1H), 7.31 (s, 1H), 7.14 (dd,  $J = 6.4$  Hz, 1.4 Hz, 1H), 7.12 (dd,  $J = 5.6$  Hz, 1.2 Hz, 1H), 5.90–5.81 (m, 1H), 5.24–5.16 (m, 2H), 4.60 (dt,  $J = 4.9$  Hz, 1.7 Hz, 2H);  $^{13}\text{C}$  NMR (101 MHz,  $\text{CDCl}_3$ )  $\delta$  164.79, 154.62, 140.55, 140.08, 132.20, 131.77, 130.42, 130.27, 129.95, 128.90, 128.78, 127.19, 127.01, 125.36, 125.32, 125.29, 125.25, 124.85, 122.36, 117.87, 113.21, 69.66; HRMS calcd for  $\text{C}_{23}\text{H}_{18}\text{F}_3\text{N}_4\text{O}$  423.1433 [ $\text{M}+\text{H}^+$ ], found 423.1422.

**5-phenyl-2-(2-allyloxy-6-(3,5-bis(trifluoromethyl)phenyl))phenyl-2H-tetrazole(Tet-12):**

Tetrazole **Tet-12** was synthesized as a brown solid with 17% yield using the same synthetic procedure as tetrazole **Tet-5**:  $^1\text{H}$  NMR (400 MHz,  $\text{CDCl}_3$ )  $\delta$  8.13 (dd,  $J = 8.1$  Hz, 2.6 Hz, 2H), 7.74 (s, 1H), 7.70 (s, 2H), 7.62 (t,  $J = 8.4$  Hz, 1H), 7.48–7.45 (m, 3H), 7.20 (dd,  $J = 8.5$  Hz, 1.3 Hz, 1H), 7.16 (dd,  $J = 7.9$  Hz, 1.3 Hz, 1H), 5.23 (dd,  $J = 17$  Hz, 1.6 Hz, 1H), 5.18 (dd,  $J = 10.6$  Hz, 1.5 Hz, 1H), 4.60 (d,  $J = 4.9$  Hz, 2H);  $^{13}\text{C}$  NMR (101 MHz,  $\text{CDCl}_3$ )  $\delta$  165.17, 154.79, 138.97, 138.39, 132.59, 132.20, 131.87, 131.62, 131.54, 131.20, 130.52, 128.90, 128.74, 128.70, 126.96, 124.92, 124.33, 121.99, 121.87, 121.83, 121.80, 121.76, 121.72, 121.61, 117.99, 114.08, 69.73; HRMS calcd for  $\text{C}_{24}\text{H}_{17}\text{F}_6\text{N}_4\text{O}$  491.1307 [ $\text{M}+\text{H}^+$ ], found 491.1295.

**9-(3,5-bis(trifluoromethyl)phenyl)-2-phenyl-3a,4-dihydro-3H-benzo[b]pyrazolo**

**[1,5-d][1,4]oxazine (Pyr-12):** The compound **Tet-12** (110mg, 0.22mmol) was irradiated with a hand-held 310nm UV lamp in ethyl acetate. The mixture was stirred in a quartz botter and the extent of the reaction was monitored by TLC. After about 2 hours, the mixture was concentrated and purified by silica gel flash chromatography using ethyl acetate/ Petroleum ether as eluent to give the title product as a light yellow solid (65mg, 64%):  $^1\text{H}$  NMR (400 MHz,  $\text{CDCl}_3$ )  $\delta$  8.04 (s, 2H), 7.81 (s, 2H), 7.30–7.24 (br, 2H), 7.09–7.01 (m, 2H), 6.92 (d,  $J = 7.2$  Hz, 1H), 4.08 (d,  $J = 8.2$  Hz, 2H), 3.42 (t,  $J = 11.7$  Hz, 1H), 3.26 (q,  $J = 8.4$  Hz, 1H), 2.87 (d,  $J = 17.4$  Hz, 1H);  $^{13}\text{C}$  NMR (101 MHz,  $\text{CDCl}_3$ )  $\delta$  149.54, 146.66, 143.23, 133.59, 131.73, 131.21, 130.88, 130.55, 130.23, 129.96, 129.28, 128.96, 128.48, 127.78, 125.89, 125.07, 123.67, 123.60, 122.36, 120.34, 120.30, 120.27, 119.65, 117.96, 64.67, 56.84, 35.43; HRMS calcd for  $\text{C}_{24}\text{H}_{17}\text{F}_6\text{N}_2\text{O}$  463.1245 [ $\text{M}+\text{H}^+$ ], found 463.1228.

### Scheme S3

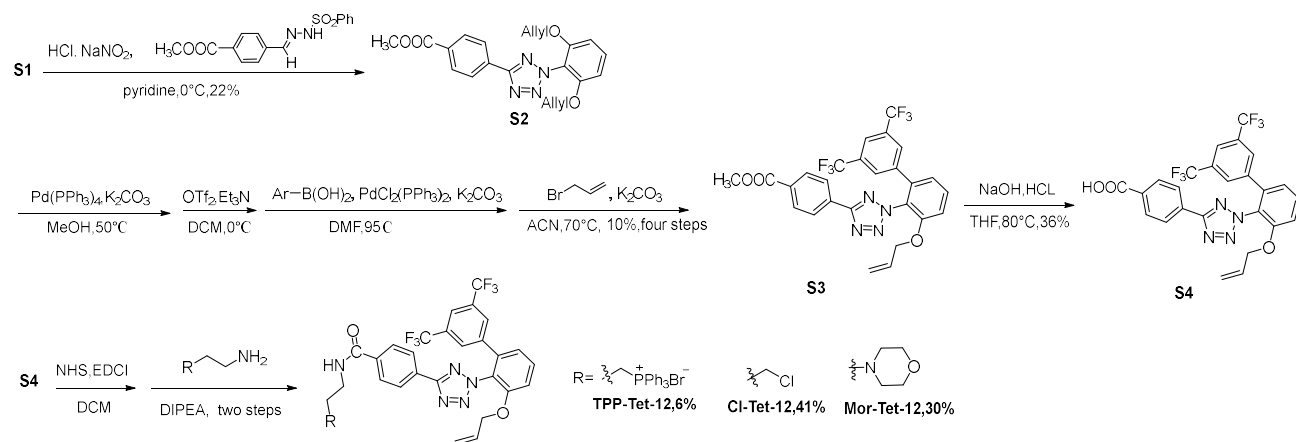

**Methyl 4-(2-(2,6-diallyloxyphenyl)-2H-tetrazole-5-yl)benzoate (S2):** Compound **S2** was synthesized as a yellow solid with 22% yield using the same synthetic procedure as **Tet-4** using 2,6-(diallyloxy)aniline and methyl (*E*)-4-((2-(phenylsulfonyl)hydrazono)methyl)benzoate as material:  $^1\text{H}$  NMR (400 MHz,  $\text{CDCl}_3$ ),  $\delta$  8.34 (d,  $J = 8.8$  Hz, 2H), 8.18 (d,  $J = 8.8$  Hz, 2H), 7.44 (t,  $J = 8.0$  Hz, 1H), 6.70 (d,  $J = 8.5$  Hz, 2H), 5.90–5.80 (m, 2H), 5.23–5.14 (m, 4H), 4.55 (dt,  $J = 5.0$  Hz, 1.8 Hz, 4H), 3.96 (s, 3H);  $^{13}\text{C}$  NMR (101 MHz,  $\text{CDCl}_3$ )  $\delta$  166.64, 164.03, 155.40, 132.45, 131.99, 131.76, 131.52, 130.16, 126.96, 117.74, 116.09, 105.70, 69.58, 52.30, 0.00; HRMS calcd for  $\text{C}_{21}\text{H}_{20}\text{N}_4\text{O}_4\text{Na}$  415.1382 [ $\text{M}+\text{Na}^+$ ], found 415.1379.

**4-(2-(3-(allyloxy)-3',5'-bis(trifluoromethyl)-[1,1'-biphenyl]-2-yl)-2H-tetrazol-5-yl)benzoic acid (S4):** Compound **S3** was synthesized as a yellow solid with 10% yield using the same synthetic procedure as compound **Tet-4**. To a solution of compound **S3** (70 mg, 0.13 mmol) in 20 mL tetrahydrofuran was added 30 mL NaOH aqueous solution (2 mol/L). The mixture was stirred at 80 °C for 8 hours. After about 8 hours, the reaction mixture was washed with concentrated HCl (35 ml) and extracted with ethyl acetate (50 ml  $\times$  3) and water. The organic phase was dried over anhydrous  $\text{Na}_2\text{SO}_4$  and purified by silica gel flash chromatography using ethyl acetate/ Petroleum ether as eluent to give the title compound (30 mg, 36%) as orange solid:  $^1\text{H}$  NMR (400 MHz,  $\text{CDCl}_3$ )  $\delta$  8.25 (s, 4H), 7.74 (s, 1H), 7.70–7.66 (m, 3H), 7.23 (d,  $J = 8.6$  Hz, 1H), 7.19 (d,  $J = 7.7$  Hz, 1H), 5.93–5.84 (m, 1H), 5.25 (dd,  $J = 16.2$  Hz, 1.4 Hz, 1H), 5.22 (dd,  $J = 9.3$  Hz, 1.44 Hz, 1H), 4.64 (d,  $J = 4.9$  Hz, 2H);  $^{13}\text{C}$  NMR (101 MHz,  $\text{CDCl}_3$ )  $\delta$  171.40, 164.16, 154.72, 138.76, 138.42, 132.72, 132.25, 131.92, 131.77, 131.58, 131.25, 131.03, 130.83, 128.68, 127.00, 124.76, 124.24, 122.03, 121.85, 121.53, 118.18, 114.07, 69.82; HRMS calcd for  $\text{C}_{25}\text{H}_{17}\text{F}_6\text{N}_4\text{O}_3$  535.1205 [ $\text{M}+\text{H}^+$ ], found 535.1191.

**4-(2-(3-(allyloxy)-3',5'-bis(trifluoromethyl)-[1,1'-biphenyl]-2-yl)-2H-tetrazol-5-yl)-N-(2-morpholinopropyl)benzamide (Mor-Tet-12):** Preparation of

1-(4-(2-(3-(allyloxy)-3',5'-bis(trifluoromethyl)-[1,1'-biphenyl]-2-yl)-2H-tetrazol-5-yl)benzoyl)-1H-pyrrole-2,5-dione: To a solution of aboved benzoic acid (170 mg, 0.32 mmol) in DCM was added NHS (368 mg, 3.2 mmol) and EDCI (246 mg, 1.28 mmol). The reaction was stirred for 5 hours. After about 5 hours, the mixture was extracted with ethyl acetate (60 ml × 3) and water to obtain the brown oil as the crude product. The crude product was used in the next step.

Preparation of 4-(2-(3-(allyloxy)-3',5'-bis(trifluoromethyl)-[1,1'-biphenyl]-2-yl)-2H-tetrazol-5-yl)-N-(3-morpholinopropyl)benzamide: To a solution of aboved crude product in DCM was added DIPEA (262 μL, 1.6 mmol) and N-(3-aminoethyl) morpholine (166 mg, 1.28 mmol). The mixture was stirred for 3 hours. After about 3 hours, the mixture was extracted with ethyl acetate (60ml × 3) and water and purified by silica gel flash chromatography using ethyl acetate/ Petroleum ether as eluent to give the title product (60 mg, 30%) as a light yellow solid: <sup>1</sup>H NMR (400 MHz, CDCl<sub>3</sub>) δ 8.20 (d, *J* = 8.4 Hz, 2H), 7.90 (d, *J* = 8.4 Hz, 2H), 7.68 (t, *J* = 8.1 Hz, 1H), 7.67 (s, 2H), 7.23 (d, *J* = 8.6 Hz, 1H), 7.19 (d, *J* = 7.8 Hz, 1H), 6.88 (s, 1H), 5.93–5.83 (m, 1H), 5.25 (dd, *J* = 17 Hz, 1.5 Hz, 1H), 5.21 (dd, 10.5 Hz, 1.4 Hz, 1H), 4.65 (d, *J* = 5.0 Hz, 2H), 3.75 (t, *J* = 4.6 Hz, 4H), 3.60 (q, *J* = 5.9 Hz, 2H), 2.64 (t, *J* = 6.0 Hz, 2H), 2.53 (s, 4H). <sup>13</sup>C NMR(101 MHz, CDCl<sub>3</sub>) δ 166.69, 164.28, 154.71, 138.79, 138.39, 136.30, 132.68, 132.21, 131.88, 131.58, 131.21, 129.66, 128.63, 127.56, 127.12, 124.78, 124.24, 122.01, 121.84, 121.53, 118.12, 114.06, 69.79, 66.94, 56.92, 53.35, 36.14; HRMS calcd for C<sub>31</sub>H<sub>29</sub>F<sub>6</sub>N<sub>6</sub>O<sub>3</sub> 647.2205 [M+H<sup>+</sup>], found 647.2191.

**4-(2-(3-(allyloxy)-3',5'-bis(trifluoromethyl)-[1,1'-biphenyl]-2-yl)-2H-tetrazol-5-yl)-N-(3-chloropropyl)benzamide (Cl-Tet-12):**

Compound **Cl-Tet-12** was synthesized as a yellow solid with 41% yield using the same synthetic procedure as compound **Mor-Tet-12**: <sup>1</sup>H NMR (400MHz, CDCl<sub>3</sub>) δ 8.18 (d, *J*=8.6 Hz, 2H), 7.90 (d, *J* = 8.7 Hz, 2H), 7.73 (s, 1H), 7.68 (t, *J* = 7.8 Hz, 1H), 7.66 (s, 2H), 7.23 (dd, *J* = 8.6 Hz, 1.2Hz, 1H), 7.19 (dd, *J* = 7.8 Hz, 1.2 Hz, 1H), 6.56 (t, *J* = 3.9 Hz, 1H), 5.24 (dd, *J* = 17.1 Hz, 1.38Hz, 1H), 5.21 (dd, *J* = 10.6 Hz, 1.44 Hz, 1H), 4.65 (dt, *J* = 5.0 Hz, 1.7 Hz, 2H), 3.67–3.63 (m, 4H), 2.17–2.11 (m, 2H), <sup>13</sup>C NMR (101 MHz, CDCl<sub>3</sub>) δ <sup>13</sup>C NMR (101 MHz, CDCl<sub>3</sub>) δ 167.04, 164.23, 154.70, 138.78, 138.39, 136.09, 132.69, 132.21, 131.88, 131.58, 131.21, 129.78, 128.64, 127.54, 127.14, 124.76, 124.24, 122.01, 121.84, 121.80, 121.52, 118.14, 114.07, 69.80, 42.67, 37.78, 32.00; HRMS calcd for C<sub>25</sub>H<sub>17</sub>F<sub>6</sub>N<sub>4</sub>O<sub>3</sub> 610.1444 [M+H<sup>+</sup>], found 647.2191.

**(3-(4-(2-(3-(allyloxy)-3',5'-bis(trifluoromethyl)-[1,1'-biphenyl]-2-yl)-2H-tetrazol-5-yl)benzamido)propyl)triphenylphosphonium bromide (TPP-Tet-12):**

Compound **TPP-Tet-12** was synthesized as a yellow solid with 6% yield using the same synthetic procedure as compound **Mor-Tet-12**: <sup>1</sup>H NMR (400 MHz, d<sub>6</sub>-DMSO) δ 9.89 (s, 1H), 8.05 (s, 3H), 9.98 (s, 1H), 7.86–7.73 (m, 16H), 7.55 (d, *J* = 8.0 Hz, 1H), 7.49 (s, 1H), 7.43 (d, *J* = 8 Hz, 1H), 7.36 (s, 1H), 7.23 (s, 1H), 5.90–5.81 (m, 1H), 5.14 (d, *J* = 8 Hz, 1H), 5.11 (s, 1H), 4.72 (d, *J* = 8 Hz, 2H), 1.95 (s, 2H). <sup>13</sup>C NMR (101 MHz, d<sub>6</sub>-DMSO) δ 166.03, 164.19, 154.21, 139.05, 137.40, 136.63, 135.41, 134.06, 133.96, 132.90, 131.03, 130.78, 130.66, 129.19, 128.92, 128.81, 126.65, 124.61, 123.90, 122.82, 122.35, 121.90, 119.25, 118.40, 117.74, 115.52, 69.57, 22.52, 19.23, 18.71. HRMS calcd for C<sub>46</sub>H<sub>37</sub>F<sub>6</sub>N<sub>5</sub>O<sub>2</sub>P 836.2589 [M-Br<sup>-</sup>], found 836.2581.



Scheme S4

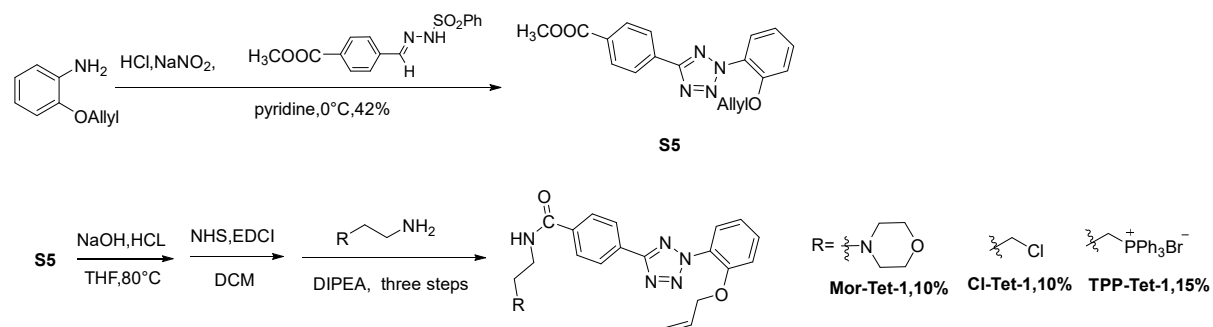

**Methyl 4-(2-(2-(allyloxy)phenyl)-2H-tetrazol-5-yl)benzoate(S5):**

Compound **S5** was synthesized as a yellow solid with 42% yield using the same synthetic procedure as compound **Tet-4** using 2-(allyloxy)aniline and methyl (*E*)-4-((2-(phenylsulfonyl)hydrazono)methyl)benzoate as material:  $^1\text{H}$  NMR (400 MHz,  $\text{CDCl}_3$ )  $\delta$  8.33 (d,  $J = 8.0$  Hz, 2H), 8.19 (d,  $J = 8.0$  Hz, 2H), 7.63 (dd,  $J = 8.04$  Hz, 2 Hz, 1H) 7.52 (m, 1H), 7.14 (m, 2H), 6.00–5.90 (m, 1H), 5.35 (m, 1H), 5.23 (m, 1H), 4.64 (dt,  $J = 4.9$  Hz, 1.7 Hz, 2H), 3.36 (s, 3H);  $^{13}\text{C}$  NMR (101 MHz,  $\text{CDCl}_3$ )  $\delta$  166.55, 164.01, 152.52, 132.02, 131.69, 131.50, 130.21, 126.93, 126.67, 121.01, 117.83, 114.34, 69.74, 52.30; HRMS calcd for  $\text{C}_{18}\text{H}_{17}\text{N}_4\text{O}_3$  337.1301 [ $\text{M}+\text{H}^+$ ], found 337.1295.

**4-(2-(2-(allyloxy)phenyl)-2H-tetrazol-5-yl)-N-(2morpholinoethyl)benzamide(Mor-Tet-1):**

Preparation of 4-(2-(2-(allyloxy)phenyl)-2H-tetrazol-5-yl)benzoic acid: to a solution of compound **S5** (400 mg, 1.24 mmol) in 30 mL THF was added 30 mL NaOH aqueous solution (2 mol/L). The mixture was stirred at 80 °C for 8 hours. After about 8 hours, the reaction mixture was washed with concentrated HCl (35 ml) and extracted with ethyl acetate (50 ml  $\times$  3) and water. The organic phase was dried over anhydrous  $\text{Na}_2\text{SO}_4$  and to obtain the crude product as yellow oil. The crude product was used in the next step.

Preparation of 1-(4-(2-(2-(allyloxy)phenyl)-2H-tetrazol-5-yl)benzoyl)-1H-pyrrole-2,5-dione: to a solution of aboved crude product (1.24 mmol) in DCM was added NHS (1.42 g, 12.4 mmol) and EDCI (957 mg, 5 mmol). The reaction was stirred for 5 hours. After about 5 hours, the mixture was extracted with ethyl acetate (60 ml  $\times$  3) and water to obtain the brown oil as the crude product. The crude product was used in the next step.

Preparation of 4-(2-(2-(allyloxy)phenyl)-2H-tetrazol-5-yl)-N-(2morpholinoethyl)benzamide: to a solution of aboved crude product (1.24 mmol) in DCM was added DIPEA (1.12 mL, 6.2 mmol) and N-(3-aminoethyl) morpholine (650 mg, 5 mmol). The mixture was stirred for 3 hours. After about 3 hours, the mixture was extracted with ethyl acetate (60 ml  $\times$  3) and water and purified by silica gel flash chromatography using ethyl acetate/ Petroleum ether as

Eluent to give the title product (65 mg, 10%) as a white solid:  $^1\text{H}$  NMR (400 MHz,  $\text{CDCl}_3$ )  $\delta$  8.32 (d,  $J = 8.4$  Hz, 2H), 7.93 (d,  $J = 8.4$  Hz, 2H), 7.62 (d,  $J = 8.1$  Hz, 1H), 7.53 (t,  $J = 8.2$  Hz, 1H), 7.14 (t,  $J = 8.2$  Hz, 2H), 6.95 (s, 1H), 6.00–5.90 (m, 1H), 5.35 (d,  $J = 17.3$  Hz, 1H), 5.22 (d,  $J = 10.6$  Hz, 1H), 4.64 (d,  $J = 5.0$  Hz, 2H), 3.75 (t,  $J = 4.8$  Hz, 4H), 3.60 (q,  $J = 5.8$  Hz, 2H), 2.64 (t,  $J = 6.1$  Hz, 2H), 2.54 (s, 4H);  $^{13}\text{C}$  NMR (101 MHz,  $\text{CDCl}_3$ )  $\delta$  166.76, 164.02, 152.50, 136.14, 132.02, 130.17, 127.61, 127.15, 126.91, 126.67, 121.01, 117.81, 114.35, 69.73, 66.93, 56.94, 54.72, 36.17; HRMS calcd for  $\text{C}_{23}\text{H}_{27}\text{N}_6\text{O}_3$  435.2145 [ $\text{M}+\text{H}^+$ ], found 435.2135.

**4-(2-(2-(allyloxy)phenyl)-2H-tetrazol-5-yl)-N-(3chlorinepropyl)benzamide(CI-Tet-1):**

Compound **CI-Tet-1** was synthesized as a light yellow solid with 10% yield using the same synthetic procedure as compound **Mor-Tet-1**:  $^1\text{H}$  NMR (400 MHz,  $\text{CDCl}_3$ )  $\delta$  8.31 (d,  $J = 8.6$  Hz, 2H), 7.92 (d,  $J = 8.8$  Hz, 2H), 7.62 (dd,  $J = 8.0$  Hz, 1.8 Hz, 1H), 7.55–7.51 (m, 1H), 7.16–7.12 (m, 2H), 6.61 (s, 1H), 6.00–5.90 (m, 1H), 5.35 (m, 1H), 5.23 (m, 1H), 4.64 (dt,  $J = 4.9$  Hz, 1.6 Hz, 2H), 3.69–3.64 (m, 4H), 2.18–2.12 (m, 2H);  $^{13}\text{C}$  NMR (101 MHz,  $\text{CDCl}_3$ )  $\delta$  167.12, 163.98, 152.50, 135.92, 132.04, 132.01, 130.29, 127.58, 127.19, 126.93, 126.63, 121.03, 117.85, 114.32, 77.25, 69.74, 42.72, 37.80, 32.01; HRMS calcd for  $\text{C}_{20}\text{H}_{20}\text{ClN}_5\text{O}_2\text{Na}$  420.1203 [ $\text{M}+\text{Na}^+$ ], found 420.1195.

**(3-(4-(2-(2-(allyloxy)phenyl)-2H-tetrazol-5-yl)benzamido)propyl)triphenylphosphonium Bromide (TPP-Tet-1):**

compound **TPP-Tet-1** was synthesized as a green solid with 15% yield using the same synthetic procedure as compound **Mor-Tet-1**. the data was identical as previous reported<sup>[4]</sup>.

**Reference:**

[S1] W. H. Melhuish, *J. Phys. Chem.* **1961**, *65*, 229.

[S2] H. Meier, H. Heimgartner, *Helvetica Chimica Acta.* **1985**, *68*, 1283.

[S3] S. O. Rashid, S. S. Almadhi, D. J. Berrisford, J. Raftery, I. Vitorica-Yrezabal, G. Whitehead, P. Quayle, *Tetrahedron.* **2019**, *75*, 2413.

[S4] S. Liu, H. Su, L. Bu, J. Yan, G. Li, J. Huang, *Analyst*, **2021**, *146*, 1369.

# <sup>1</sup>H and <sup>13</sup>C NMR Spectra

Nov11-2020-anpeng\_10.fid  
 YUNNAN UNIVERSITY ASCEND AVIIIIHD600  
 PROTON CDCl3 [D:anpeng] anpeng 7

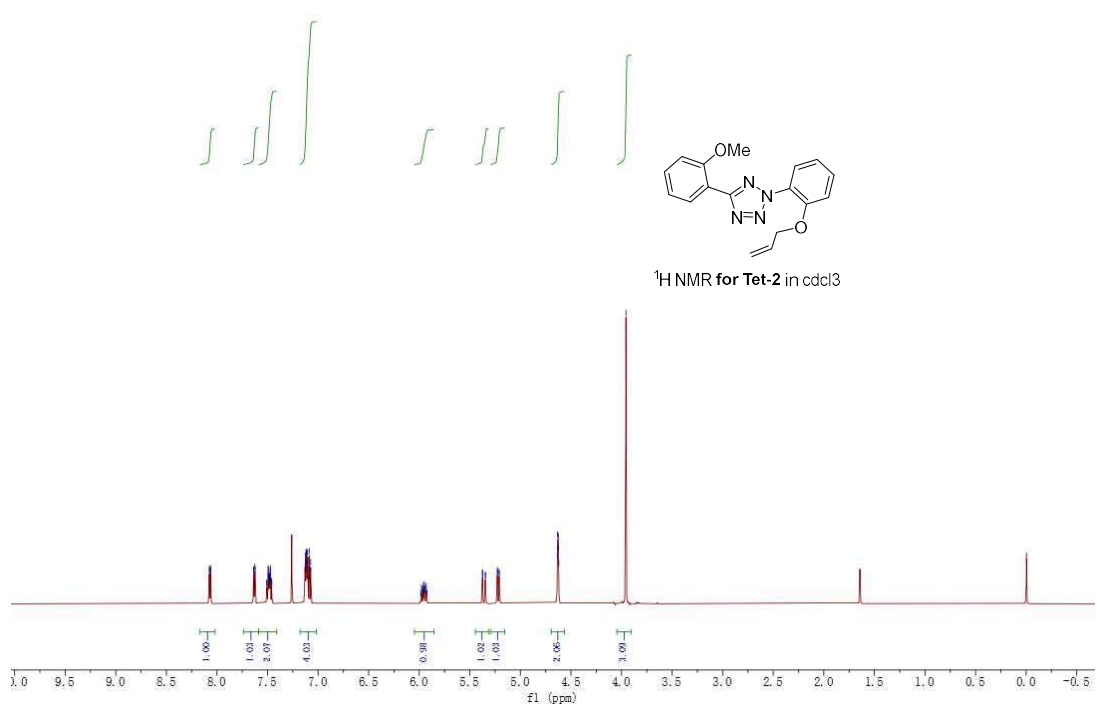

Nov25-2020-anpeng\_41.fid  
 YUNNAN UNIVERSITY ASCEND AVIIIIHD600  
 C13CPD CDCl3 [D:anpeng] anpeng 7

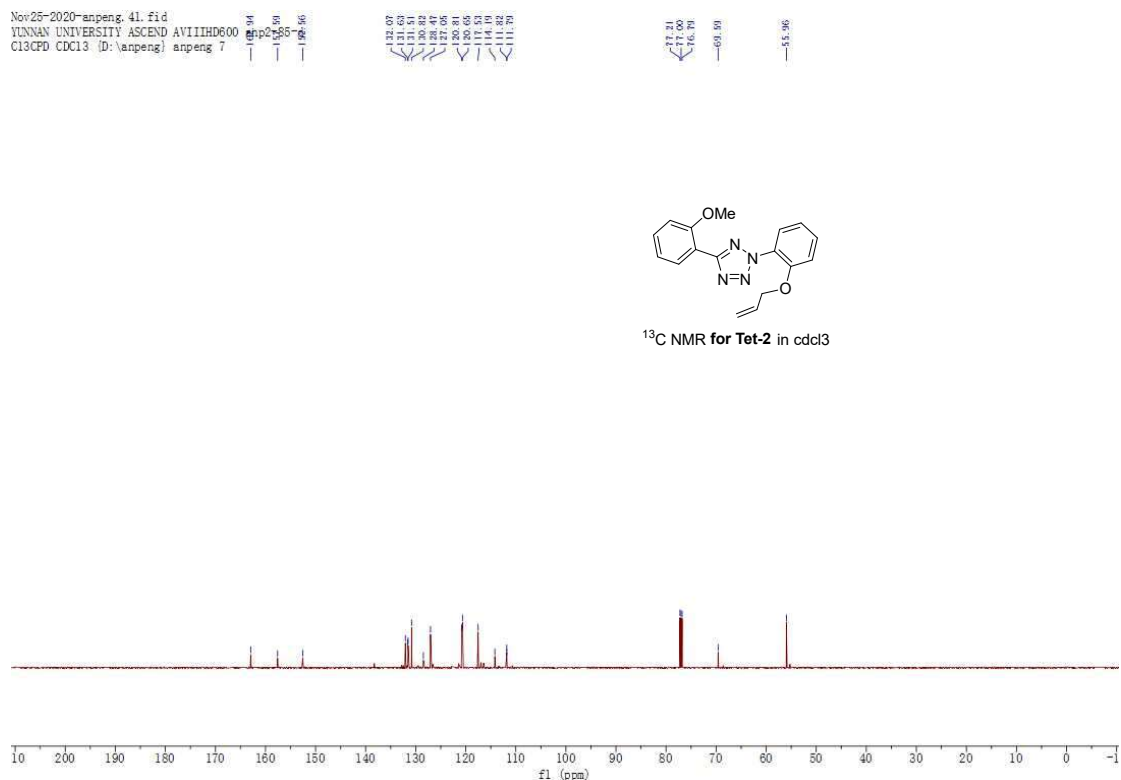

Nov25-2020-anpeng.50.fid  
 YUNNAN UNIVERSITY ASCEND AVIIIH600-anpeng-86-d  
 PROTON CDCl3 [D:\anpeng] anpeng 8

7.81  
7.80  
7.77  
7.75  
7.55  
7.55  
7.27  
7.25  
7.25  
7.24  
7.06  
6.96  
6.95  
6.95  
6.94  
6.93  
6.92  
6.91  
6.90  
6.90  
6.86  
6.86  
6.85  
6.85  
6.84  
6.84  
6.82  
4.05  
4.05  
4.04  
3.75  
3.68  
3.66  
3.64  
3.62  
3.50  
3.38  
3.14  
3.11  
3.10

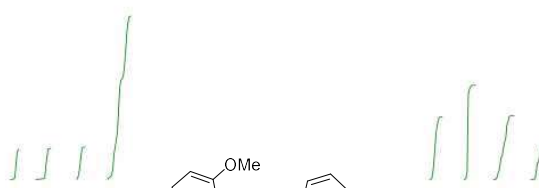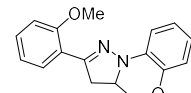

<sup>1</sup>H NMR for Pyr-2 in cdcl3

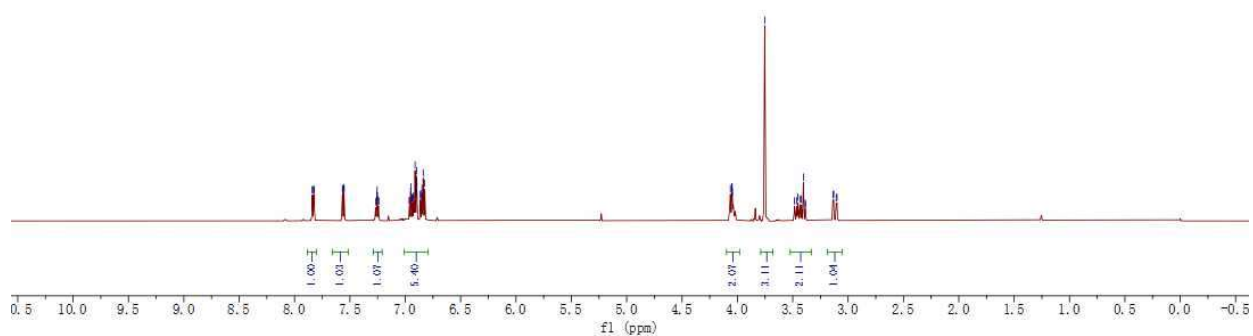

Nov25-2020-anpeng.51.fid  
 YUNNAN UNIVERSITY ASCEND AVIIIH600-anpeng-86-d  
 C13CPD CDCl3 [D:\anpeng] anpeng 8

157.80  
157.06  
149.43  
144.74  
131.90  
128.82  
128.82  
121.61  
121.61  
120.62  
116.37  
111.24

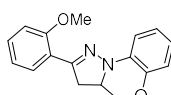

<sup>13</sup>C NMR for Pyr-2 in cdcl3

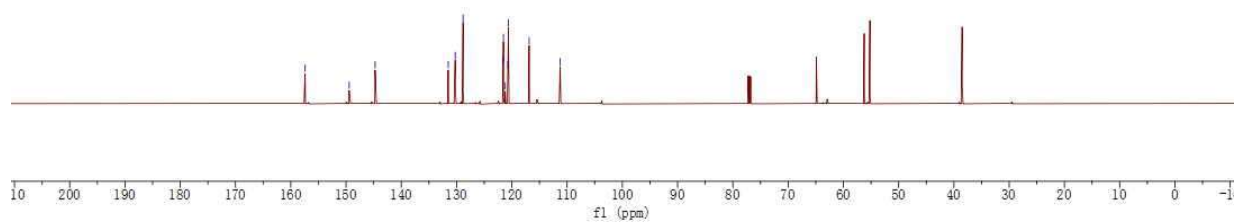

Dec16-2020-anpeng.20.f1d  
 YUNNAN UNIVERSITY ASCEND AVI11HD6000-anpeng-20-2  
 PROTON CDC13 (D:\anpeng) anpeng 13

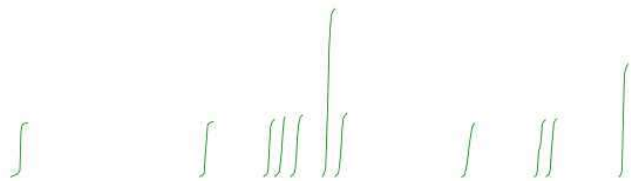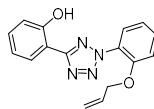

<sup>1</sup>H NMR for Tet-3 in cdcl3

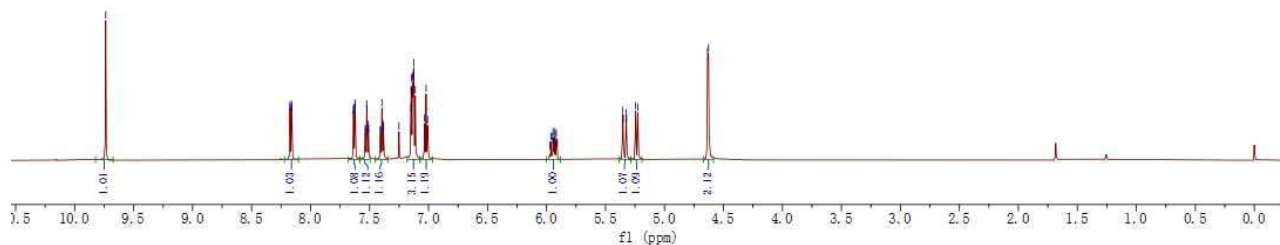

Dec16-2020-anpeng.21.fid  
 YUNNAN UNIVERSITY ASCEND AVI11HD6000-anpeng-21-2  
 C13CPD CDC13 (D:\anpeng) anpeng 13

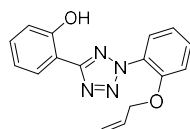

<sup>13</sup>C NMR for Tet-3 in cdcl3

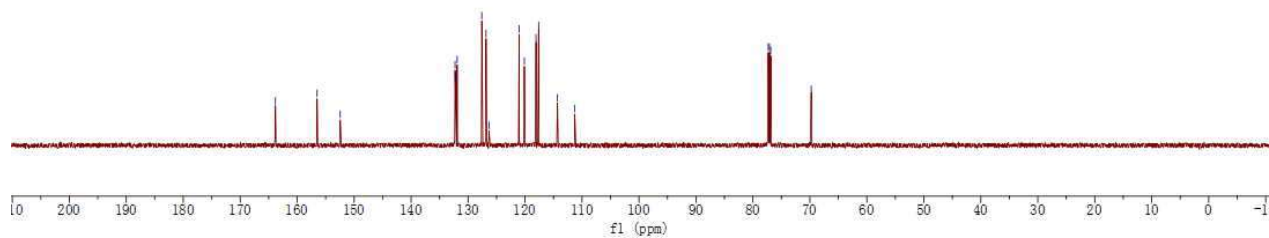

7.41  
7.40  
7.40  
7.38  
7.38  
7.31  
7.31  
7.30  
7.29  
7.28  
7.28  
7.27  
7.27  
7.20  
7.20  
7.05  
7.04  
7.04  
7.03  
7.03  
7.03  
7.02  
7.02  
6.97  
6.97  
6.96  
6.94  
6.94  
6.93  
6.92  
6.92  
4.21  
4.21  
4.20  
4.19  
4.19  
4.19  
4.18  
4.18  
3.58  
3.58  
3.55  
3.55  
3.53  
3.53  
3.48  
3.48  
3.44  
3.44  
3.15  
3.15  
3.12  
3.12  
3.11

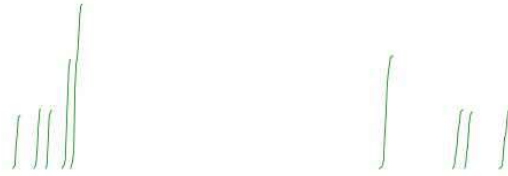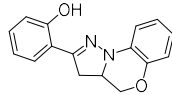

<sup>1</sup>H NMR for Pyr-3 in cdcl3

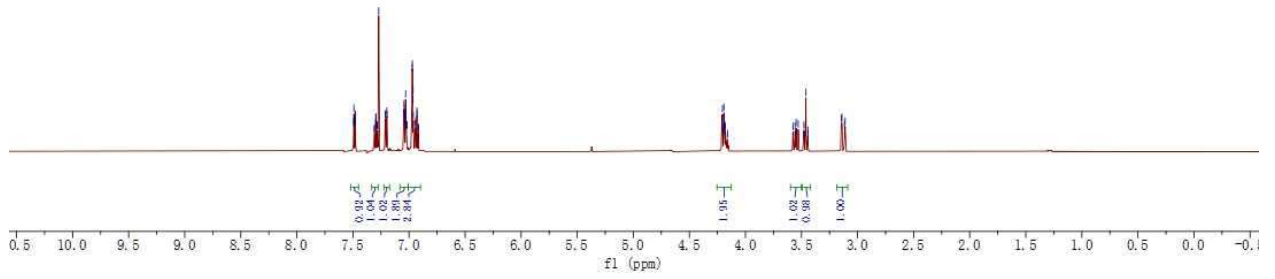

Nov26-2020-anpeng. 31. fid  
YUNNAN UNIVERSITY ASCEND AVIIHHD600  
C13CPD CDCl3 [D:\anpeng] anpeng 6

130.70  
127.47  
127.38  
126.81  
120.79  
117.26  
116.65  
115.73  
77.01  
77.00  
76.79  
64.70  
54.80  
35.91

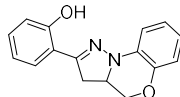

<sup>13</sup>C NMR for Pyr-3 in cdcl3

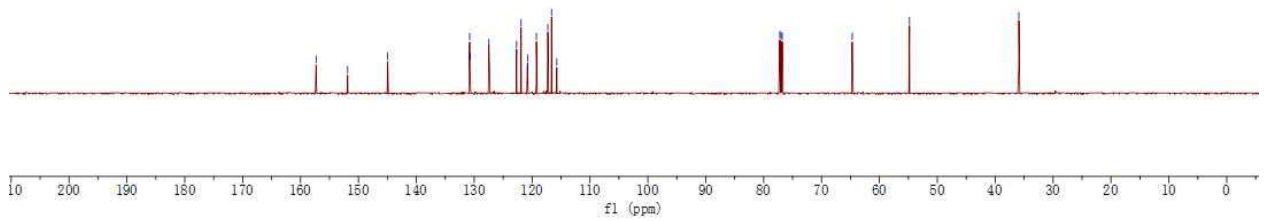

AK332M. 10. fid  
AK332M

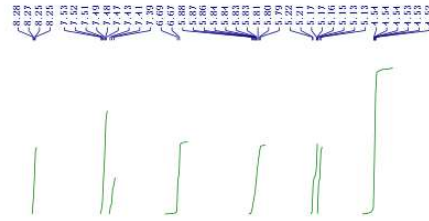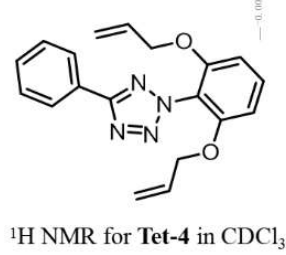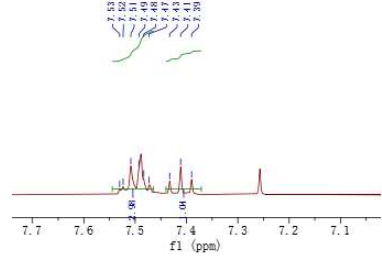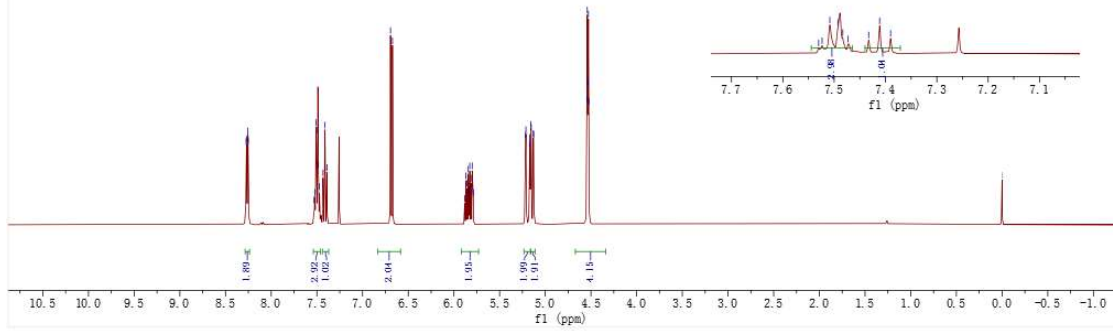

AK332-C. 10. fid  
AK332-C

164.84  
158.47  
132.31  
130.22  
128.87  
127.04  
117.65  
103.73  
69.08

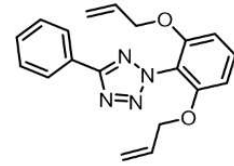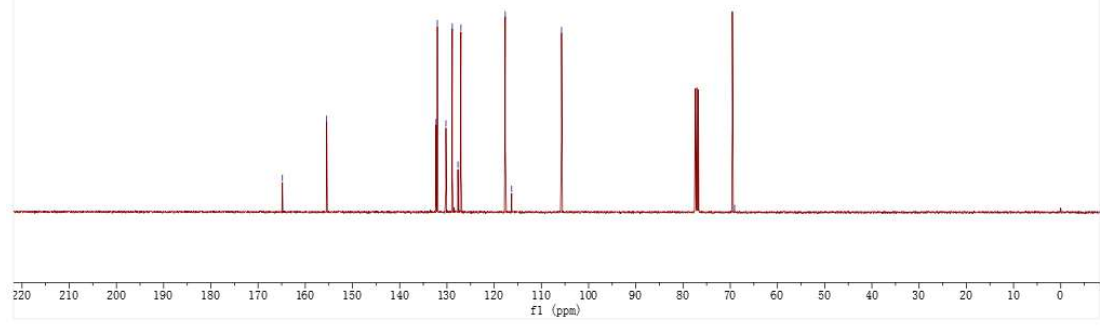

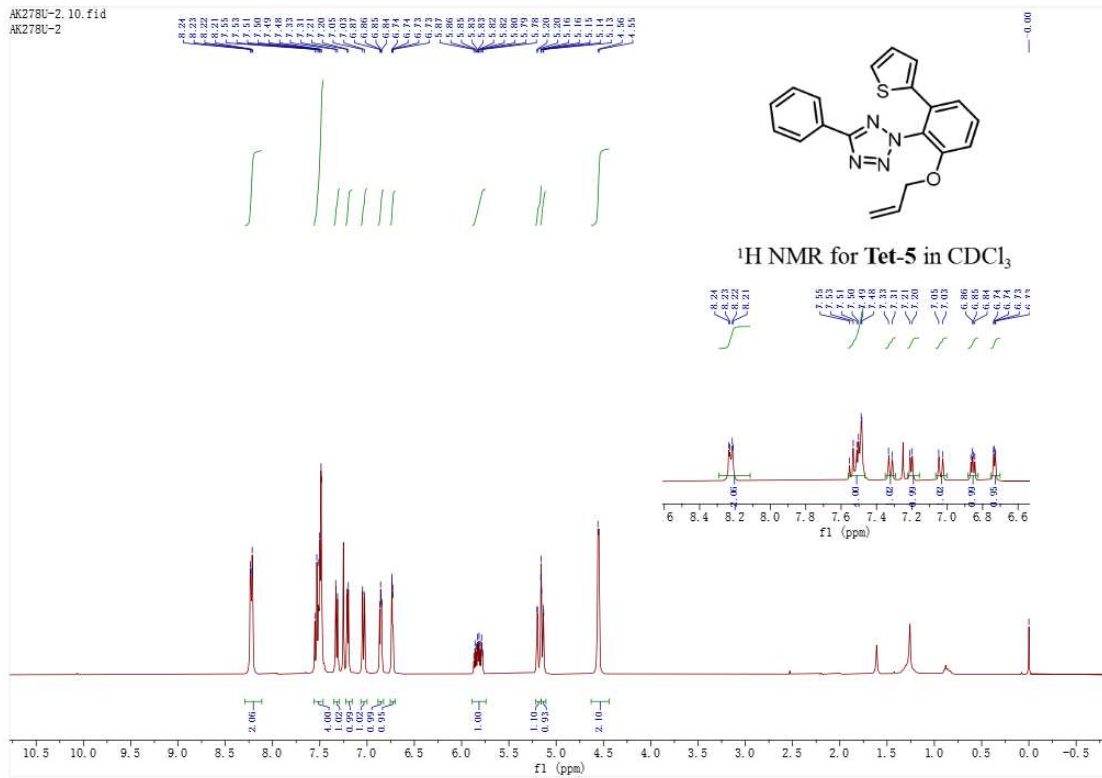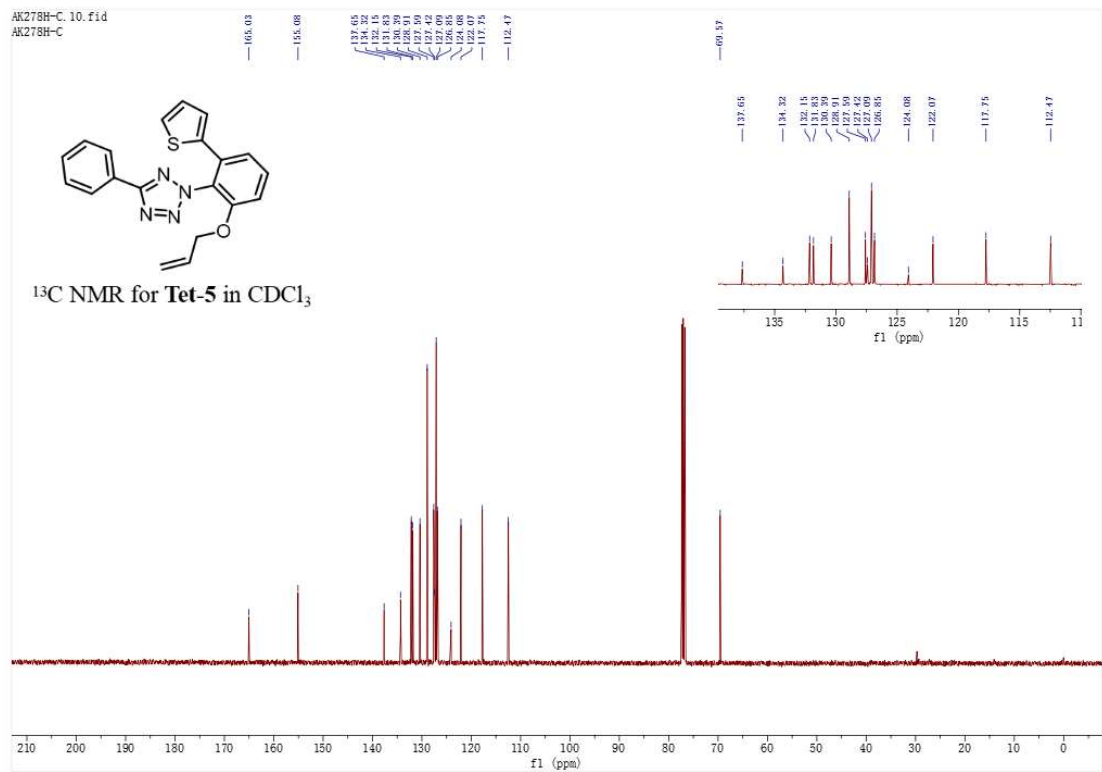



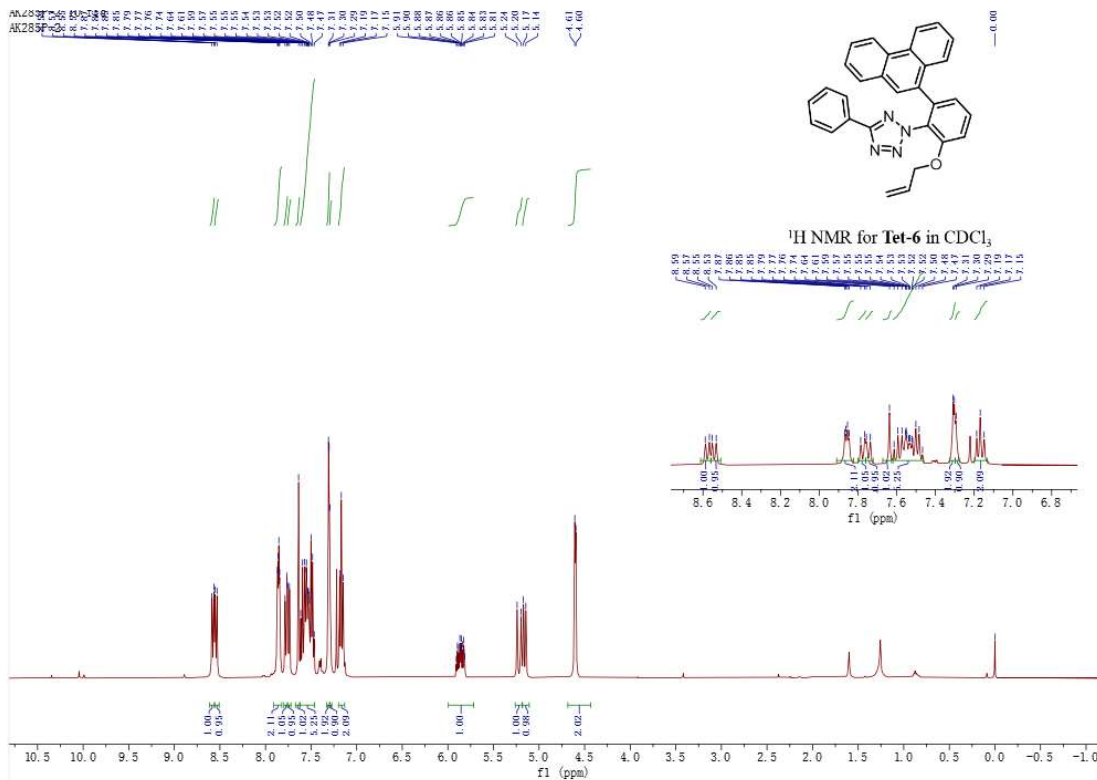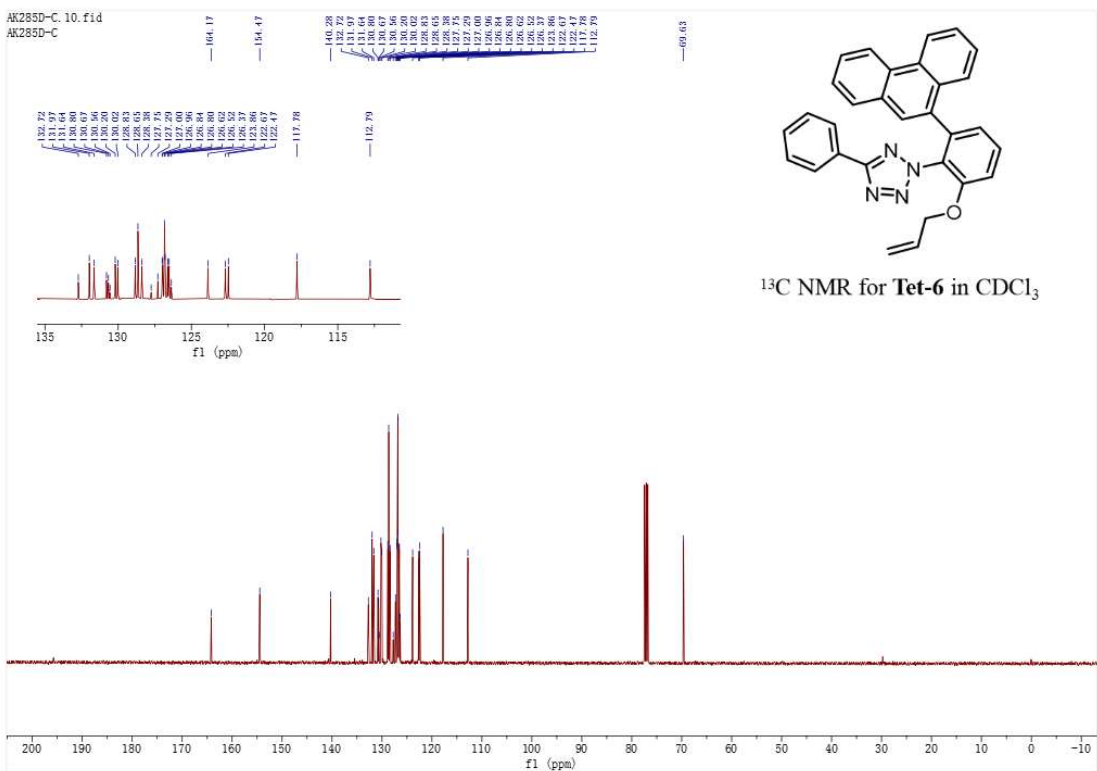

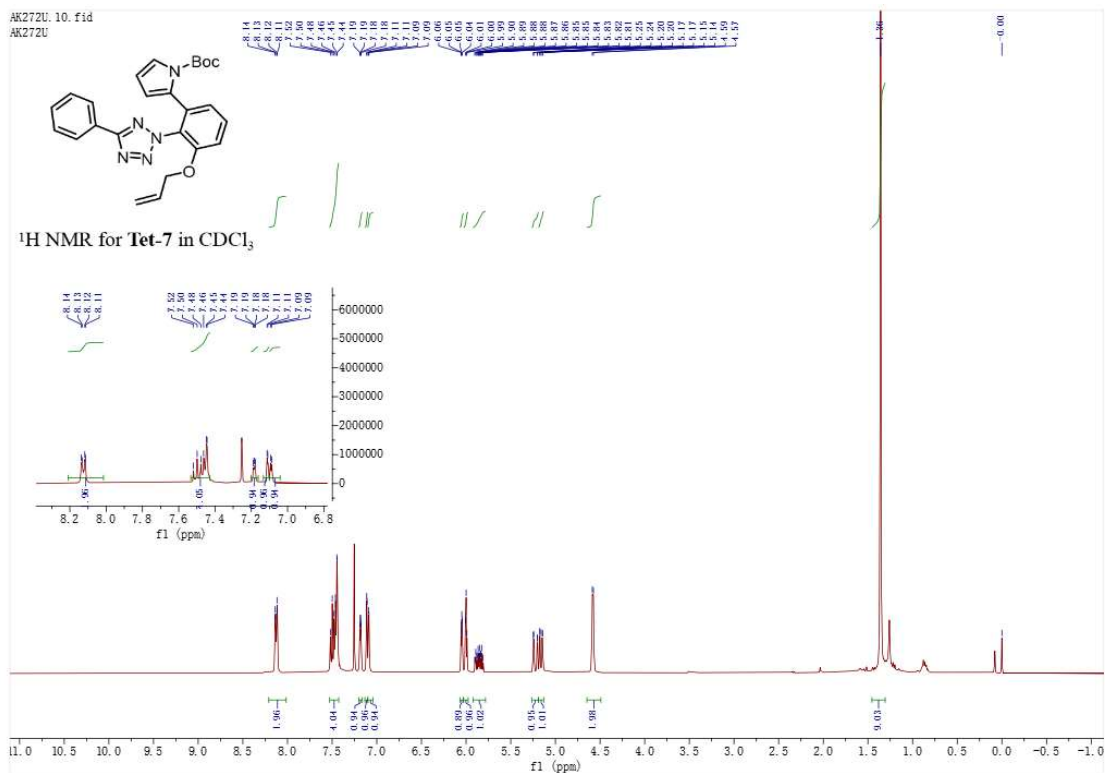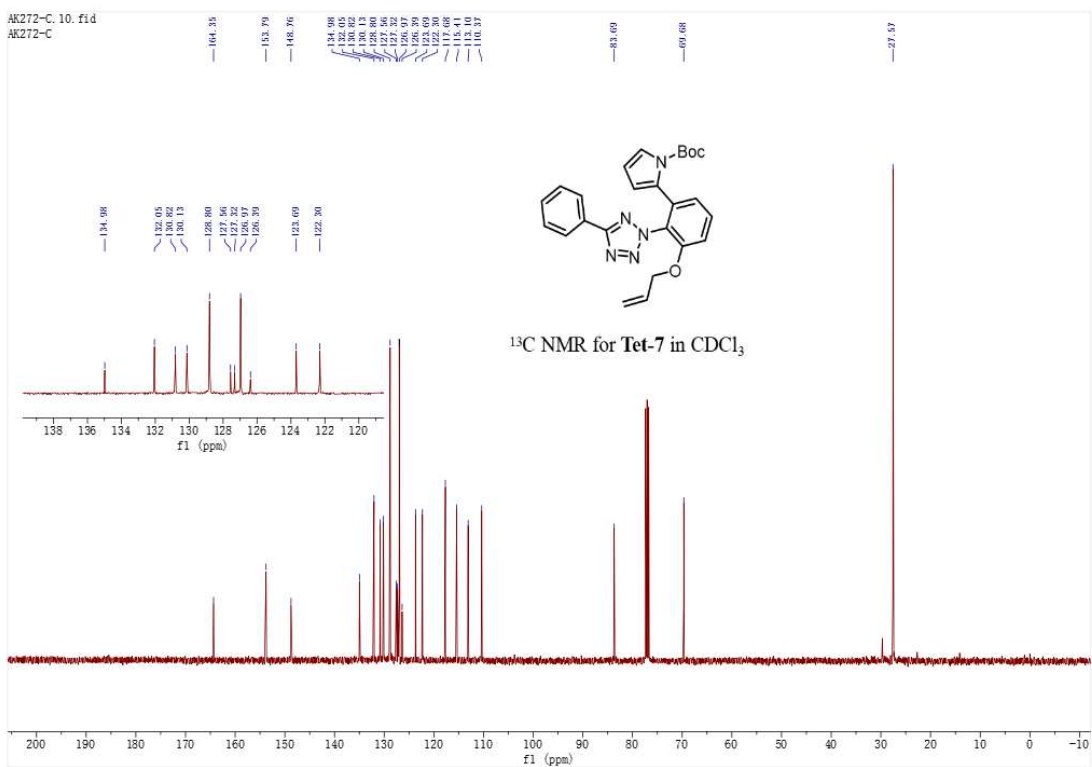

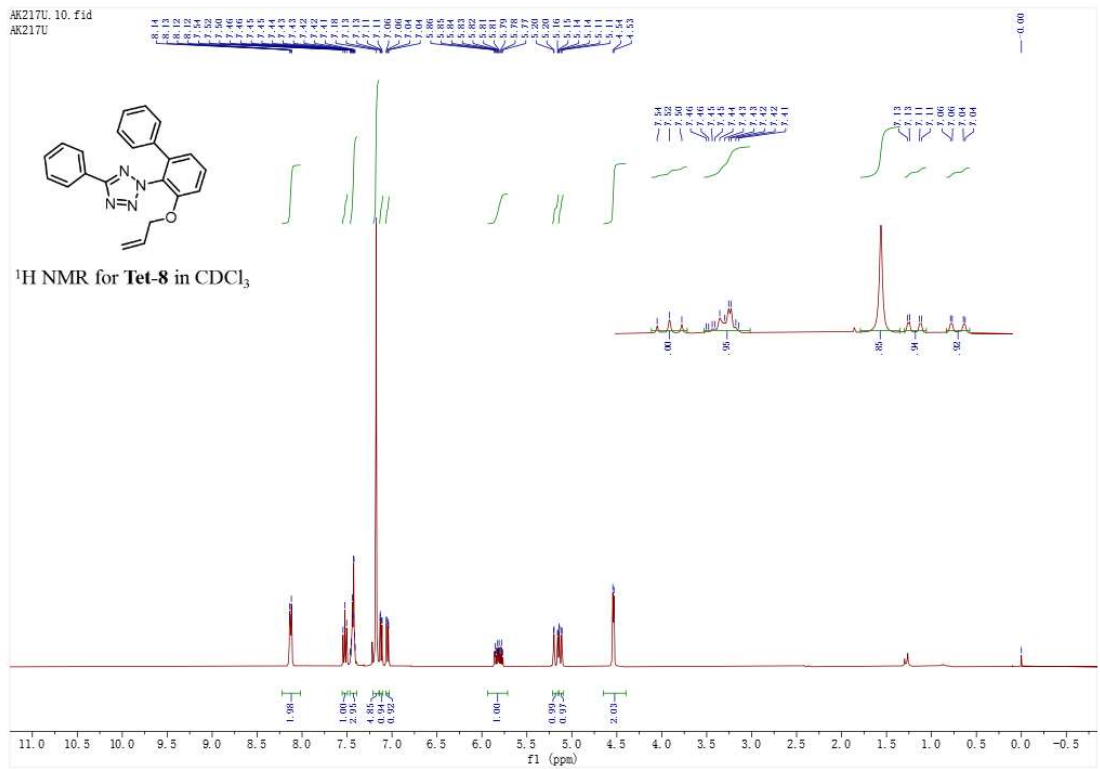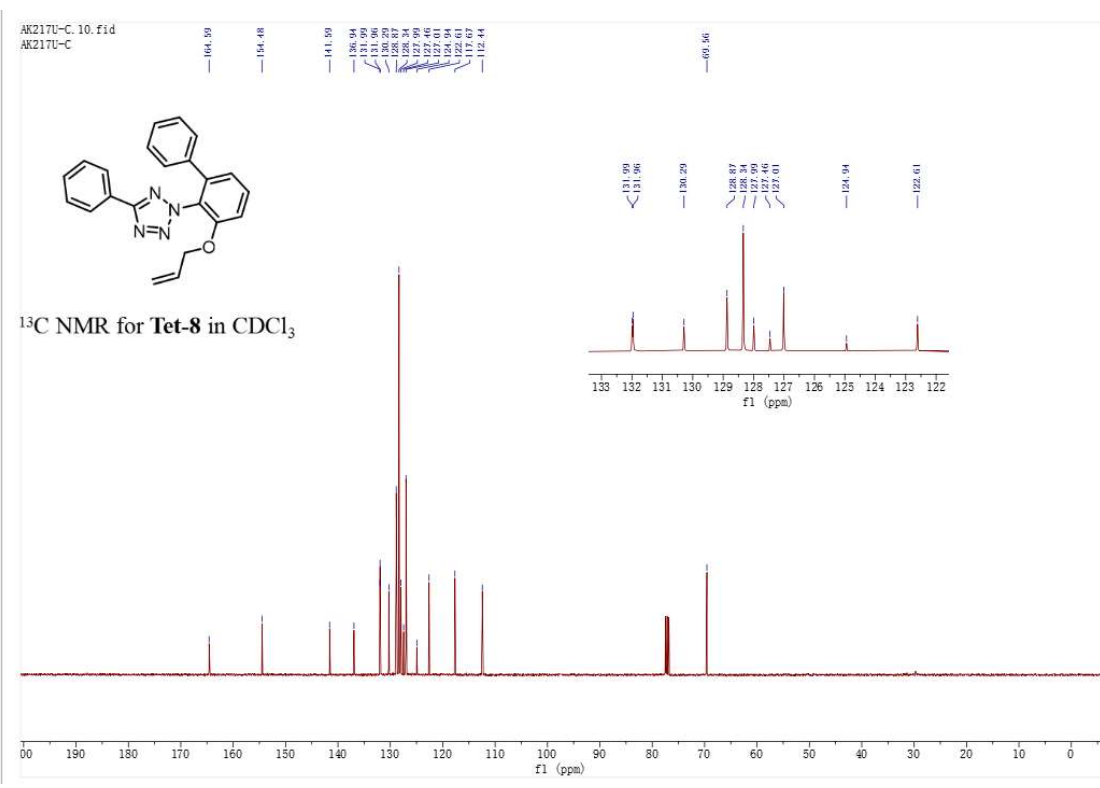

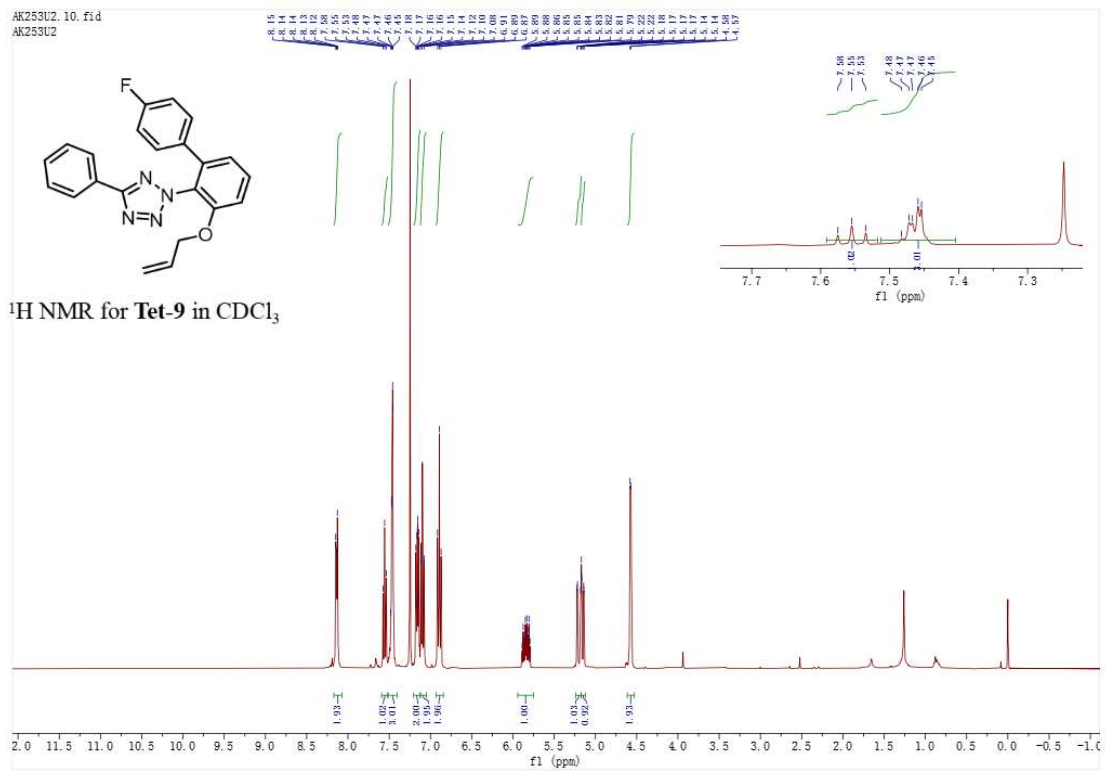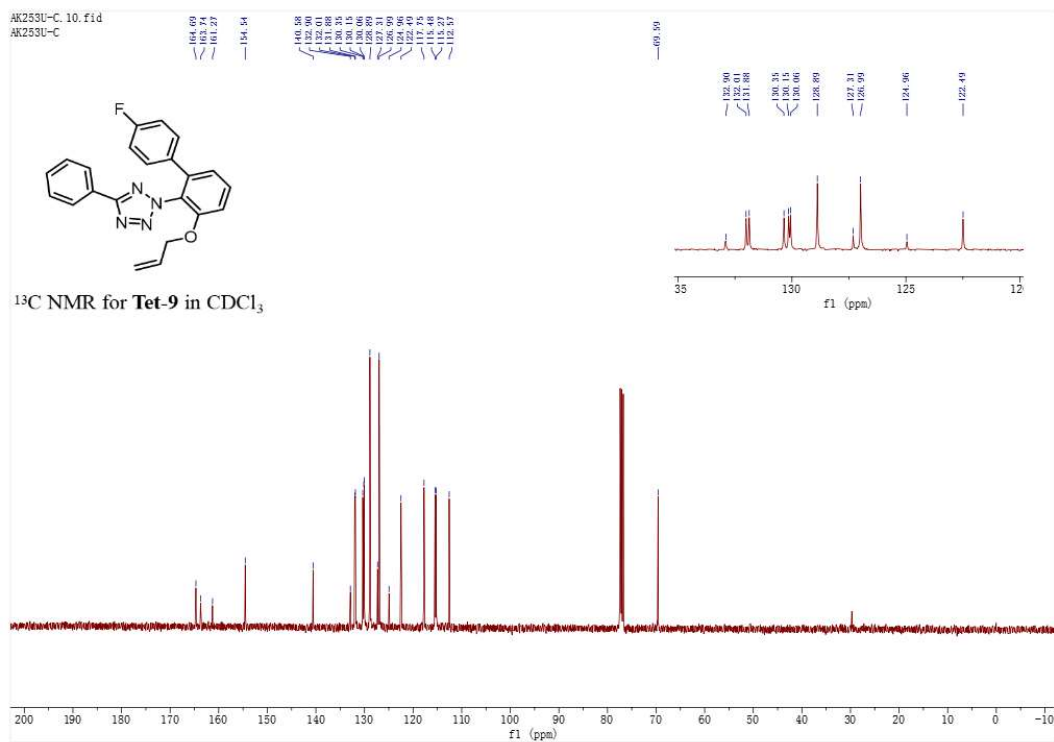

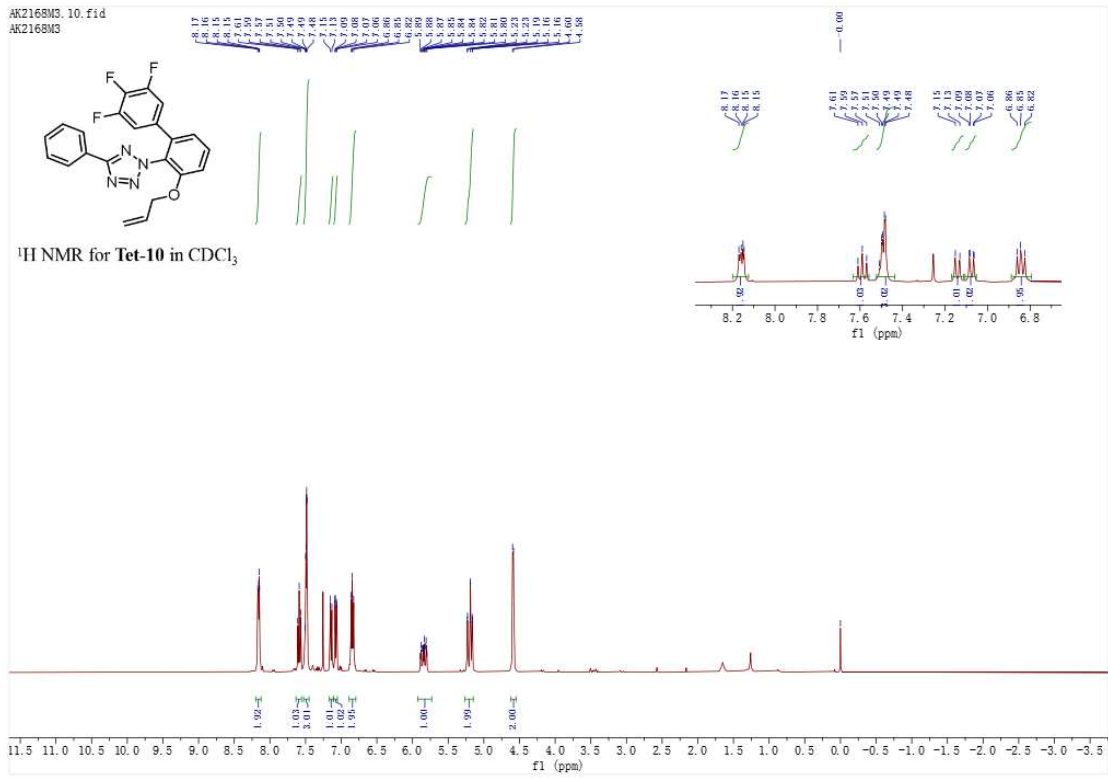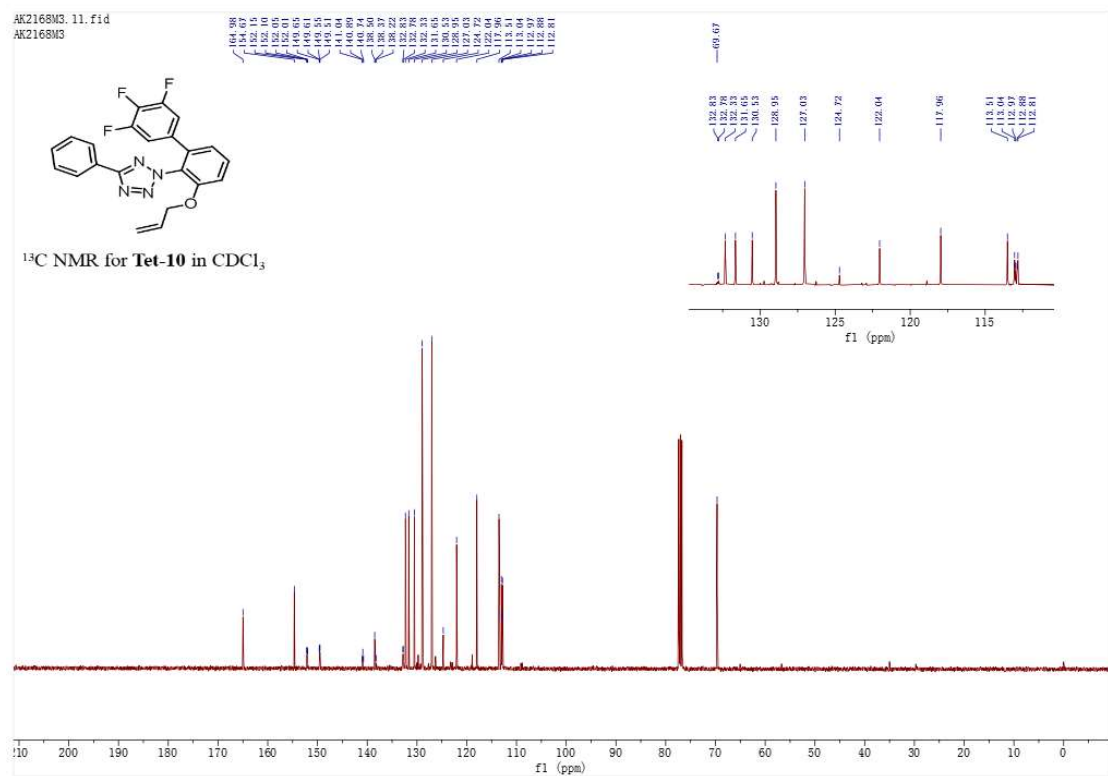

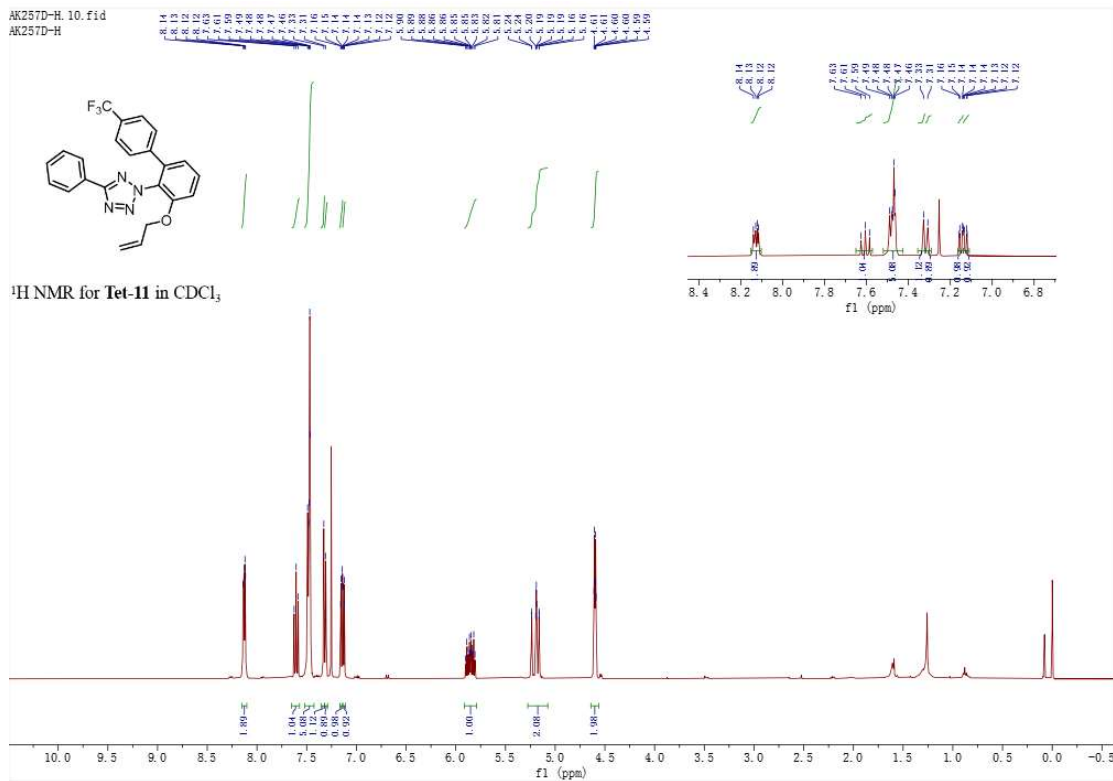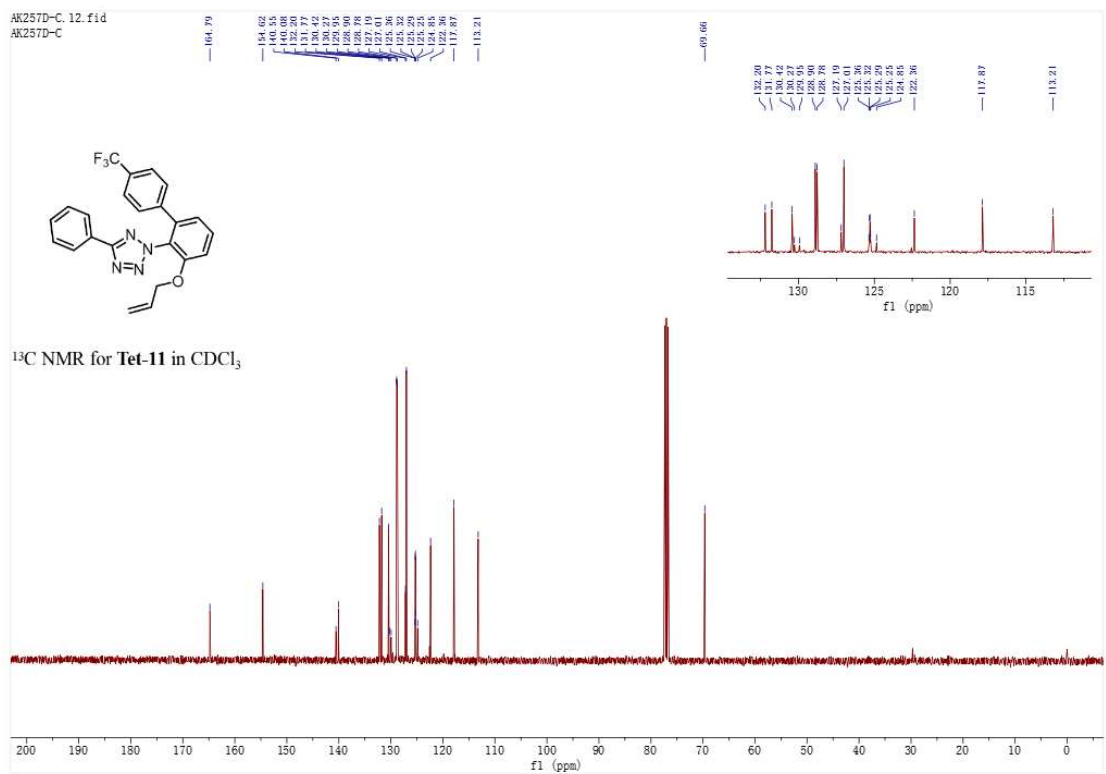

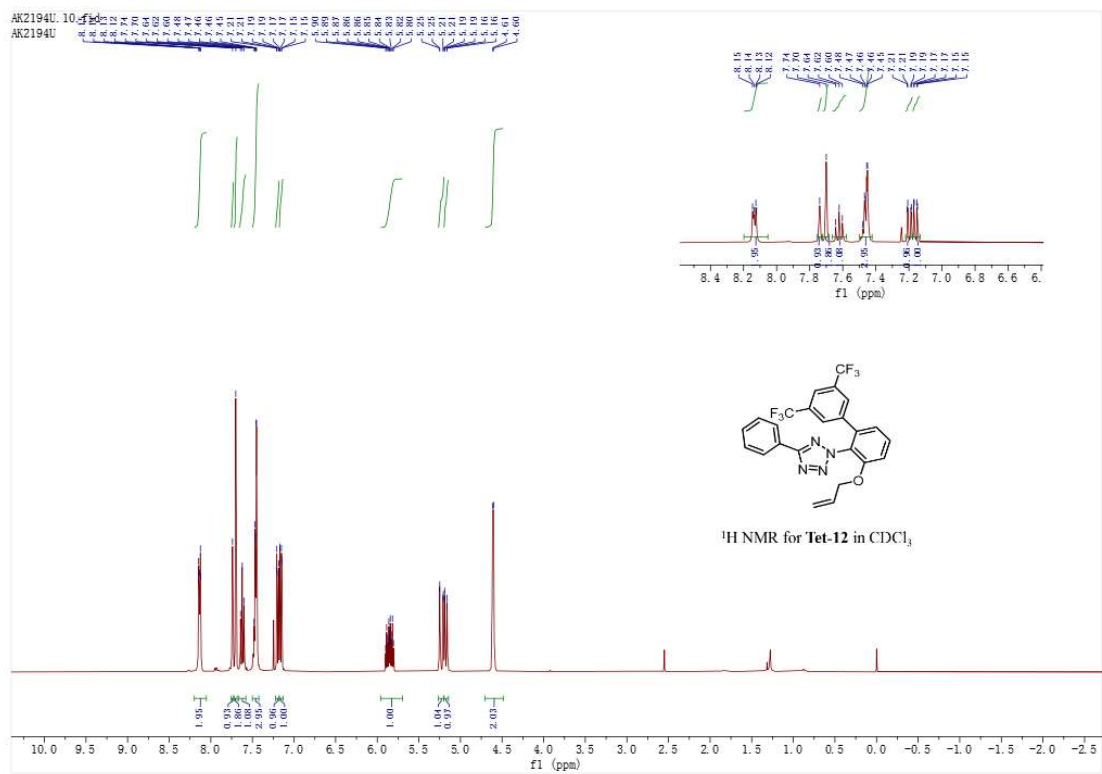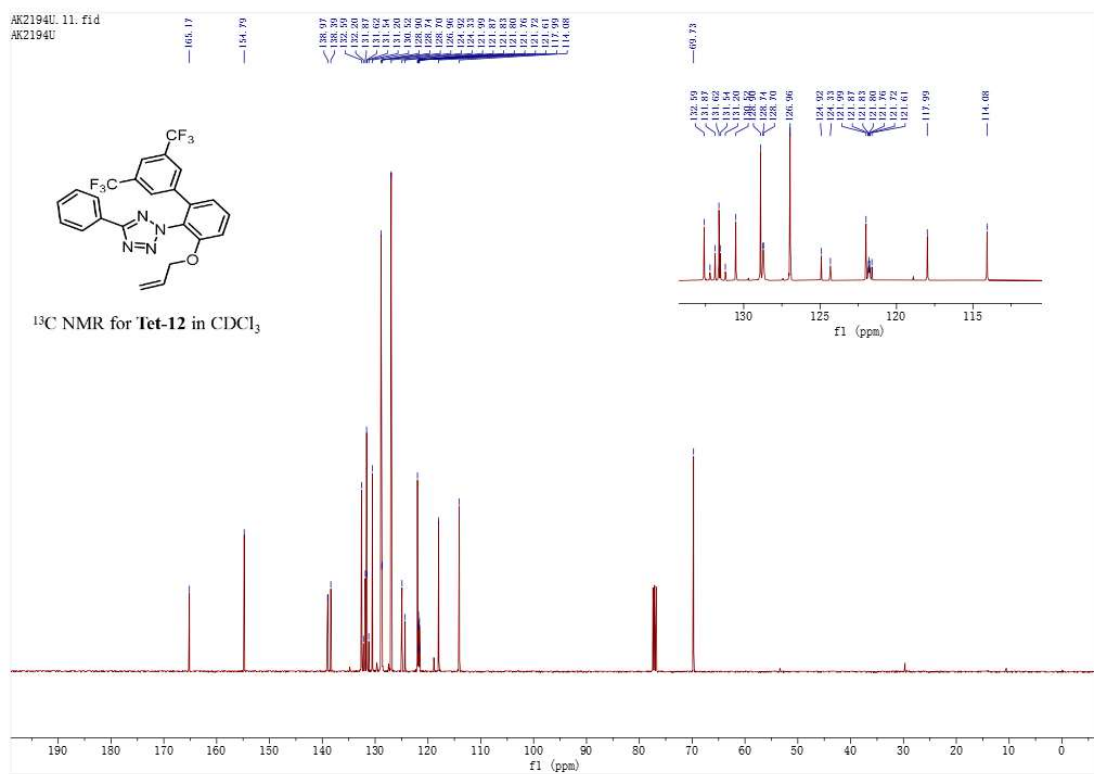

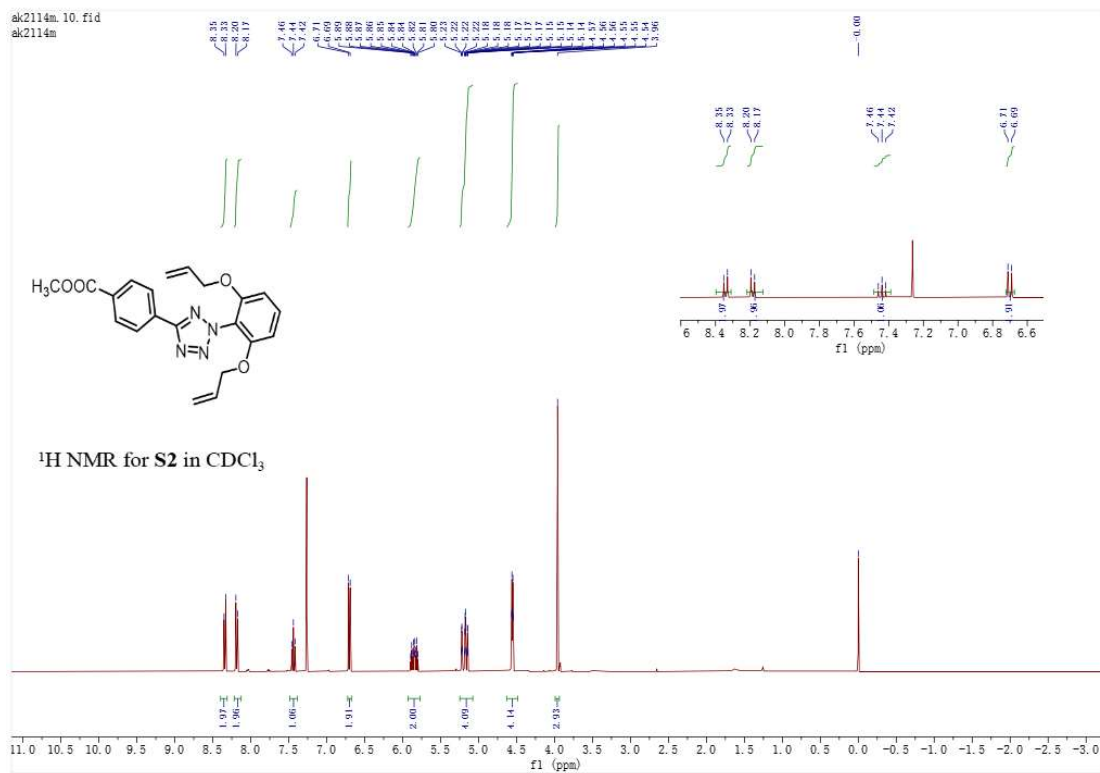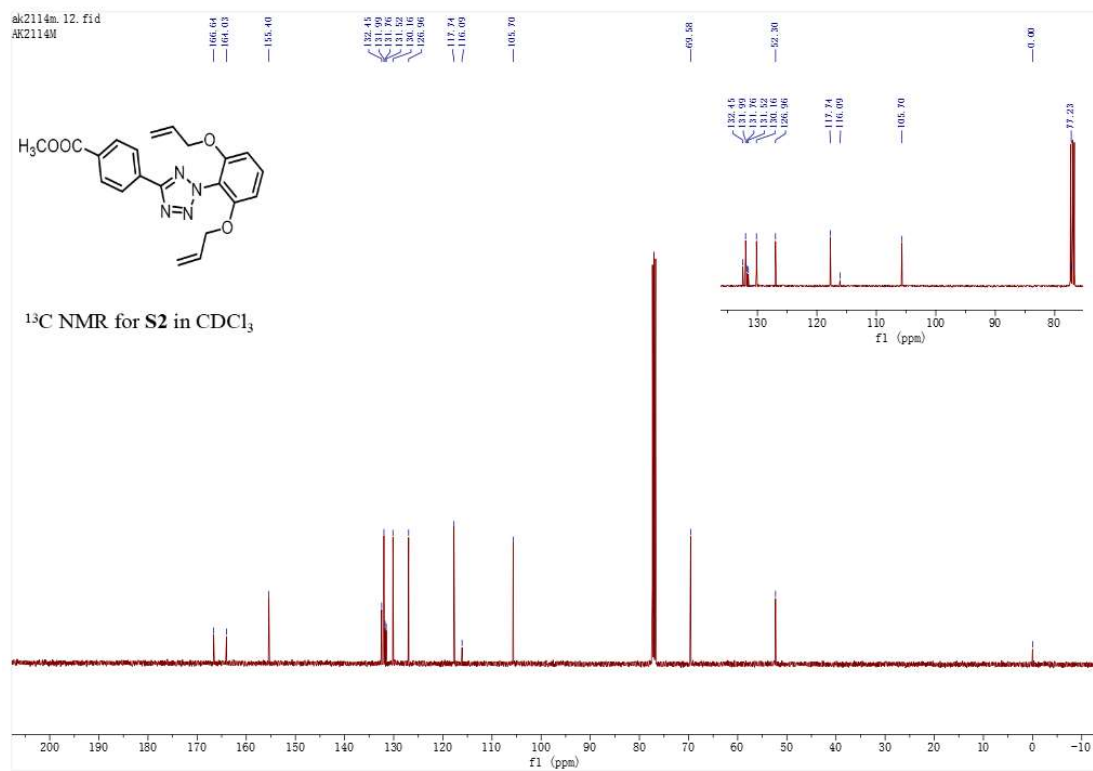



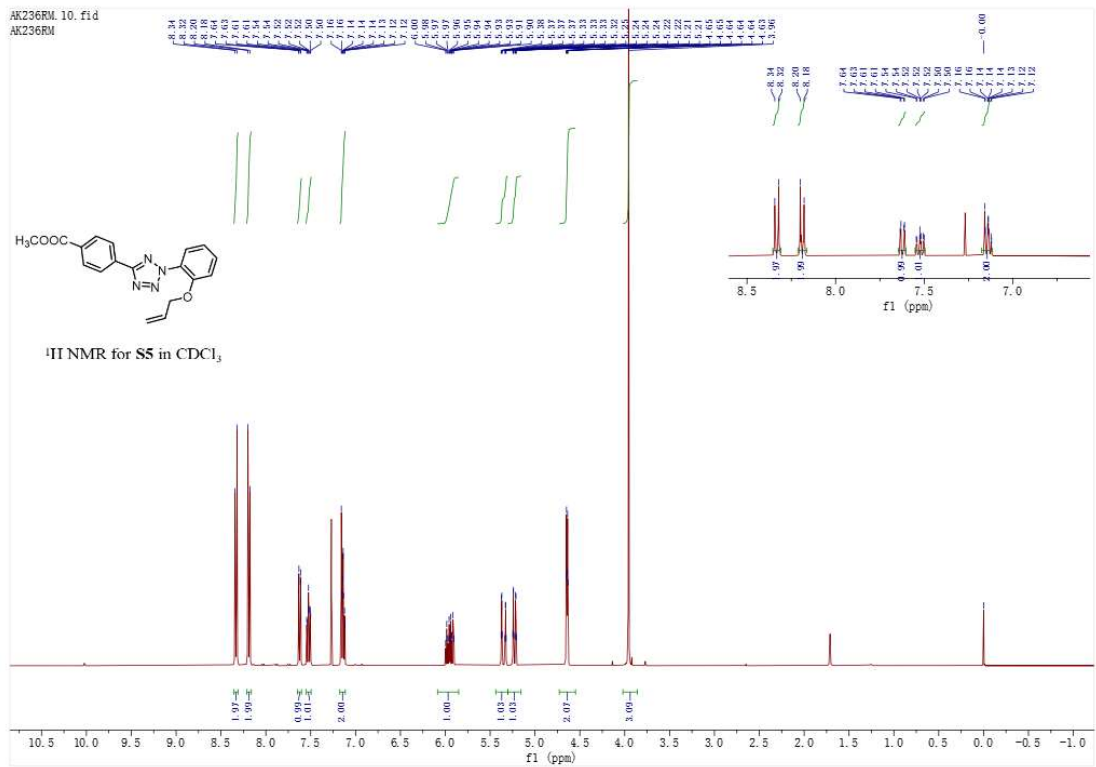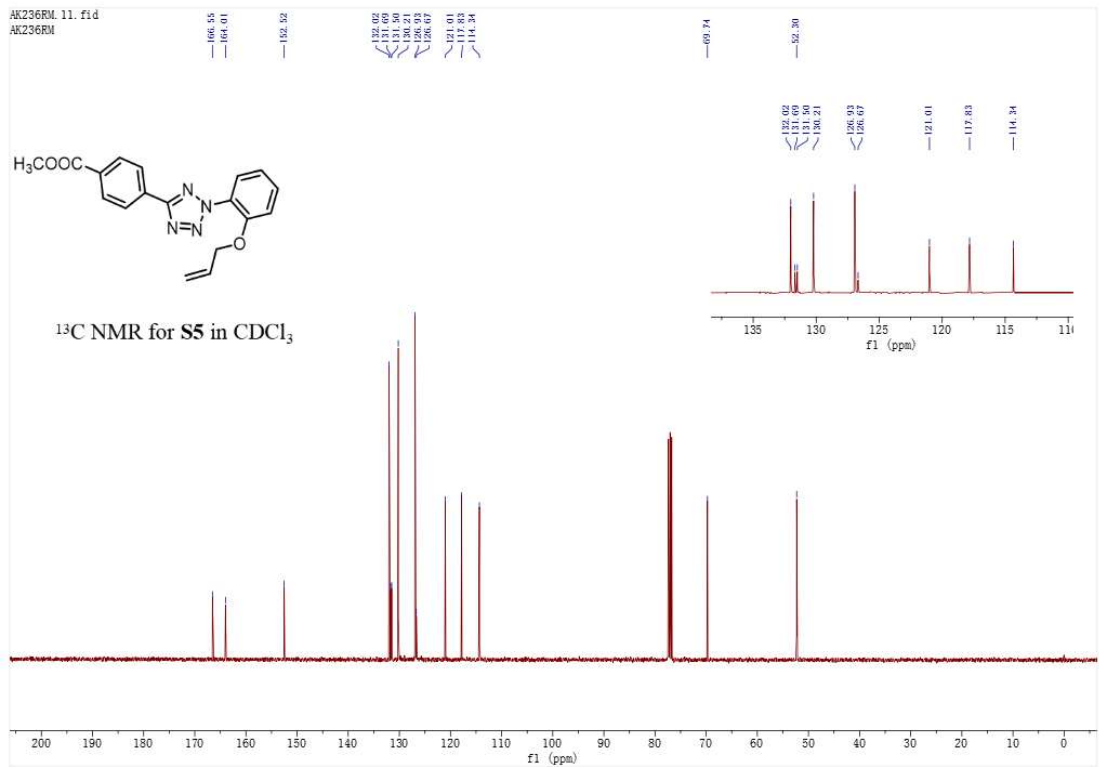

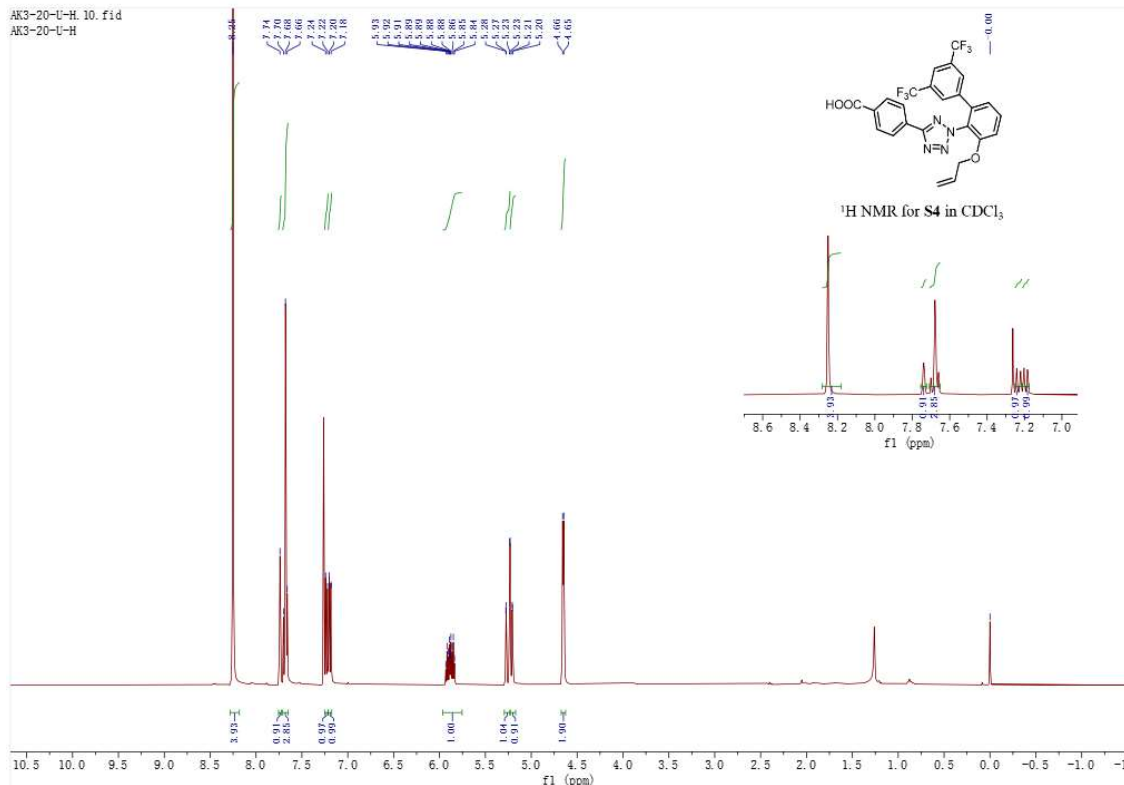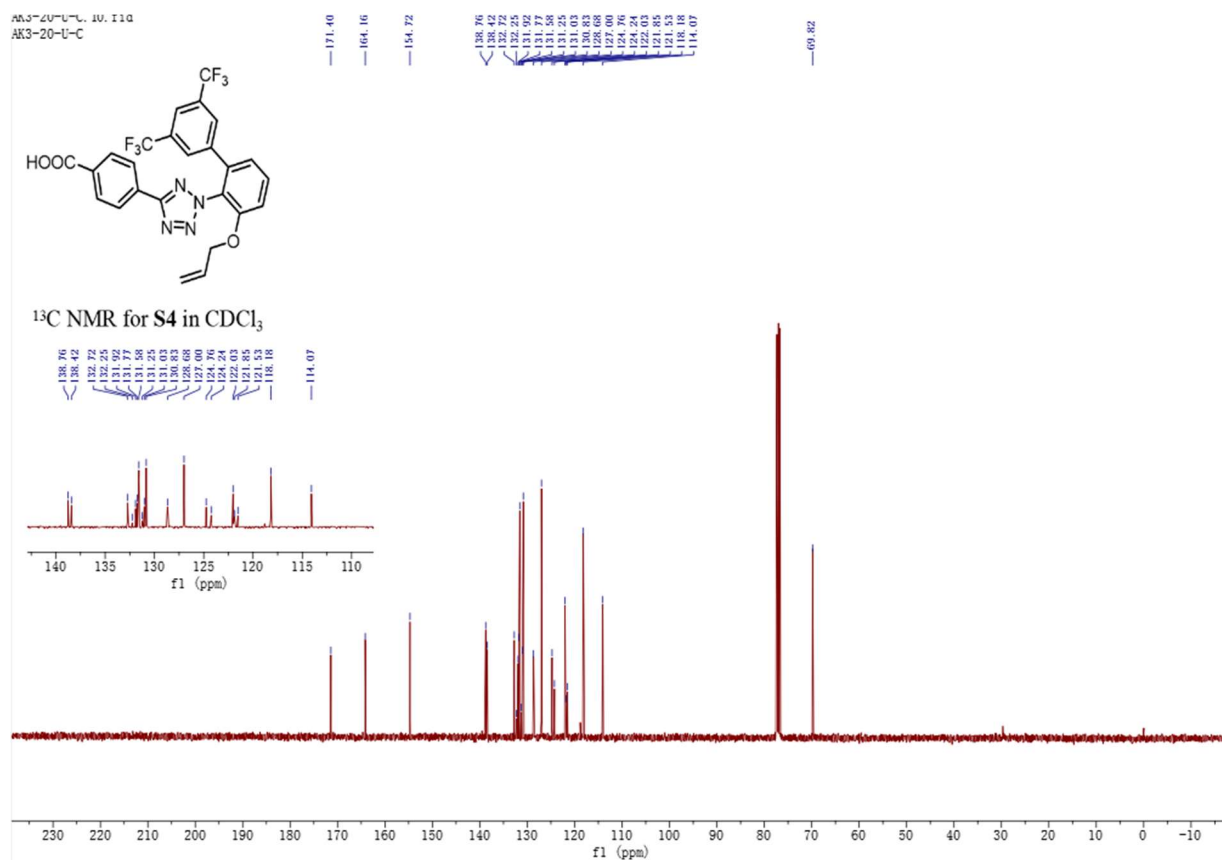

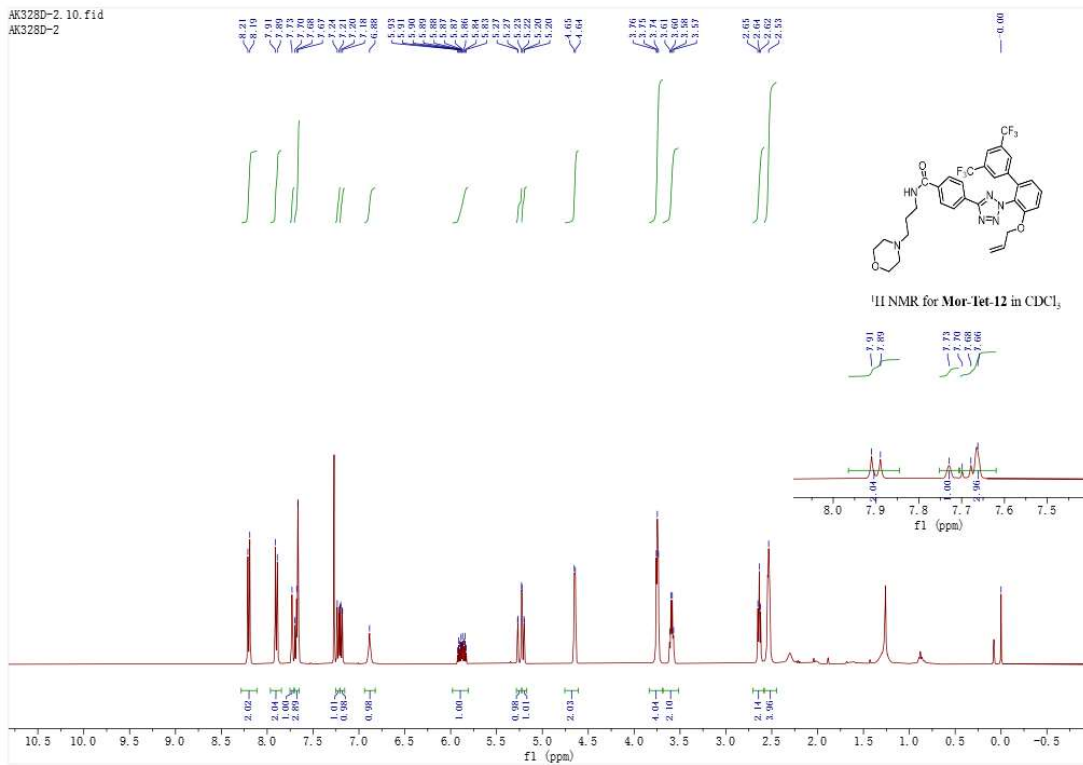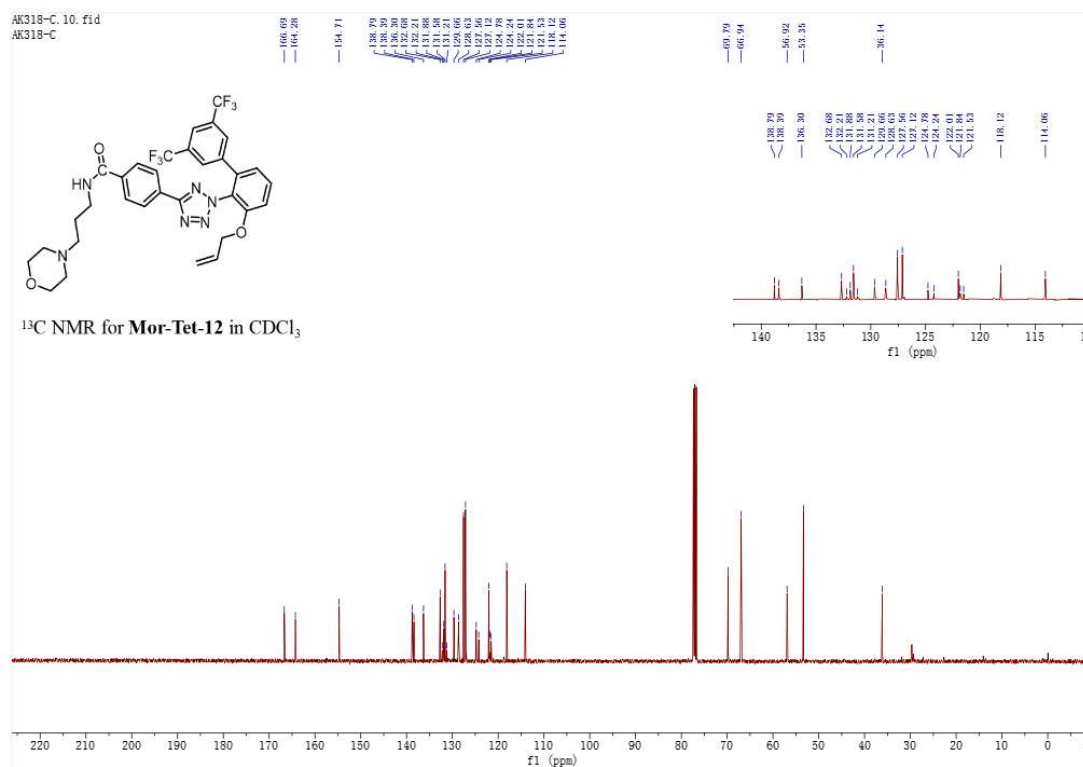

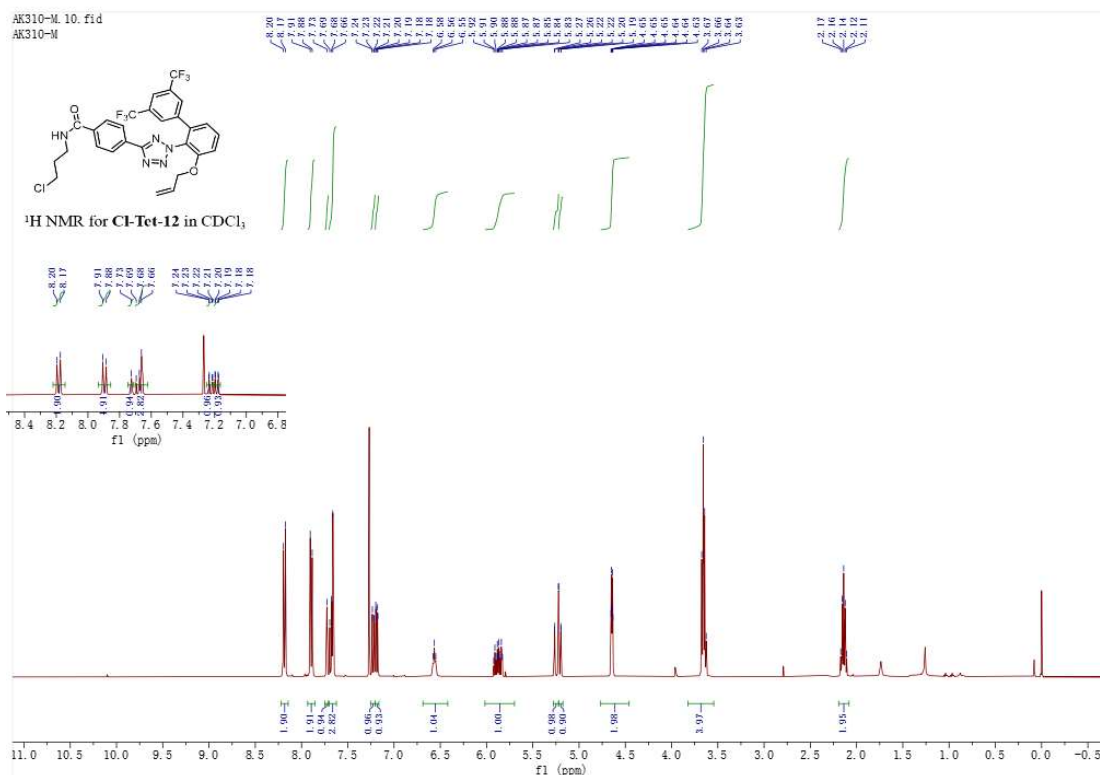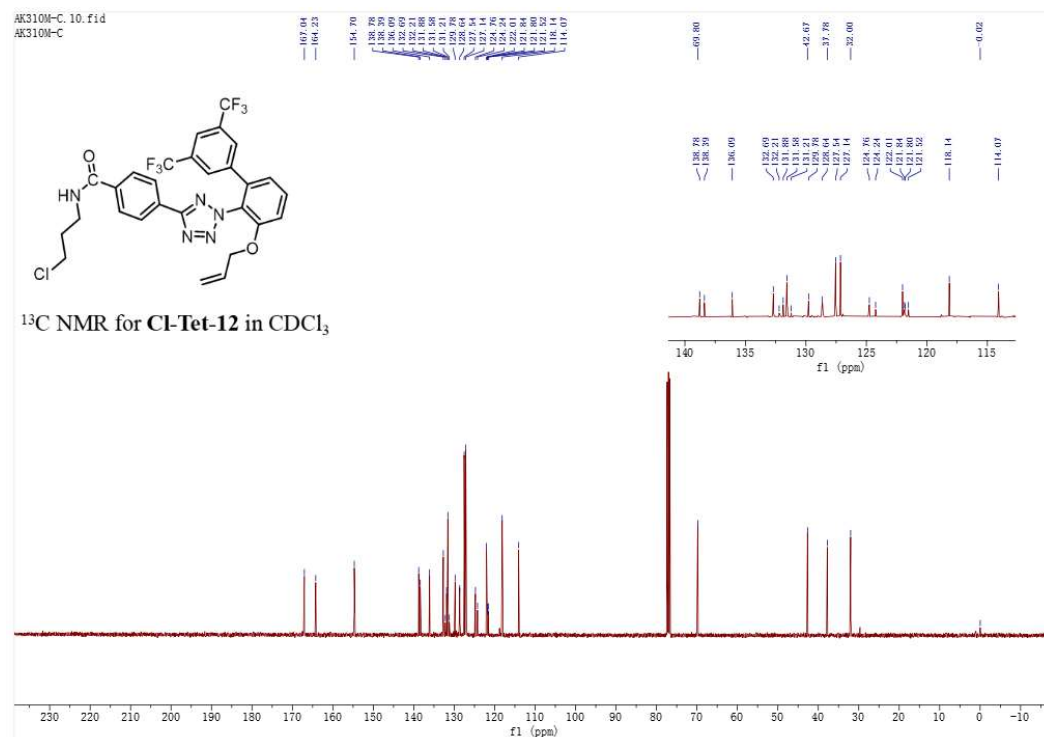

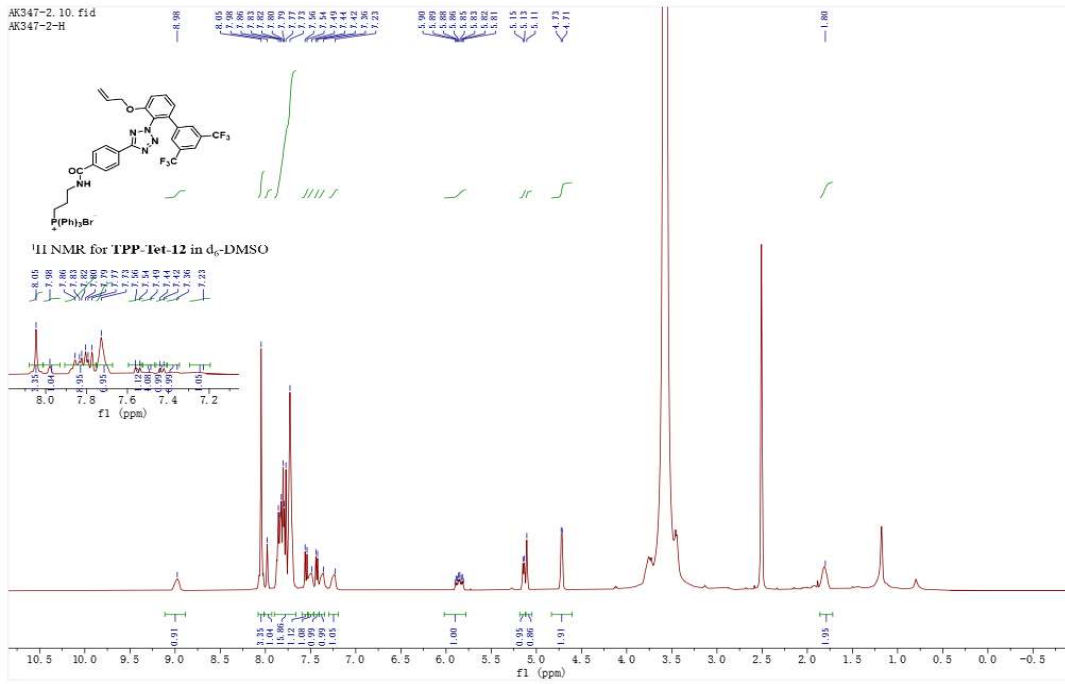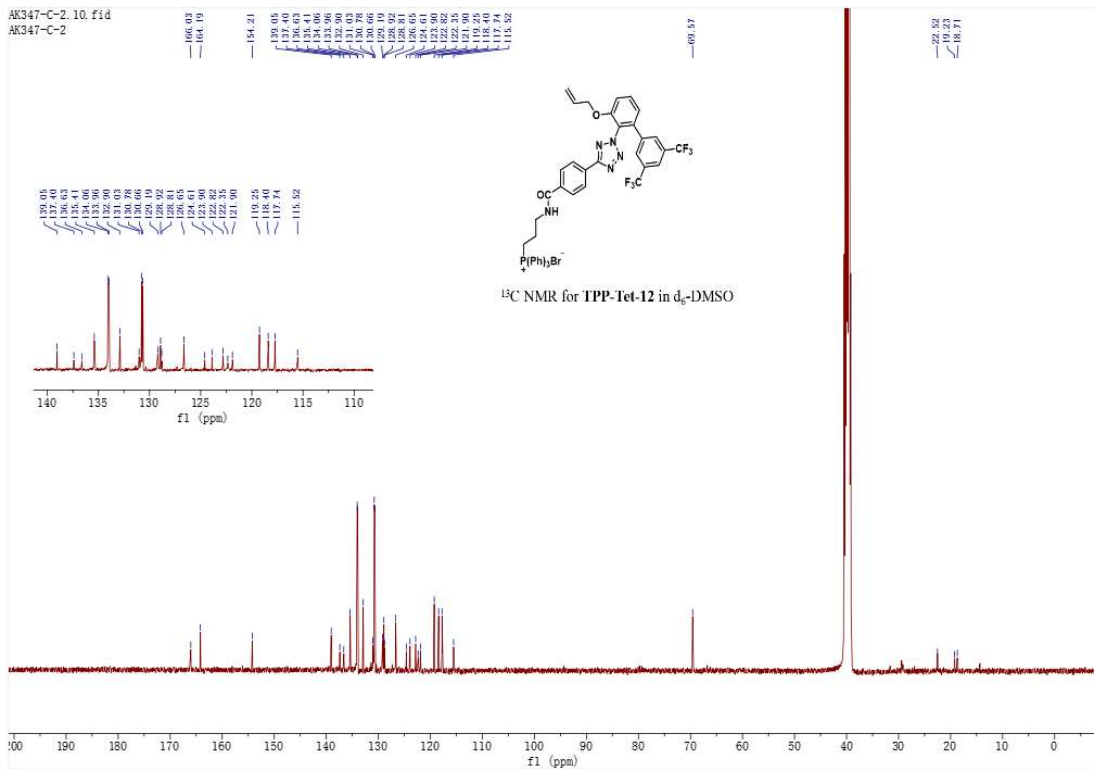

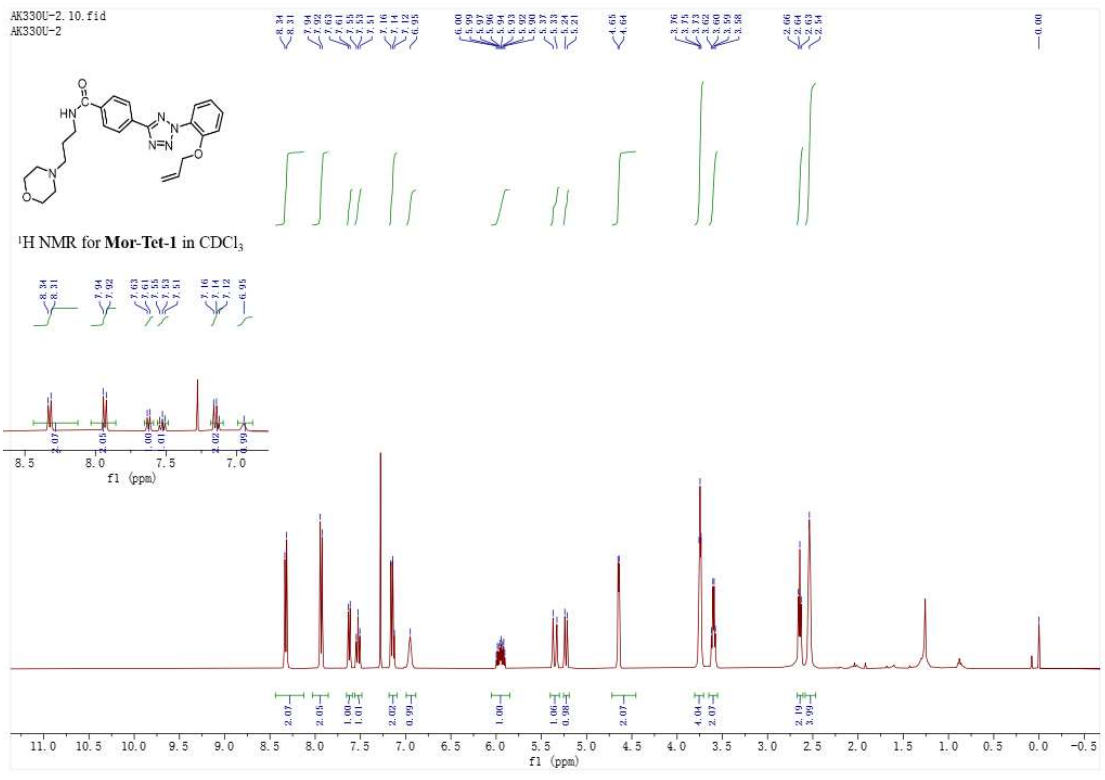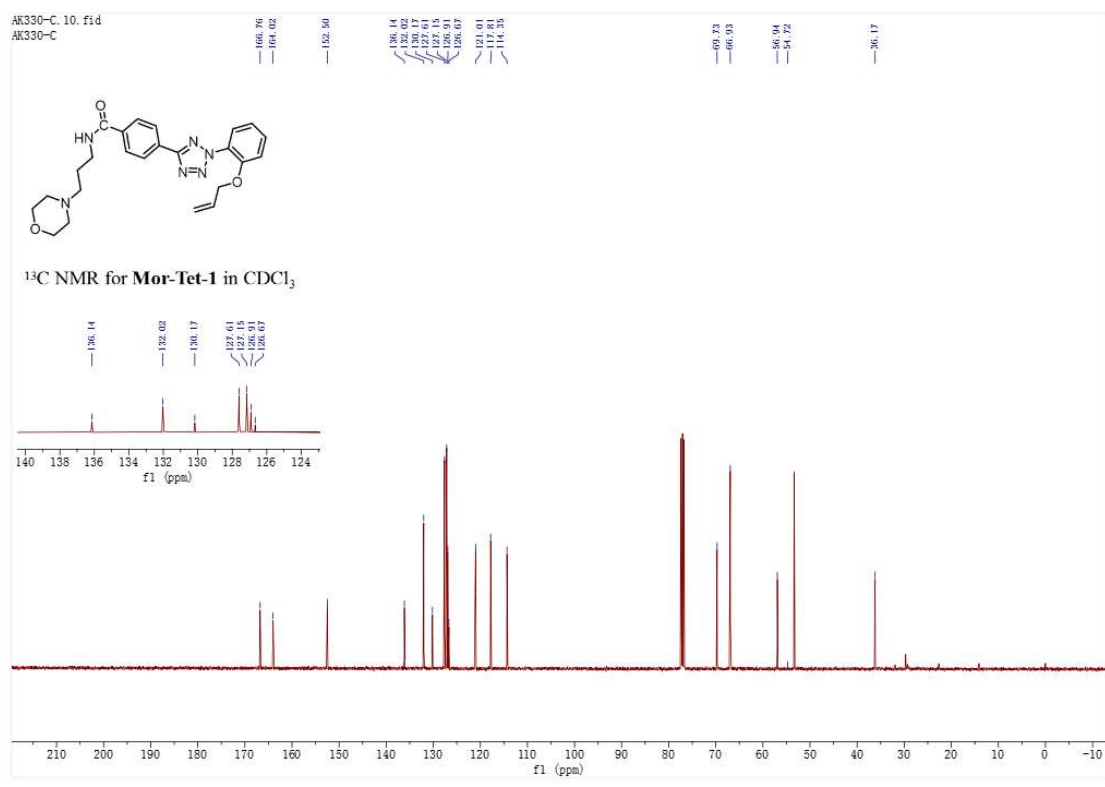

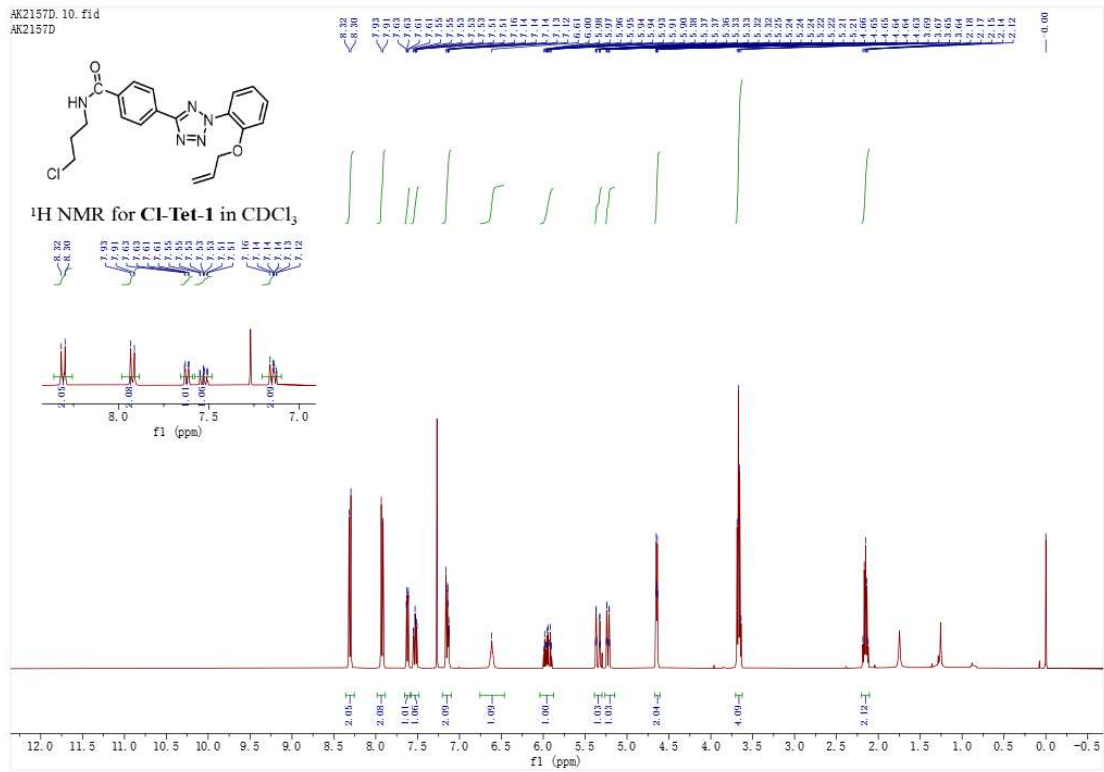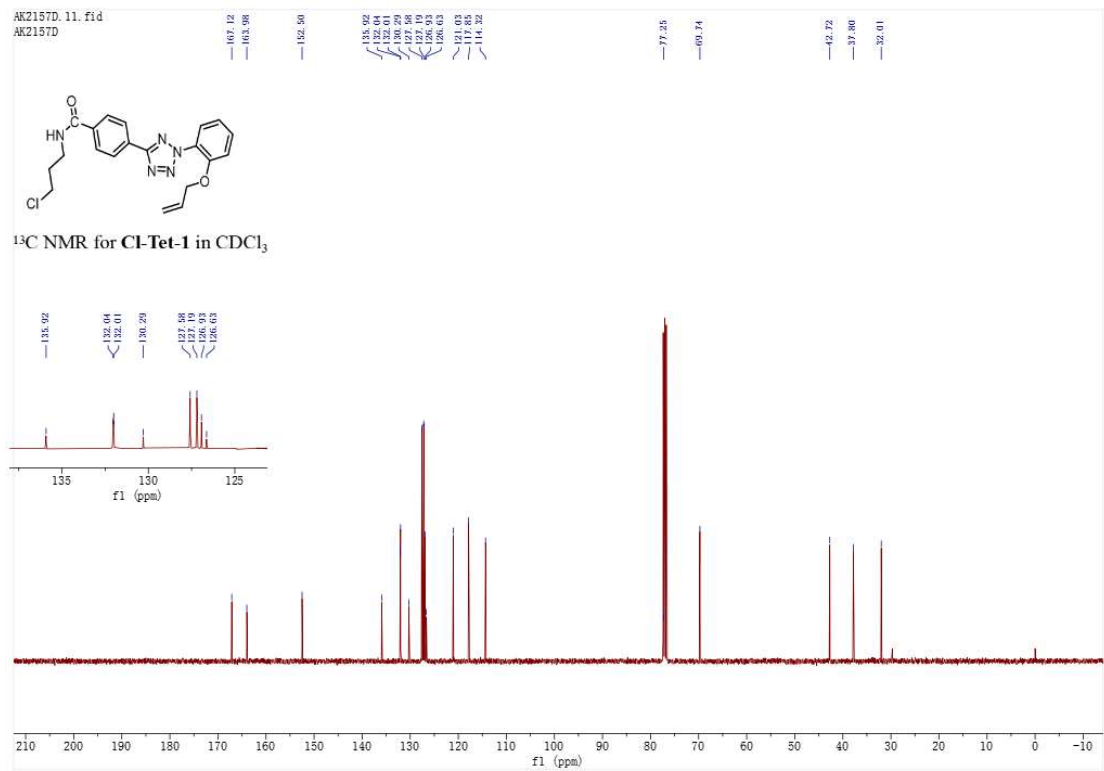

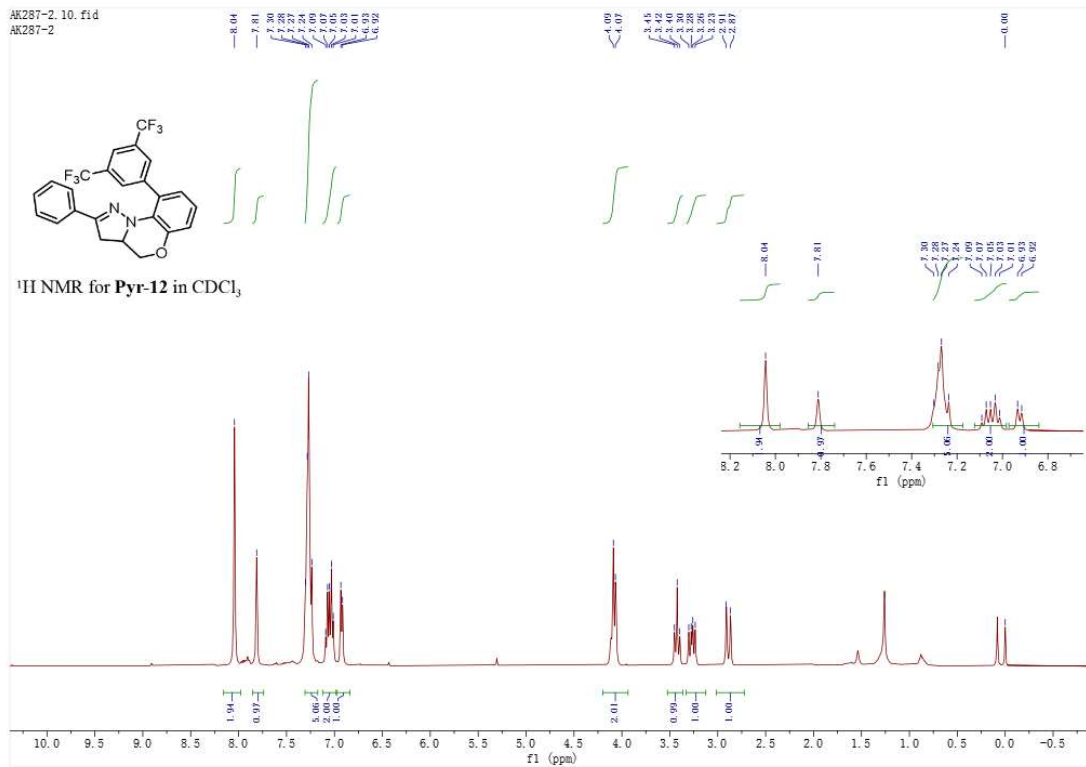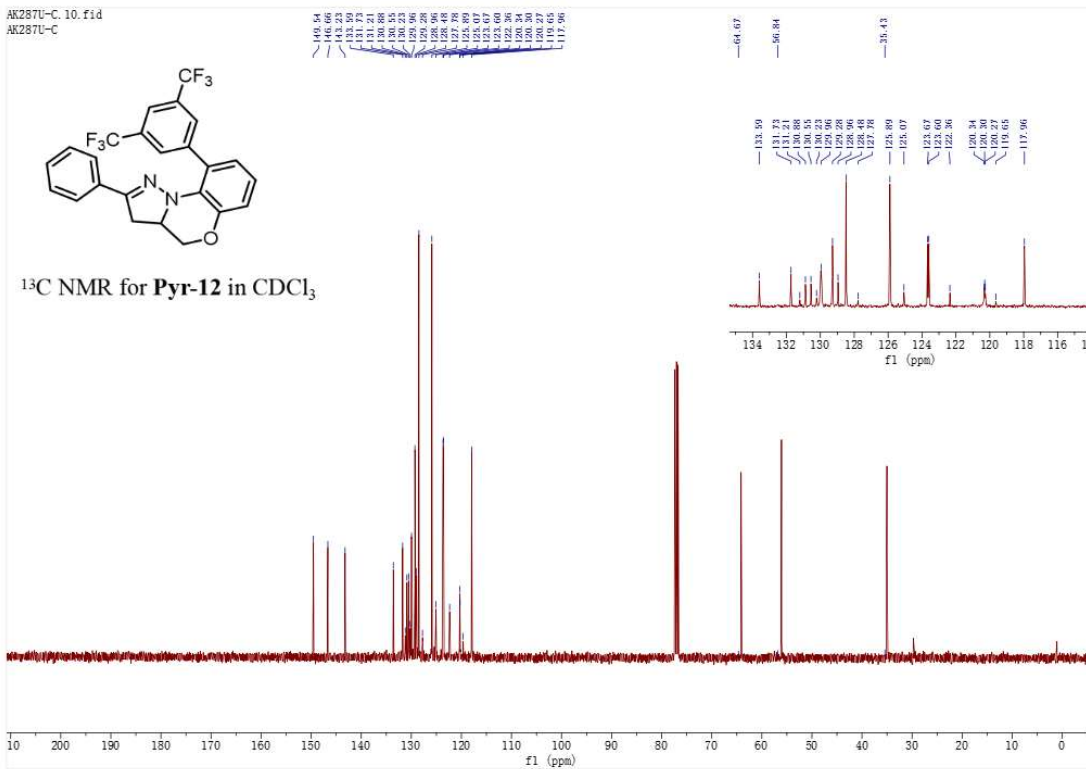

Supplement: d2cc03482d1.pdf [file d2cc03482d1.pdf]
